# Supplementary material
Source: PubMed Central journal article supplement (PMC5654323)

| <b>Index</b>                                                                                                                                          | <b>Page</b> |
|-------------------------------------------------------------------------------------------------------------------------------------------------------|-------------|
| General methods                                                                                                                                       | S2          |
| Synthesis of compounds <b>S1-S4</b> and experimental procedure to form BN-biarylcarboxamides <b>CC-1/BN-1</b> , <b>CC-2/BN-2</b> and <b>CC-3/BN-3</b> | S3–S10      |
| Air and water stability study of compounds <b>BN-1</b> , <b>BN-2</b> and <b>BN-3</b>                                                                  | S10         |
| Assays                                                                                                                                                | S11-S16     |
| Modeling                                                                                                                                              | S16-S17     |
| References                                                                                                                                            | S17         |
| NMR spectra of new compounds                                                                                                                          | S18– S51    |

## ***General Methods***

Unless specifically stated otherwise, all the manipulations were carried in air in the fume hood in ambient environment. Oxygen- and moisture-sensitive manipulations were carried out under an inert atmosphere using either standard Schlenk techniques or a glove box. Chromatography for air-sensitive compounds was performed under an inert atmosphere using dry, degassed solvents and silica gel (240-300 mesh) which had been heated under vacuum in a 180 °C oil bath for 12 hours. Compound Febinac (4-biphenylacetic acid, CAS [5728-52-9]), **S6** (biphenyl-4-carboxylic acid, CAS [92-92-2]) and amine **S5** were purchased from Sigma-Aldrich. Reagents and catalyst were purchased from Sigma-Aldrich, TCI America, and Strem Chemicals and used without further purification. Anhydrous toluene, methylene chloride, pentane, THF, and ethyl ether were taken from a solvent purification system and used without further purification; the remaining solvents were dried over calcium hydride, distilled, and freeze-pump-thaw degassed before use. Additionally, all materials used under argon were either purged with argon (in the case of solids) or stirred over calcium hydride, distilled, then freeze-pump-thaw degassed (in the case of liquids). DMA solution for silica gel chromatography is a mixture of 80% CH<sub>2</sub>Cl<sub>2</sub>, 18% MeOH and 2% concentrated ammonium hydroxide.

<sup>1</sup>H NMR, <sup>13</sup>C NMR and <sup>11</sup>B NMR spectra were recorded on a Varian Unity/Inova 300, Varian Unity/Inova 400, Varian Unity/Inova 500 or Varian Unity/Inova 600 spectrometer at ambient temperature. <sup>11</sup>B NMR were externally referenced to BF<sub>3</sub>•Et<sub>2</sub>O (δ= 0). IR spectra were recorded on a Nicolet Magna 550 FT-IR.

High-resolution mass spectrometry data were obtained at the following facilities: 1) Boston College mass spectrometry center on a JEOL AccuTOF instrument (JEOL USA, Peabody, MA), equipped with a Direct Analysis in Real Time (DART) ion source (IonSense, Inc., Danvers, MA) in positive ion mode. 2) Small Molecule Mass Spectrometry, FAS-Center for Systems Biology at Harvard University.

**Scheme S1. Synthesis of BN-biphenyl carboxylic acid S4**

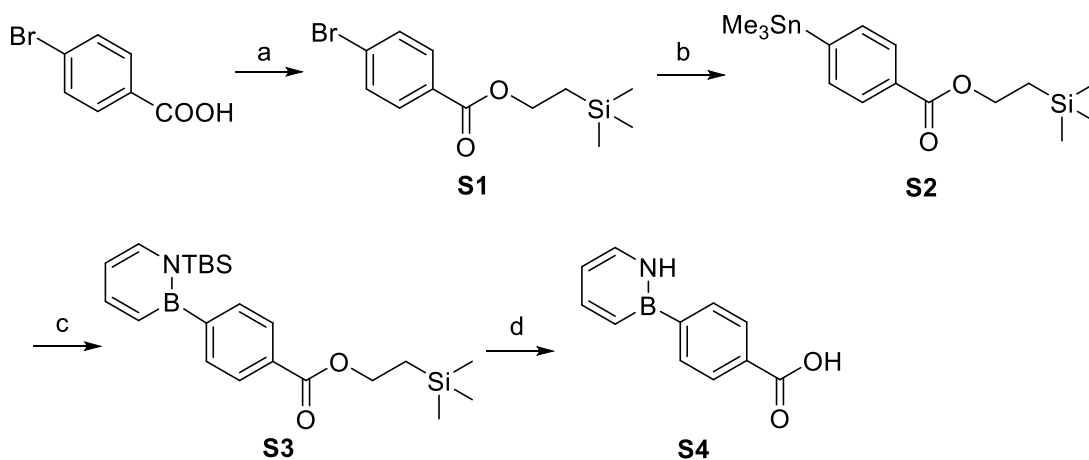

Reagents and conditions: (a) 2-(trimethylsilyl)ethanol, DMAP, DCC, CH<sub>2</sub>Cl<sub>2</sub>, 98%; (b) Pd(PPh<sub>3</sub>)<sub>4</sub>, (Me<sub>3</sub>Sn)<sub>2</sub>, toluene, 100 °C, N<sub>2</sub>, 82%; (c) 1-(tert-butyl-dimethylsilyl)-2-chloro-1,2-dihydro-1,2-azaborinine, [Rh(C<sub>2</sub>H<sub>4</sub>)<sub>2</sub>Cl]<sub>2</sub>, BIPHEP, toluene, 100 °C, N<sub>2</sub>, 89%; (d) TBAF (1.0 M in THF), THF, -25 °C to RT, N<sub>2</sub>, 84%.

**2-(Trimethylsilyl)ethyl-4-bromobenzoate S1**

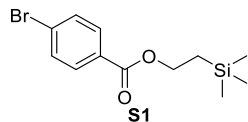

To a solution of 4-bromobenzoic acid (5.10 g, 24.9 mmol) in CH<sub>2</sub>Cl<sub>2</sub> (150 mL) was added 4-dimethylaminopyridine (180 mg, 1.47 mmol), *N,N'*-dicyclohexylcarbodiimide (5.24 g, 25.4 mmol) and 2-(trimethylsilyl)ethanol (6.20 mL, 43.3 mmol) under ice-water bath. The reaction was stirred at room temperature for 14 hours. At the conclusion of the reaction, the mixture was passed through a glass frit, and the resulting filtrate was concentrated under reduced pressure. This crude material was purified by silica gel chromatography (5% EtOAc/hexane) (v/v) to provide the desired compound as colorless oil (7.52 g, yield 98%).

<sup>1</sup>H NMR (300 MHz, CD<sub>2</sub>Cl<sub>2</sub>) δ 7.92 (d, J = 7.8 Hz, 2H), 7.62 (d, J = 7.8 Hz, 2H), 4.44 (t, J = 8.1 Hz, 2H), 1.16 (t, J = 4.8 Hz, 2H), 0.13 (s, 9H); <sup>13</sup>C NMR (126 MHz, CD<sub>2</sub>Cl<sub>2</sub>) δ 165.7, 131.6, 131.0, 129.8, 127.6, 63.4, 17.3, -1.77; FTIR (thin film):  $\tilde{\nu}$  = 2953, 1708, 1588, 1483, 1398, 1274, 1247, 1174, 1103, 1064, 1009, 935, 829, 754, 681, 607, 459; HRMS (ESI) calcd for C<sub>12</sub>H<sub>17</sub>BrO<sub>2</sub>SiNa (M+Na)<sup>+</sup> 323.0073, found 323.0075.

## 2-(Trimethylsilyl)ethyl-4-(trimethylstannyl)benzoate **S2**

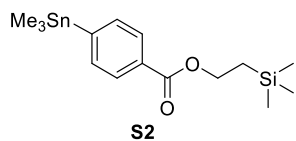

In the glovebox, to a 20 mL a pressure vessel, compound **S1** (100 mg, 0.330 mmol), tetrakis(triphenylphosphine)palladium (20 mg, 0.017 mmol), hexamethylditin (140 mg, 0.427 mmol) and toluene (4.0 mL) was added. The solution was heated to 100 °C for 15 hours, then allowed to cooled to room temperature. Volatiles were removed under reduced pressure, and the crude material was purified by silica gel chromatography (100% pentane then 10% EtOAc/hexane) (v/v) to afford the desired compound as a colorless oil (105 mg, yield 82 %).

$^1\text{H}$  NMR (300 MHz,  $\text{CD}_2\text{Cl}_2$ )  $\delta$  7.99 (d,  $J = 4.5$  Hz, 2H), 7.64 (d,  $J = 4.8$  Hz, 2H), 4.44 (t,  $J = 5.1$  Hz, 2H), 1.17 (t,  $J = 5.1$  Hz, 2H), 0.36 (s, 9H), 0.13 (s, 9H);  $^{13}\text{C}$  NMR (126 MHz,  $\text{CD}_2\text{Cl}_2$ )  $\delta$  166.8, 149.4, 135.8, 130.4, 128.2, 63.0, 17.2, -1.8, -9.9; FTIR (thin film):  $\tilde{\nu} = 1715, 1273, 1110, 1064, 858, 836, 752, 694, 528$ ; HRMS (ESI-TOF) calcd for  $\text{C}_{15}\text{H}_{26}\text{O}_2\text{SiSnNa}$  ( $\text{M}+\text{Na}$ ) $^+$  409.0618, found 409.0618.

## Compound **S3**

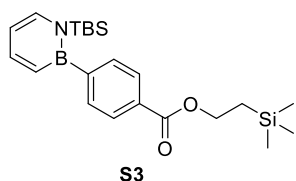

In the glovebox, chlorobis(ethylene)rhodium dimer (52 mg, 0.13 mmol, 0.05 eq.), BIPHEP (140 mg, 0.26 mmol, 0.1 eq.) and toluene (5.0 mL) were added to a 20 mL vial. The solution was stirred for 30 min, then it was transferred to a pressure vessel containing 1-(tert-butyl)dimethylsilyl)-2-chloro-1,2-dihydro-1,2-azaborinine [CAS 1138164-75-6] (650 mg, 2.86 mmol, 1.1 eq.), compound **S2** (1.00 g, 2.59 mmol, 1.0 eq) and toluene (15 mL). The pressure vessel was sealed, and the reaction mixture was heated at 100 °C for 15 hours. At the conclusion of the reaction, the reaction mixture was allowed to cool to room temperature. Volatiles were removed under reduced pressure, and the resulting crude material was purified in the glovebox

by silica gel chromatography (10% diethyl ether/pentane) to provide the desired product as white solid (951mg, yield 89%).

$^1\text{H}$  NMR (300 MHz,  $\text{CD}_2\text{Cl}_2$ )  $\delta$  8.00 (d,  $J = 8.1$  Hz, 2H), 7.66-7.71 (m, 1H), 7.51-7.55 (m, 3H), 6.68 (d,  $J = 10.5$  Hz, 1H), 6.54 (m, 1H), 4.49 (t,  $J = 4.2$  Hz, 2H), 1.23 (t,  $J = 4.5$  Hz, 2H), 0.99 (s, 9H), 0.18 (s, 9H), 0.11 (s, 6H);  $^{13}\text{C}$  NMR (126 MHz,  $\text{CD}_2\text{Cl}_2$ )  $\delta$  167.0, 143.2, 138.3, 132.0, 128.9, 127.5, 112.2, 62.9, 26.6, 18.8, 17.4, -1.7, -2.3 (the boron-bound carbon signals are not observed);  $^{11}\text{B}$  NMR (96 MHz)  $\delta$  41.3; FTIR (thin film):  $\tilde{\nu} = 3282, 2931, 1733, 1613, 1542, 1456, 1370, 1233, 1137, 813, 731, 676, 644, 504, 457$ ; HRMS (ESI) calcd for  $\text{C}_{22}\text{H}_{37}\text{BNO}_2 \text{Si}_2 (\text{M}+\text{H})^+$  414.2456, found 414.2468.

#### Compound S4

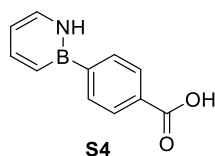

In the glovebox, compound **S3** (850 mg, 2.06 mmol) was dissolved into THF (12.0 mL) in a round-bottom flask and cooled in a  $-25$  °C freezer for 30 min. The reaction flask was then taken out of the glovebox, and TBAF (5.0 mL, 1.0 M in THF, 5.0 mmol) was added slowly. The resulting yellow solution was stirred at room temperature for 3 hr. Volatiles were removed under reduced pressure, and the crude material was purified on silica gel chromatography using  $\text{CH}_2\text{Cl}_2/\text{MeOH}/\text{AcOH}$  100:4:0.8 (v/v) as the eluent. The resulting off-white solid was recrystallized in  $\text{CH}_2\text{Cl}_2$ /hexane system to afford the desired compound (344 mg, yield 84%).

$^1\text{H}$  NMR (300 MHz, acetone- $d_6$ )  $\delta$  10.19 (br s, 1H), 7.89-8.07 (m, 4H), 7.81 (dd,  $J = 6.3, 11.1$  Hz, 1H), 7.61 (t,  $J = 6.6$  Hz, 1H), 7.22 (d,  $J = 11.1$  Hz, 1H), 6.47 (t,  $J = 6.6$  Hz, 1H) (COOH peak is not observed);  $^{13}\text{C}$  NMR (126 MHz, acetone- $d_6$ )  $\delta$  167.2, 144.8, 135.2, 132.4, 130.6, 129.0, 111.2 (the boron-bound carbon signals are not observed);  $^{11}\text{B}$  NMR (96 MHz)  $\delta$  33.6; FTIR (thin film):  $\tilde{\nu} = 1733, 1716, 1684, 1635, 1557, 1540, 1521, 1473, 1374, 724, 671, 419$ ; HRMS (DART) calcd for  $\text{C}_{11}\text{H}_{11}\text{BNO}_2 (\text{M}+\text{H})^+$  200.08828, found 200.08758.

### General experimental procedure to form BN-biarylcarboxamides

To the mixture of 2-chloro-4,6-dimethoxy-1,3,5-triazine (CDMT, 32.0 mg, 0.182 mmol) and BN Felbinac (38.0 mg, 0.176 mmol) or compound **S4** (35.0 mg, 0.176 mmol) in anhydrous CH<sub>2</sub>Cl<sub>2</sub> (3.0 mL), *N*-methylmorpholine (NMM, 20.0  $\mu$ L, 0.182 mmol) was added at 0 °C. The resulting clear solution was stirred at room temperature for 25 min. Then, the corresponding amine (1.1 equiv.) was added, and this mixture was stirred for 14 hours at room temperature (if this amine is in salt form, another 1 equiv. NMM is added). At the conclusion of the reaction, CH<sub>2</sub>Cl<sub>2</sub> (50 mL) was added to the reaction mixture, and the resulting mixture was washed with saturated NaHCO<sub>3</sub>. The organic phase was concentrated under reduced pressure. The resulting crude material was purified by silica gel chromatography to afford corresponding amide products. If necessary, recrystallization in CH<sub>2</sub>Cl<sub>2</sub>/hexane or MeOH/CH<sub>2</sub>Cl<sub>2</sub>/hexane can provide desired amide compounds as an off-white solid.

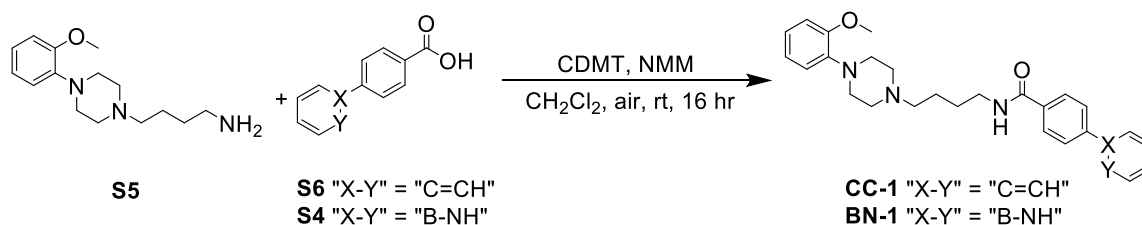

Amine **S5** [CAS 21103-33-3] was purchased from Aldrich, and the bioactive amide **CC-1** was prepared according to literature procedures.<sup>1</sup> <sup>1</sup>H NMR and mass spectra of **CC-1** match with those reported in the literature.

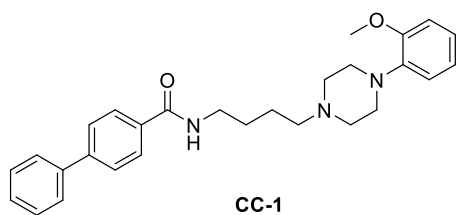

<sup>1</sup>H NMR (600 MHz, CDCl<sub>3</sub>)  $\delta$  7.84-7.86 (m, 2H), 7.56-7.63 (m, 4H), 7.34-7.45 (m, 3H), 6.93-7.00 (m, 2H), 6.83-6.87 (m, 3H), 3.83 (s, 3H), 3.49-3.51 (m, 2H), 3.08-3.11 (m, 4H), 2.69-2.75 (m, 3H), 2.54-2.58 (m, 3H), 1.67-1.73 (m, 4H); HRMS (DART) calcd for C<sub>28</sub>H<sub>34</sub>N<sub>3</sub>O<sub>2</sub> (M+H)<sup>+</sup> 444.26510, found 444.26631.

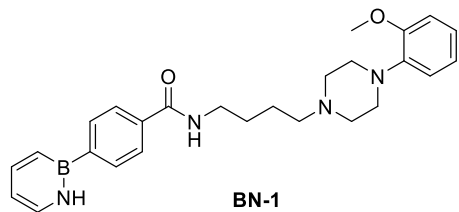

Silica gel chromatography condition (CH<sub>2</sub>Cl<sub>2</sub>/MeOH), off-white solid (110 mg, yield 82%).

<sup>1</sup>H NMR (500 MHz, CD<sub>2</sub>Cl<sub>2</sub>) δ 8.48 (br s, 1H), 7.79-7.86 (m, 5H), 7.47 (d, J = 6.5 Hz, 1H), 7.20 (d, J = 6.0 Hz, 1H), 6.86-6.97 (m, 5H), 6.46 (d, J = 6.0 Hz, 1H), 3.82 (s, 3H), 3.43-3.48 (m, 2H), 2.96-3.20 (m, 4H), 2.44-2.78 (m, 6H), 1.67-1.80 (m, br, 4H); <sup>13</sup>C NMR (126 MHz, CD<sub>2</sub>Cl<sub>2</sub>) δ 167.5, 152.4, 144.8, 141.5, 135.4, 128.4 (br), 126.5, 122.6, 120.9, 118.1, 111.4, 111.2, 57.9, 55.2, 50.2, 39.8, 31.6, 27.4, 24.2, 22.6, 13.9; <sup>11</sup>B NMR (160 MHz) δ 36.7; FTIR (thin film):  $\tilde{\nu}$  = 3553, 1699, 1612, 1541, 1499, 1462, 1364, 1310, 1239, 1180, 1117, 1088, 1022, 979, 923, 736, 677, 534; HRMS (DART) calcd for C<sub>26</sub>H<sub>34</sub>BN<sub>4</sub>O<sub>2</sub> (M+H)<sup>+</sup> 445.27748, found 445.27853.

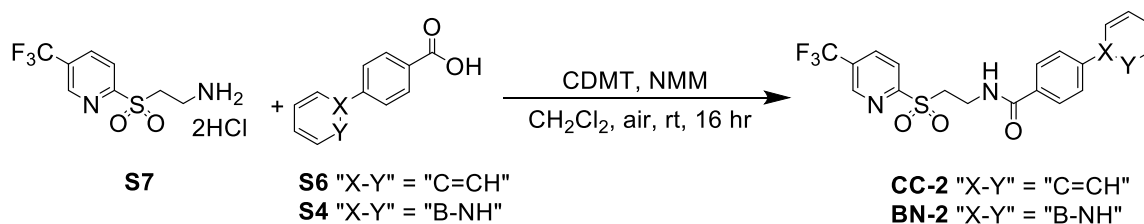

Amine **S7** [CAS 1850290-88-8] and the bioactive amide **CC-2** were prepared according to literature procedures.<sup>2</sup> <sup>1</sup>H NMR and mass spectra signals of **CC-2** match with those reported in the literature.

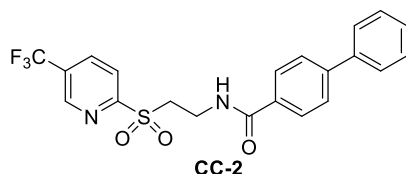

<sup>1</sup>H NMR (500 MHz, Acetone-*d*<sub>6</sub>) δ 9.07 (s, 1H), 8.51-8.53 (m, 1H), 8.34-8.36 (m, 1H), 7.84-7.91 (m, 3H), 7.72-7.74 (m, 4H), 7.44-7.54 (m, 3H), 3.89-3.97 (m, 4H); HRMS (DART) calcd for C<sub>21</sub>H<sub>18</sub>F<sub>3</sub>N<sub>2</sub>O<sub>3</sub>S (M+H)<sup>+</sup> 435.09902, found 435.09851.

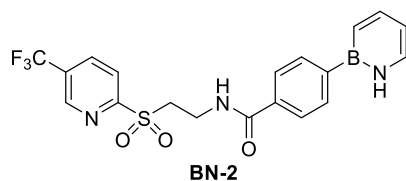

After coupling reaction, the reaction mixture was directly purified by silica gel chromatography (DMA/CH<sub>2</sub>Cl<sub>2</sub>/hexane). Off-white solid (79 mg, yield 78%).

<sup>1</sup>H NMR (500 MHz, DMSO-*d*<sub>6</sub>) δ 10.67 (br s, 1H), 9.06 (s, 1H), 8.45-8.50 (m, 2H), 8.23 (d, J = 8.5 Hz, 1H), 7.85-7.90 (m, 2H), 7.63-7.72 (m, 1H), 7.58-7.60 (m, 2H), 7.48 (t, J = 7.5 Hz, 1H), 7.07 (d, J = 11.0 Hz, 1H), 6.39 (t, J = 6.0 Hz, 1H), 3.84-3.93 (m, 2H), 3.60-3.78 (m, 2H); <sup>13</sup>C NMR (126 MHz, DMSO-*d*<sub>6</sub>) δ 166.7, 160.5, 147.7, 145.1, 137.3, 136.0, 133.7, 132.6, 127.7, 126.7, 122.7, 111.3, 50.9, 34.2 (boron-bound carbon and the CF<sub>3</sub> signals are not observed) <sup>11</sup>B NMR (160 MHz) δ 34.3; FTIR (thin film):  $\tilde{\nu}$  = 2924, 1734, 1642, 1540, 1463, 1361, 1300, 1141, 1097, 1072, 1012, 860, 814, 726, 612, 486; HRMS (DART) calcd for C<sub>19</sub>H<sub>18</sub>BF<sub>3</sub>N<sub>3</sub>O<sub>3</sub>S (M+H)<sup>+</sup> 436.11140, found 436.11278.

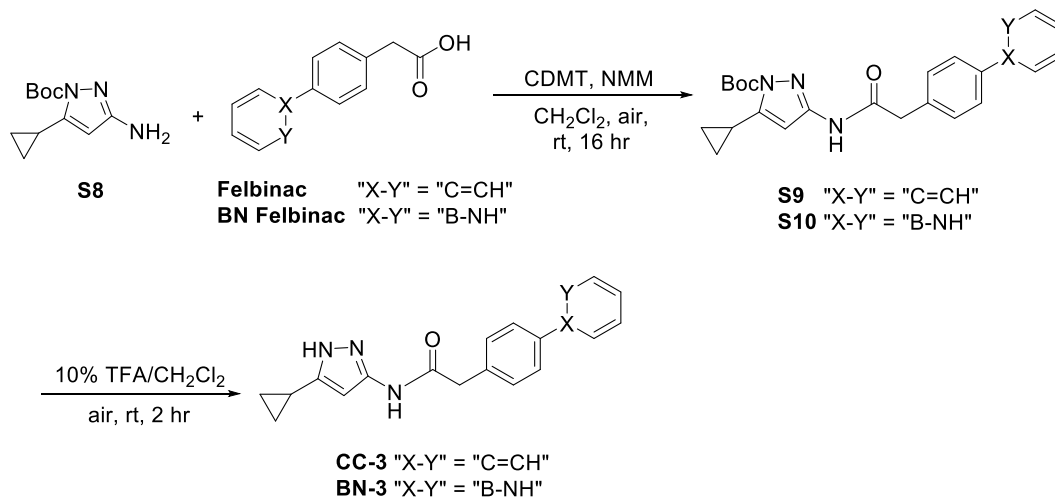

The synthesis of amine **S8** [CAS 326827-13-8]<sup>3a,3b</sup> and the bioactive amide **CC-3**<sup>3c</sup> was reported in the reference. <sup>1</sup>H NMR and mass spectra signals of **CC-3** match with those reported in the literature.



Compound **BN-3** was prepared in a two-step procedure:

Amide coupling reaction: Amine **S8** (120 mg, 0.540 mmol) was dissolved in anhydrous  $\text{CH}_2\text{Cl}_2$  (8.0 mL), then compound **BN Felbinac** (115mg, 0.54 mmol), 2-chloro-4,6-dimethoxyl-1,3,5-triazine (CDMT, 95 mg, 0.54 mmol), and N-methylmorpholine (NMM, 140  $\mu\text{L}$ , 1.08 mmol) was added at 0  $^\circ\text{C}$ . The resulting solution was stirred at room temperature for 16 hours. At the conclusion of the reaction,  $\text{CH}_2\text{Cl}_2$  (100 mL) was added to the reaction mixture, and the resulting mixture was washed with saturated  $\text{NaHCO}_3$ . The organic phase was concentrated under reduced pressure and the resulting crude material was purified by silica gel chromatography (DMA/ $\text{CH}_2\text{Cl}_2$ /hexane) to afford the desired amide **S10** as an yellow oil ( $^1\text{H}$  NMR purity >90%) which was used directly for the next step.

Boc-deprotection procedure: To the amide **S10** obtained in the previous step, 10% TFA/ $\text{CH}_2\text{Cl}_2$  (5.0 mL) was added at 0  $^\circ\text{C}$ . The mixture was then allowed to stir at room temperature for 2 hours. At the conclusion of the reaction,  $\text{CH}_2\text{Cl}_2$  (100 mL) was added to the reaction mixture, and the resulting mixture was washed with saturated  $\text{NaHCO}_3$ . The organic phase was concentrated under reduced pressure. The resulting crude material was purified by silica gel chromatography (hexane/ $\text{CH}_2\text{Cl}_2$  to DMA/ $\text{CH}_2\text{Cl}_2$ ) to afford a solid, which was further recrystallized from  $\text{CH}_2\text{Cl}_2$ /hexane to yield pure product as off-white solid (104 mg, yield 61% for two steps).

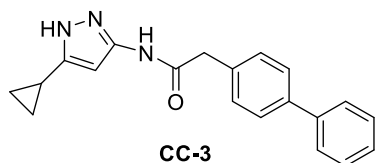

$^1\text{H}$  NMR (500 MHz,  $\text{DMSO}-d_6$ )  $\delta$  12.01 (s, 1H), 10.47 (s, 1H), 7.57-7.63 (m, 3H), 7.33-7.44 (m, 6H), 6.12 (s, 1H), 3.59 (s, 2H), 1.80-1.82 (m, 1H), 0.85-0.88 (m, 2H), 0.60-0.62 (m, 2H); HRMS (DART) calcd for  $\text{C}_{20}\text{H}_{20}\text{N}_3\text{O}$  ( $\text{M}+\text{H}$ ) $^+$  318.16604, found 318.15979.

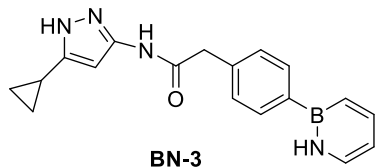

$^1\text{H}$  NMR (500 MHz,  $\text{DMSO-}d_6$ )  $\delta$  12.04 (s, 1H), 10.58 (bs, 1H), 10.47 (s, 1H), 7.82 (d,  $J = 8.0$  Hz, 2H), 7.67-7.70 (m, 1H), 7.47 (t,  $J = 7.0$  Hz, 1H), 7.34 (d,  $J = 8.0$  Hz, 2H), 7.06 (d,  $J = 11.0$  Hz, 1H), 6.36 (t,  $J = 6.5$  Hz, 1H), 6.15 (s, 1H), 3.59 (s, 2H), 1.76-1.83 (m, 1H), 0.88-0.90 (m, 2H), 0.62-0.65 (m, 2H);  $^{13}\text{C}$  NMR (150 MHz,  $\text{DMSO-}d_6$ )  $\delta$  168.5, 144.7, 137.1, 135.8, 132.9, 129.5, 129.1, 128.7, 127.7 (br), 126.9, 110.7, 43.0, 8.2, 7.3 (the exocyclic boron-bound carbon signal was not observed);  $^{11}\text{B}$  NMR (160 MHz)  $\delta$  33.4; FTIR (thin film):  $\tilde{\nu} = 3373, 1655, 1590, 1539, 1484, 994, 802, 731, 676, 597, 459$ ; HRMS (DART)  $\text{C}_{18}\text{H}_{20}\text{BN}_4\text{O}$  ( $\text{M}+\text{H}$ ) $^+$  319.17379, found 319.17413.

#### *Air and water stability study of compound BN-1, BN-2 and BN-3*

Air and water stability study procedures were adapted from a previously reported study with minor modifications.<sup>4</sup>

In the fume hood, a J-Young NMR tube was charged with compound **BN-1** (5.0 mg),  $\text{CDCl}_3$  (0.5 mL), internal standard toluene (2  $\mu\text{L}$ ), and  $\text{H}_2\text{O}$  (2  $\mu\text{L}$ ).  $^1\text{H}$  and  $^{11}\text{B}$  NMR were taken at time 0 hr. Then the sample was vigorously shaken and immersed into a pre-heated 50  $^\circ\text{C}$  oil bath.  $^1\text{H}$  and  $^{11}\text{B}$  NMR were taken at indicated time points.  $^1\text{H}$  and  $^{11}\text{B}$  NMR analysis indicated no decomposition of **BN-1** after 24 hours.

In the fume hood, a J-Young NMR tube was charged with the individual compound **BN-2** or **BN-3** (5.0 mg),  $\text{DMSO-}d_6$  (0.5 mL), internal standard toluene (2  $\mu\text{L}$ ), and  $\text{H}_2\text{O}$  (2  $\mu\text{L}$ ).  $^1\text{H}$  and  $^{11}\text{B}$  NMR were taken at time 0 hr. Then the sample was vigorously shaken and immersed into a pre-heated 50  $^\circ\text{C}$  oil bath.  $^1\text{H}$  and  $^{11}\text{B}$  NMR were taken at indicated time points.  $^1\text{H}$  and  $^{11}\text{B}$  NMR analysis indicated no decomposition of **BN-2** and **BN-3** after 24 hours.

## *Assays*

### **Rat Liver Microsome assay**

Performed according to standard literature methods (Obach, RS (1999) Drug Metab Dispos; 27:1350-1359). Liver microsomes from male Sprague-Dawley rats were obtained from BDGentest (catalog #452501), Briefly, test compound was dissolved in DMSO at 10 mM and diluted to 10 uM in 50 mM Pi, pH 7.4. 0.1 volume of this was added to a 0.5 mg/ml suspension of rat liver microsomes in 50 mM Pi, pH 7.4. Reaction is initiated by addition of 1 mM NADPH, 2 mM MgCl<sub>2</sub>. Samples are withdrawn after 0, 5, 15, and 30 minutes incubation at 37 °C and mixed with 1 vol acetonitrile. Test compound remaining is determined by peak area in LC/MS chromatogram relative to t = 0 peak area. Clearance is calculated applying literature scaling factors to test compound elimination rate constant, which is determined by slope of ln[compound remaining] vs. time.

### **CYP3A4**

Inhibition of CYP3A4 activity was performed according to literature methods (i.e. Kim, et al, (2005) Rapid Commun Mass Spectrom; 19:2650-2658 and Obach et al (2006) J Pharmacol Exp Ther; 316:336-348). Briefly, compounds at serially diluted concentrations between 0.1 and 20 uM (final) were included in incubations with human liver microsomes (0.05 mg/ml, BDGentest) at 37 °C. Midazolam was added at 1 uM as test substrate and reaction initiated by addition of 1 mM NADPH. Reaction was terminated after 10 minutes and amount of 1'-hydroxymidazolam (product formed from midazolam by CYP3A4) determined by LC/MS methods. Inhibition of 1'-hydroxymidazolam formation relative to buffer controls and calculation of IC<sub>50</sub> was done by standard data analysis methods.

### **Rat in vivo PK**

Male Sprague-Dawley rats, 9-11 weeks old and jugular vein cannulated, were obtained from Envigo. Test compound was dissolved in a formulation consisting of 15% PEG300, 7.5% Solutol and 7.5% CremophoreEL in water. **BN-3** was dosed to SD rat at 1 mg/kg by intravenous bolus injection (IV) through the jugular cannula. **CC-3** was dosed IV at 0.5 mg/kg. Blood samples were taken at times after dosing (up to 24 h). Similarly, **BN-3** and **CC-3** were dosed orally (PO, *per os*) at 5 mg/kg. Blood samples were taken up to 7 hours after dosing. Plasma was obtained by

centrifugation of the blood samples and analyzed for concentration of **BN-3** or **CC-3** by LC/MS methods. Non-compartmental analysis was performed on the concentration data according to standard methods to obtain area under the concentration-time curve (AUC), clearance (CL), bioavailability (F) and half-life ( $t_{1/2}$ ).

Concentration-time data (average of N=2):

| Time (h) | CC-3<br>0.5 mg/kg IV<br>(nM) | BN-3<br>1.0 mg/kg IV<br>(nM) | CC-3<br>5 mg/kg PO<br>(nM) | BN-3<br>5 mg/kg PO<br>(nM) |
|----------|------------------------------|------------------------------|----------------------------|----------------------------|
| 0.083    | 1177.5                       | 2761.7                       | --                         | --                         |
| 0.25     | 552.1                        | 2007.3                       | 311.0                      | 211.1                      |
| 0.5      | 360.0                        | 1066.4                       | 691.6                      | 239.7                      |
| 1        | 90.7                         | 514.0                        | 448.6                      | 485.6                      |
| 2        | 11.1                         | 69.4                         | 341.8                      | 685.4                      |
| 4        | 9.1                          | 30.4                         | 75.8                       | 546.8                      |
| 7        | 4.2                          | 16.2                         | 31                         | 117.4                      |
| 24       | 4.8                          | 7.6                          | --                         | --                         |

### **hERG binding**

Cell membranes were prepared from HEK-293 cells recombinantly expressing the KCNH2 (hERG) gene. Membranes (about 40 µg protein) were incubated for 60 min at 22 °C with 3 nM [<sup>3</sup>H]dofetilide in the absence or presence of the test compound in a buffer containing 50 mM Tris-HCl (pH 7.4), 10 mM KCl and 1 mM MgCl<sub>2</sub>, in an assay volume of 200 µl in a 96-well plate. Non-specific binding was determined in the presence of 25 µM terfenadine. Following the incubation, the samples were filtered rapidly under vacuum through glass fiber filters (GF/B) presoaked with 0.3% polyethyleneimine (PEI) and rinsed several times with ice-cold 50 mM Tris-HCl, 10 mM KCl and 1 mM MgCl<sub>2</sub> using a 96-sample cell harvester (Unifilter, Packard). The filters were then dried and counted for radioactivity in a scintillation counter (TopCount, PerkinElmer) using a scintillation cocktail (Microscint-O, PerkinElmer). Test compounds were dissolved in DMSO. The final concentration of DMSO in the assay was 1%.

### **PPAR (γ and δ) antagonist**

LanthaScreen™ TR-FRET PR Coactivator Assay Kits were purchased from Life Technologies (e.g. Cat. #PV4685 for PPARdelta and PV4548 for PPARgamma). A terbium-labeled anti-GST

antibody is used to indirectly label a nuclear receptor by binding to its GST tag. When an agonist binds to the receptor, a conformational change takes place allowing a fluorescein-labeled co-activator to bind with high affinity. When the terbium label on the anti-GST antibody is excited at 340 nm, energy is transferred to the fluorescein label on the bound co-activator peptide and detected as emission at 520 nm.

The assays were performed in a final volume of 50  $\mu$ L per well in a 384-well solid black plate (PerkinElmer, Cat. #6007279). The components of the PPAR  $\delta$  assay were added in the following order: 0.25  $\mu$ L test compound in 100% DMSO, 50  $\mu$ L GST-PPAR $\delta$ -LBD, Tb-antiGST antibody and Fluorescein-C33 Peptide (final concentrations of 5 nM, 10 nM, 100 nM respectively). For antagonist activity an additional 0.25  $\mu$ L EC<sub>80</sub> agonist (GW0742, 10 nM final concentration) was added. The plates were incubated in the dark at room temperature for 2 hours and then read in a PerkinElmer Envision. The signal measured was the fluorescence ratio 520 nm/495 nm.

The components of the PPAR  $\gamma$  assay were added in the following order: 0.25  $\mu$ L test compounds in 100% DMSO, 50  $\mu$ L GST-PPAR $\gamma$ -LBD, Tb-antiGST antibody and Fluorescein-TRAP220/DRIP-2 Peptide (final concentrations of 2.5 nM, 2.5 nM, 125 nM respectively). For antagonist activity an additional 0.25  $\mu$ L EC<sub>80</sub> agonist (rosiglitazone, 50 nM final concentration) was added. The plates were incubated in the dark at room temperature for 2 hours and then read in a PerkinElmer Envision. The signal measured is the fluorescence ratio 520 nm/495 nm.

### **Dopamine D3 binding**

Wheatgerm agglutinin (WGA) scintillation proximity assay (SPA) beads (RPNQ0001) were purchased lyophilized from PerkinElmer (Boston, MA, USA). One vial (500 mg) was reconstituted using 5 mL of distilled water to give a final concentration of 100 mg/mL. Reconstituted SPA beads were stored at 4°C and not frozen. 384-well white, clear bottom plates (Cat. #3706) were purchased from Corning (Lowell, MA, USA). The incubations were performed in a final volume of 50  $\mu$ L per well in 384-well white, clear bottom polystyrene plates. The components of the incubation were added to each well in the following order and volumes: 0.25  $\mu$ L test compound / NSB / reference in 100 % DMSO; 9.75  $\mu$ L distilled water; 20  $\mu$ L radioligand; 20  $\mu$ L SPA bead / membrane mixture.

The final concentration of WGA beads was 4 mg/mL and that of D3 membranes (PerkinElmer Cat. #ES-173) was 10 µg/mL. The final concentration of the radioligand [<sup>3</sup>H]-Methylspiperone was 0.4 nM. Total binding was determined by adding DMSO and non-specific binding (NSB) was determined by the addition of (+)Butaclamol, final concentration 10 µM. The plates were then sealed and allowed to sit at room temperature for 5 hours of incubation time. Plates were counted in a PerkinElmer Microbeta Trilux reader for 90 seconds per well.

### **CDK2 kinase assay**

Kinase reactions was performed in automated fashion for profiling with several kinases in parallel with higher throughput. All assays were performed in 384 well microtiter plates. Each assay plate contained 8-point serial dilutions for 40 test compounds, as well as two 16-point serial dilutions of staurosporine as reference compound, plus 16 high- and 16 low controls. Protocol: 0.1 µl Compound, 9 µl 2x peptide/ATP solution, 9 µl 2x enzyme solution, incubate for 60 min at 30 °C, 70 µl stop/run buffer. Independent of the kinase, all reactions were performed in 50 mM HEPES, pH 7.5, 1mM DTT, 0.02% (v/v) Tween20, 0.02% (w/v) BSA, 0.5-1% (v/v) DMSO, 10 mM beta-glycerophosphate, and 10µM sodium orthovanadate. CDK specific conditions: [CDK2] 8.2nM, [ATP] 25uM, [peptide] 2uM, [ATP KM] 25uM, [Mg] 8mM. Percent-inhibition values were calculated as the following: The relative amount of phosphorylated peptide  $r$ , was calculated using the heights of the substrate peak,  $s$ , and the product peak,  $p$ :  $r = p/(p+s)$ . Percent inhibition was then determined as : %inhibition =

$$100 \cdot (1 - (r - r_{\text{low control}}) / (r_{\text{high control}} - r_{\text{low control}}))$$

### **Equilibrium solubility:**

Equilibrium solubility was determined using a miniaturized shake flask approach as described in Zhou et al.<sup>5</sup> Aliquots of 10 mM DMSO compound solution were dispensed in triplicate in 96-well polypropylene plates. The DMSO was removed using a GeneVac HT4X evaporator for approximately one hour. Media (pH 4.0 buffer, pH 6.8 buffer, FaSSIF: Fasted State Simulated Intestinal Fluid) was added to each well to achieve a target concentration of 1 mM. The plate was sealed and shaken for a minimum of 16 hours, then centrifuged for phase separation. An aliquot of supernatant was transferred to a new plate, where it was further diluted for subsequent analysis. Quantification of solubility was performed using RapidFire/MS/MS and a four-point

calibration curve. Experimental variability was determined from approximately 300 duplicate measurements from different days and experimentalists, with a log standard deviation of 0.25.

### **HT logD:**

Dried DMSO stock samples were incubated with buffer and 1-octanol and shaken for at least 4 hours. Sample preparation and phase separation were automated using centrifugation and liquid handling workstations. Both 1-octanol and buffer phases were quantified in triplicate and logD was derived from the ratio of peak area responses against an internal standard in a tandem mass spectrometer. To obtain logP, the buffer pH was selected where the compound was unionized, based on calculated pKa values.

### **PAMPA Assay:<sup>6</sup>**

Permeation experiments were carried out in 96-well microtiter filter plates obtained from Millipore AG (Volketswil, Switzerland). Filter (isopore, polycarbonate) specifications were as follows: 3  $\mu\text{m}$  pore size, 9-10  $\mu\text{m}$  thickness, and 5-20% porosity. Each well of the filter plate was impregnated with 15  $\mu\text{L}$  of 5% hexadecane dissolved in hexane (i.e., total amount of hexadecane: 0.75  $\mu\text{L}$ ) for at least 10 min to allow for complete evaporation of the hexane. Subsequently, the donor compartments were hydrated with 300  $\mu\text{L}$  of 50  $\mu\text{g}/\text{mL}$  test compound in buffer, containing 5% DMSO and 100 mM KCl, and connected to a homemade Teflon acceptor plate which had been prefilled with buffer containing 5% DMSO. The resulting sandwich construct was incubated at room temperature under constant light shaking (50-100 rpm). After 5 h, the sandwich was disassembled and the solution in the acceptor was transferred to a disposable UV-transparent plate (Corning Costar, Corning, NY). UV absorption was measured with a SPECTRAMax190 microplate spectrophotometer (Molecular Devices Corp., Sunnyvale, CA) at absorption wavelengths between 260 and 290 nm. To ensure that the donor/acceptor fluxes were not due to porous or unstable hexadecane layers, the stability of the hexadecane membranes was tested at the end of the incubation period by electrical resistance measurements. Wells with barriers which displayed electrical resistance lower than 5 k $\Omega$  were discarded. Electrical resistance measurements were performed using a Keithley 6517A electrometer (Keithley Instruments S.A., Dubendorf, Switzerland) with Ag/AgCl electrodes from World Precision Instruments (Berlin, Germany). Ionization constants were measured by potentiometric titration in

0.15 M KCl at 25.0 °C using a GIpKa instrument (Sirius Analytical Instruments, Forest Row, U.K.). Partition and distribution coefficients were measured using the pH metric technique using a PCA101 automatic titrator (Sirius Analytical Instruments, Forest Row, U.K.).

At the end of the incubation period the sandwich was carefully disassembled, the acceptor plate measured with the UV microtiter plate spectrophotometer, and the donor plate submitted to current measurements to assess the integrity of the hexadecane membranes. The apparent permeability value  $P_a$  is determined from the ratio  $r$  of the absorbance of compound found in the acceptor chamber divided by the theoretical equilibrium absorbance (determined independently):

$$P_a = -\frac{V_D}{(V_D + V_R)At} \cdot \ln(1 - r) \quad (1)$$

In this equation,  $V_R$  is the volume of the acceptor compartment (0.4 cm<sup>3</sup>),  $V_D$  is the donor volume (0.3 cm<sup>3</sup>),  $A$  is the accessible filter area (total filter area, 0.24 cm<sup>2</sup>, multiplied by a porosity ratio of 20%), and  $t$  is the incubation time. Equation 1 is obtained from the differential equation (2) with  $c_D(t)$  being the compound concentration in the donor compartment and  $c_R(t)$  being the concentration in the acceptor compartment. In absence of membrane retention  $P_a$  is identical to  $P_e$ , the effective membrane permeability. When membrane retention occurs  $P_a$  can be converted to  $P_e$  using mass balance equations.

$$\frac{dc_R}{dt} = \frac{P_a A}{V_R} (c_D - c_R) \quad (2)$$

### ***Molecular modeling:***

Docking poses were generated in a high resolution crystal structure of CDK2/cyclin A (PDB entry 1VYW) using Glide (version 6.6) from Schrödinger. The crystal structure was first prepared using the standard protein preparation wizard within the Maestro interface. Grid files were generated for docking after deleting the crystallographic water molecules. 3D-geometries of the ligands **BN-3** and **CC-3** were generated using ligprep. Compounds were docked in the pre-generated grid files in extra precision mode. Three docking poses were saved for each of the compounds and the docking results were analyzed visually. The robustness of the docking



protocol was confirmed by self-docking and cross-docking studies of the known CDK2 ligands from crystal structures. Geometry of the C-B bond in BN-3 was verified by comparing with the small molecule x-ray of 1,2-dihydro-2-phenyl-1,2-azaborine (CSD code WAJTEH).<sup>7</sup>

## References

1. M. Leopoldo, E. Lacivita, N. A. Colabufo, M. Contino, F. Berardi, R. Perrone, *J. Med. Chem.* **2005**, *48*, 7919-7922.
2. B. G. Shearer, R. W. Wiethe, A. Ashe, A. N. Billin, J. M. Way, T. B. Stanley, C. D. Wagner, R. X. Xu, L. M. Leesnitzer, R. V. Merrihew, T. W. Shearer, M. R. Jeune, J. C. Ulrich, T. M. Willson, *J. Med. Chem.* **2010**, *53*, 1857–1861.
3. (a) W. Seelen, M. Schafer, A. Ernsta, *Tetrahedron Lett.* **2003**, *44*, 4491–4493. (b) P. Pevarello, P. Orsini, G. Traquandi, M. Varasi, E. L. Fritzen, M. A. Warpehoski, B. S. Pierce, M. G. Brasca, US 7034049 B1, April 25, 2006. (c) P. Pevarello, M. G. Brasca, R. Amici, P. Orsini, G. Traquandi, L. Corti, C. Piutti, P. Sansonna, M. Villa, B. S. Pierce, M. Pulici, P. Giordano, K. Martina, E. L. Fritzen, R. A. Nugent, E. Casale, A. Cameron, M. Ciomei, F. Roletto, A. Isacchi, G. Fogliatto, E. Pesenti, W. Pastori, A. Marsiglio, K. L. Leach, P. M. Clare, F. Fiorentini, M. Varasi, A. Vulpetti, M. A. Warpehoski, *J. Med. Chem.* **2004**, *47*, 3367-3380.
4. A. N. Lamm, S.-Y. Liu, *Mol. Biosyst.* **2009**, *5*, 1303-1305.
5. L. Zhou, L. Yang, S. Tilton, J. Wang, *J. Pharm. Sci.* **2007**, *96*, 3052-3071.
6. F. Wohnsland, B. Faller, *J. Med. Chem.* **2001**, *44*, 923-930.
7. J. Pan, J. W. Kampf, A. J. Ashe, *Organometallics* **2004**, *23*, 5626-5629.

NO INOVA-300 standard 1H

expt1 PROTON

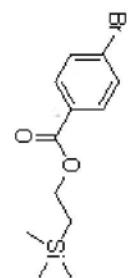

SAMPLE PRESATURATION  
 date Oct 18 2013 satmode n  
 solvent cd2cl2 wet n  
 file exp SPECIAL  
 ACQUISITION temp 25.0  
 sw 4799.0 gain not used  
 at 3.000 spin not used  
 np 28794 hst 0.008  
 fb 3000 pw90 9.400  
 bs 4 alfa 10.000  
 d1 1.000 FLAGS  
 nt 8 i1 n  
 ct 8 in n  
 TRANSMITTER dp y  
 tn H1 bs nm  
 srfq 299.935 PROCESSING  
 tof 299.9 fn not used  
 tpwr 59 DISPLAY  
 pw 4.700 sp -599.6  
 DECOUPLER wp 4798.7  
 dn C13 rfi 599.9  
 dof 0 rfp 0  
 dm nnn xp 123.5  
 decwve w40\_RCN5mm 1p -43.7  
 dpwr 33 PLOT  
 dmf 26316 wc 215  
 sc 35  
 vs 76  
 th  
 ai cdc ph 6

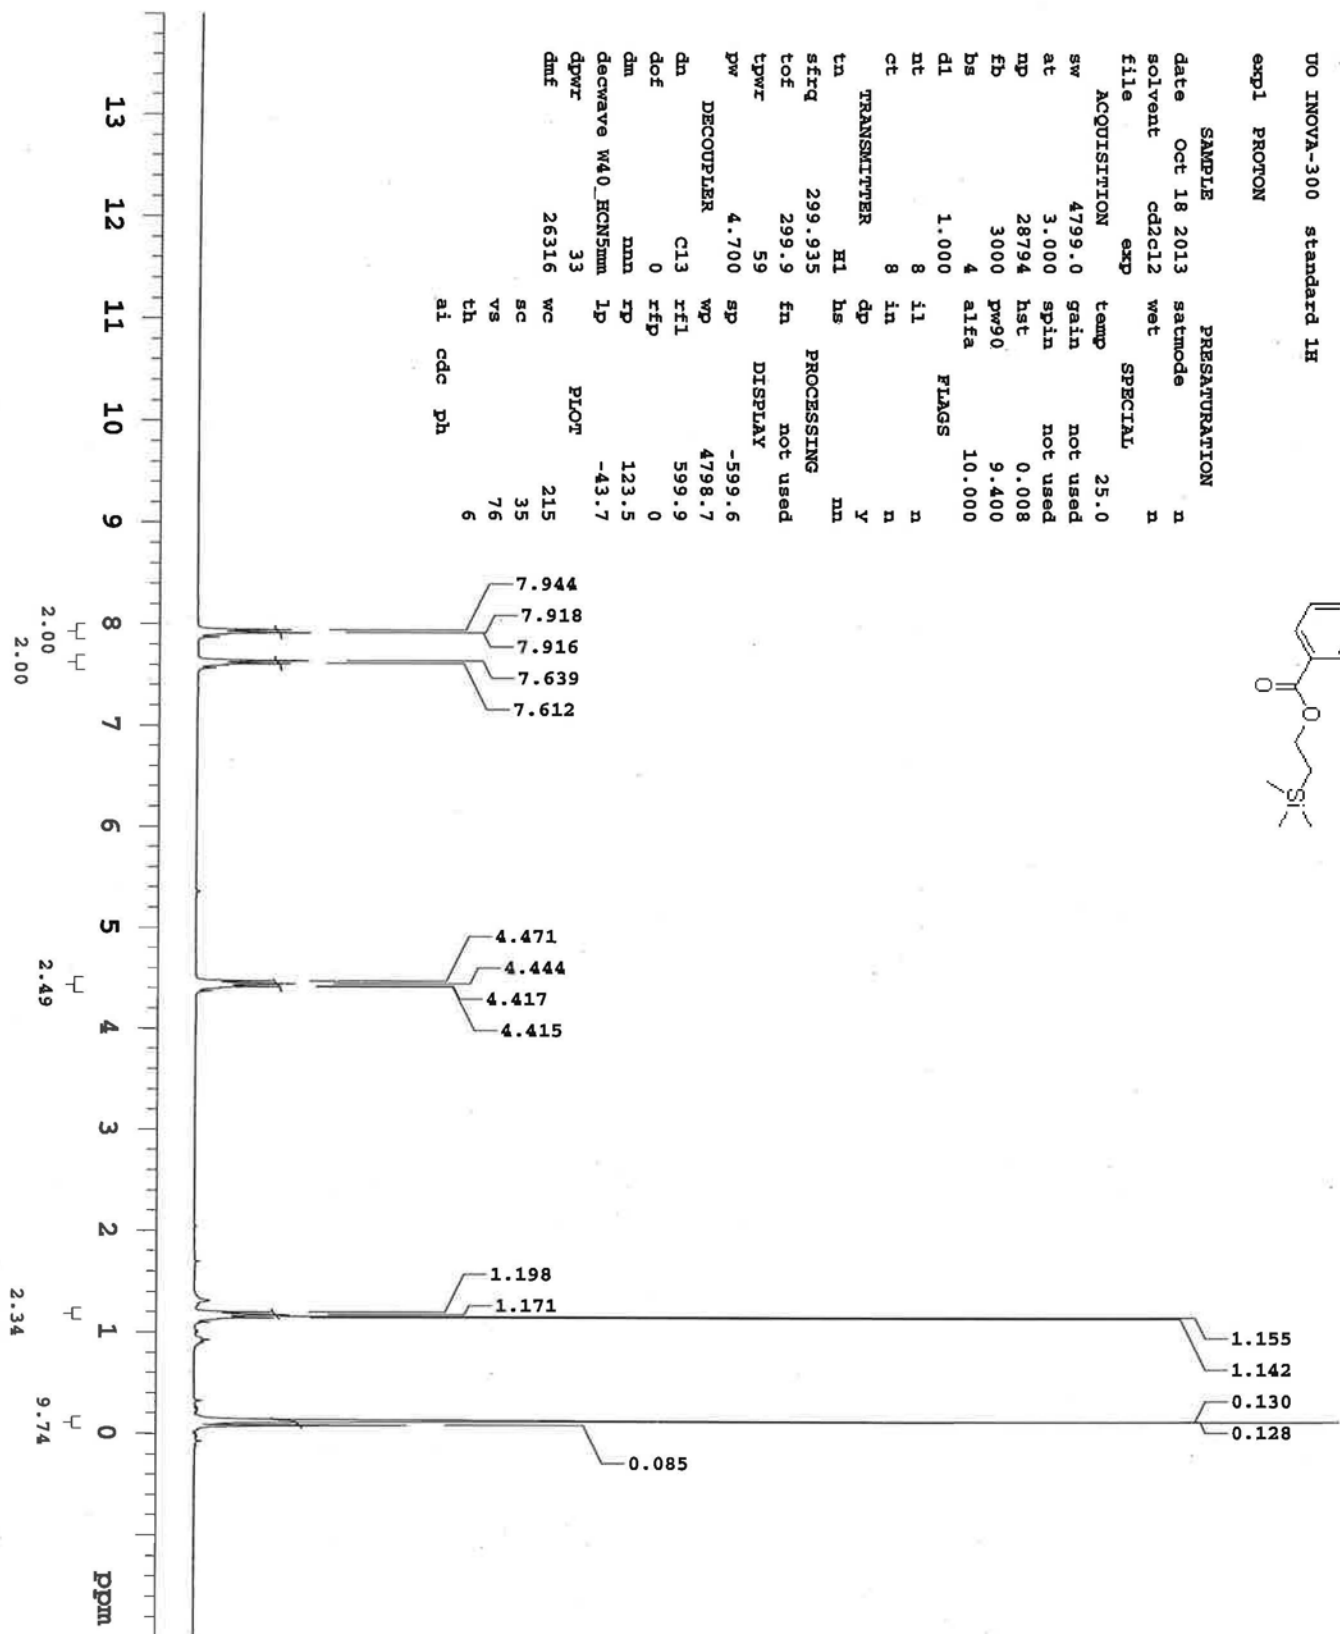

UO Inova-500 Carbon-13

exptl CARBON

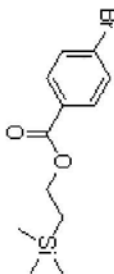

SAMPLE PRESATURATION  
 date Oct 18 2013 satmode n  
 solvent cd2cl2 wet n  
 file exp SPECIAL  
 ACQUISITION temp 25.0  
 sw 31434.2 gain 60  
 at 1.000 spin not used  
 np 62868 hst 0.008  
 fb 17000 pw90 9.900  
 bs 4 alfa 0  
 d1 1.000 FLAGS  
 nt 1600 il n  
 ct 108 in n  
 TRANSMITTER dp y  
 tn C13 hs nm  
 sfrq 125.765 PROCESSING  
 tof 1914.9 lb 1.00  
 tpwr 52 fn not used  
 pw 4.950 DISPLAY  
 DECOUPLER sp -1883.4  
 dn H1 wp 31433.2  
 dof 0 rfl 1884.4  
 dm YYY rfp 0  
 decwve w ip 14.1  
 dpwr 39 lp -104.6  
 dmf 12300 PLOW  
 wc 250  
 sc 0  
 vs 155  
 th 8  
 nm cdc ph

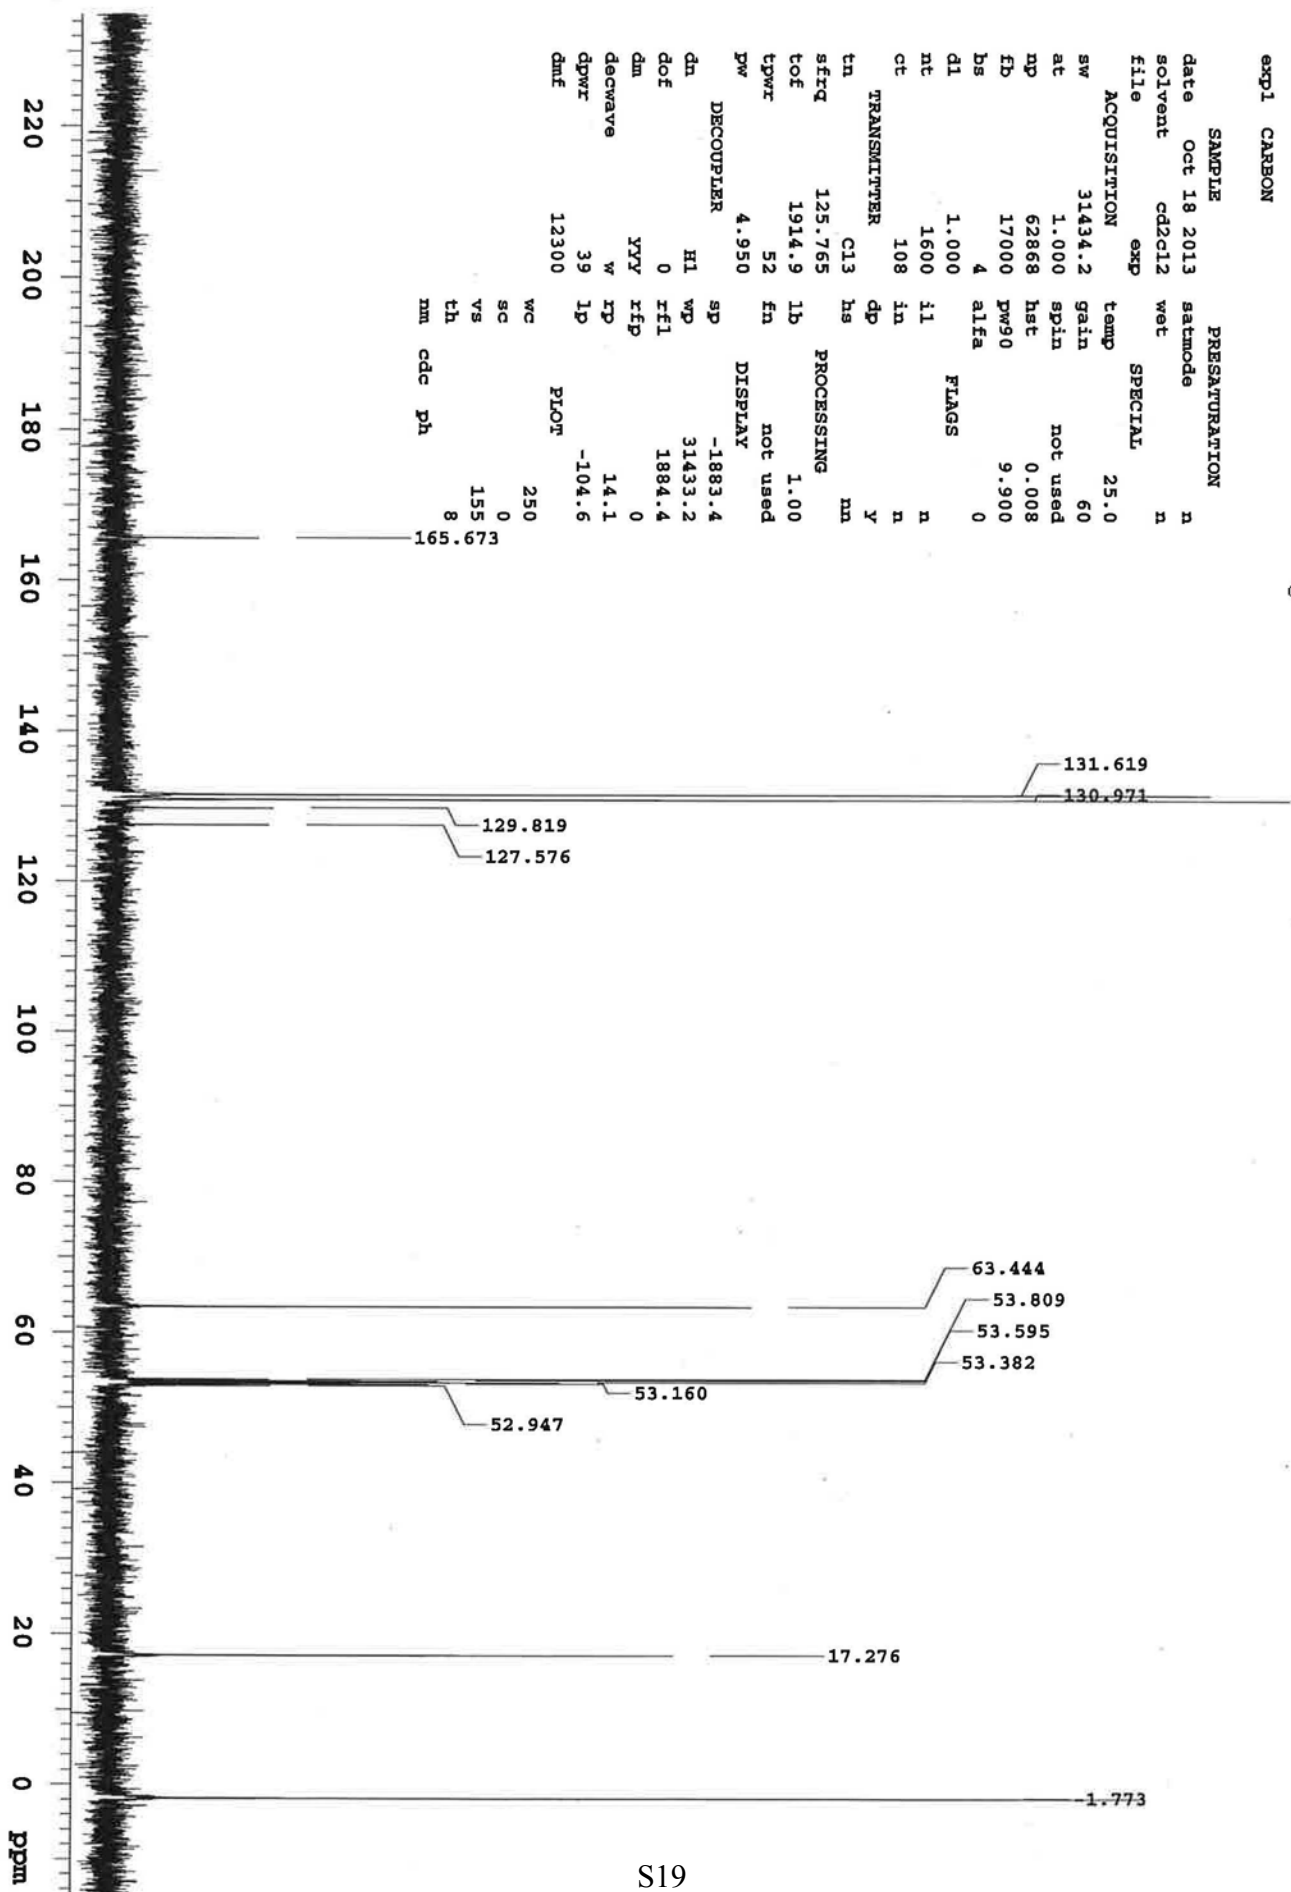

exp6 PROTON

SAMPLE PRESATURATION

date May 3 2016 satmode n

solvent cd2cl2 wet n

file exp SPECIAL

ACQUISITION temp 25.0

sw 6410.3 gain 46

at 2.556 spin 0

np 32768 hst 0.008

fb 4000 pw90 8.700

bs 32 alfa 10.000

d1 1.000 FLAGS

nt 8 i1 n

ct 8 in n

tpw 62 DISPLAY

sfreq 399.769 PROCESSING

tof 399.7 fn not used

pw 4.350 sp -806.2

DECOUPLER C13 wp 6409.9

dn 0 rfl 806.6

dof 0 rfp 0

dm nm rp 9.0

decays W40\_AutoX\_~ lp 0

DB\_FPG\_MR0902M042 PIOT

dpwr 39 wc 234

dmf 29412 sc 8

vs 173

th 7

ai cdc ph

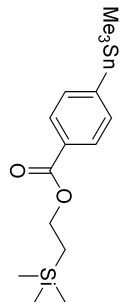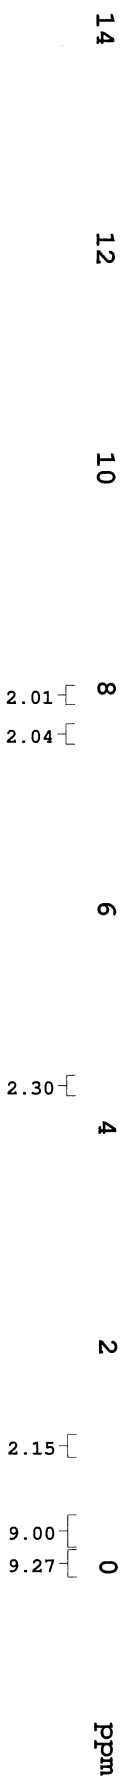

UO Inova-500 Carbon-13

exptl CARBON

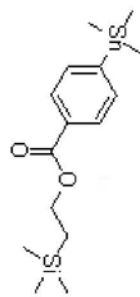

SAMPLE PRESATURATION  
 date Nov 7 2013 satmode n  
 solvent cd2cl2 wet n  
 file exp SPECIAL  
 ACQUISITION temp 25.0  
 sw 31434.2 gain 60  
 at 1.000 spin not used  
 np 62868 hst 0.008  
 fb 17000 pw90 9.900  
 bs 4 alfa 0  
 dl 1.000 FLAGS  
 nt 5000 i1 n  
 ct 944 in n  
 tn C13 hs y  
 srfq 125.765 PROCESSING nm  
 tof 1914.9 lb 1.00  
 tpwr 52 fn not used  
 pw 4.950 DISPLAY  
 DECOUPLER sp -1883.4  
 dn H1 wp 31433.2  
 dof 0 rfi 1884.4  
 dm yyy rfp 0  
 decwave w ip -62.4  
 dpwr 39 lp -101.3  
 dmf 12300 PLOT  
 wc 250  
 sc 0  
 vs 150  
 th 13  
 nm cdc ph

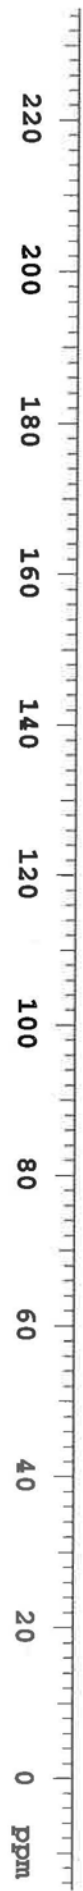

UO Inova-300-North standard 1H

exptl PROTON

SAMPLE PRESATURATION

date Oct 20 2013 satmode n  
solvent cd2cl2 wet n  
file exp SPECIAL

ACQUISITION temp not used

sw 4800.8 gain not used  
at 3.000 spin not used

np 28804 hst 0.008  
fb 3000 pw90 9.000  
bs 4 alfa 10.000

d1 1.000 FLAGS  
nt 8 il n  
ct 8 in n

tn TRANSMITTER H1 hs y  
sfrq 300.053 PROCESSING nm  
tof 300.0 fn not used

tpwr 57 DISPLAY  
pw 4.500 SP -599.8

DECOUPLER WP 4800.5  
dn C13 rfil 600.1

dof 0 rfp 0  
dm mm tp -74.2

decouple W40\_HCN5mm 1p -38.8

dmf 32258 PLOT  
wc 215  
sc 35  
vs 104  
th 2

ai cdc ph

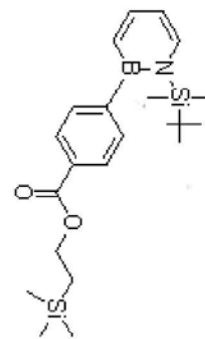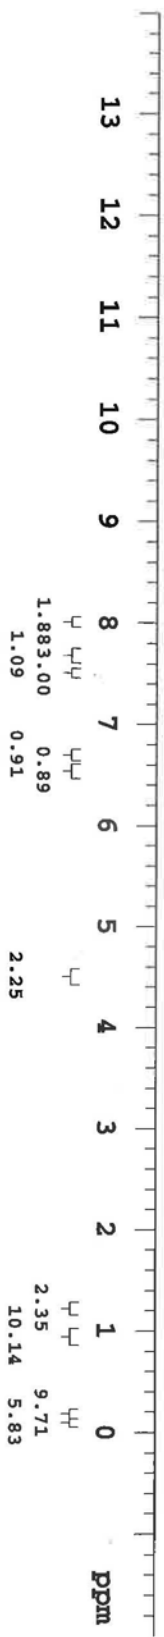

DU Inova-500 Carbon-13

expt1 CARBON

SAMPLE PRESATURATION  
 date Oct 20 2013 satmode n  
 solvent cd2cl2 wet n  
 file /net/hotmax/d- SPECIAL  
 ata/people/peng/vn- temp 25.0  
 mdata/peng-1-289C- gain 60  
 -2.fid spin not used  
 ACQUISITION hst 0.008  
 sw 31434.2 pw90 9.900  
 at 1.000 alfa 0  
 np 62868 FLAGS  
 fb 17000 fl n  
 bs 4 fn n  
 dl 1.000 dp y  
 nt 3000 hs nm  
 ct 468 PROCESSING  
 lb 1.00  
 tn c13 fn not used  
 s1rq 125.765 DISPLAY  
 .tof 1914.9 sp -1883.4  
 tpwr 52 wp 31433.2  
 pw 4.950 rfi 1884.4  
 DECOUPLER rfp 0  
 dn H1 rp -61.0  
 dof 0 lp -98.8  
 dm YYY PLOT  
 decwve w wc 234  
 dpwr 39 sc 8  
 dmf 12300 vs 132  
 th ai cdc ph 6

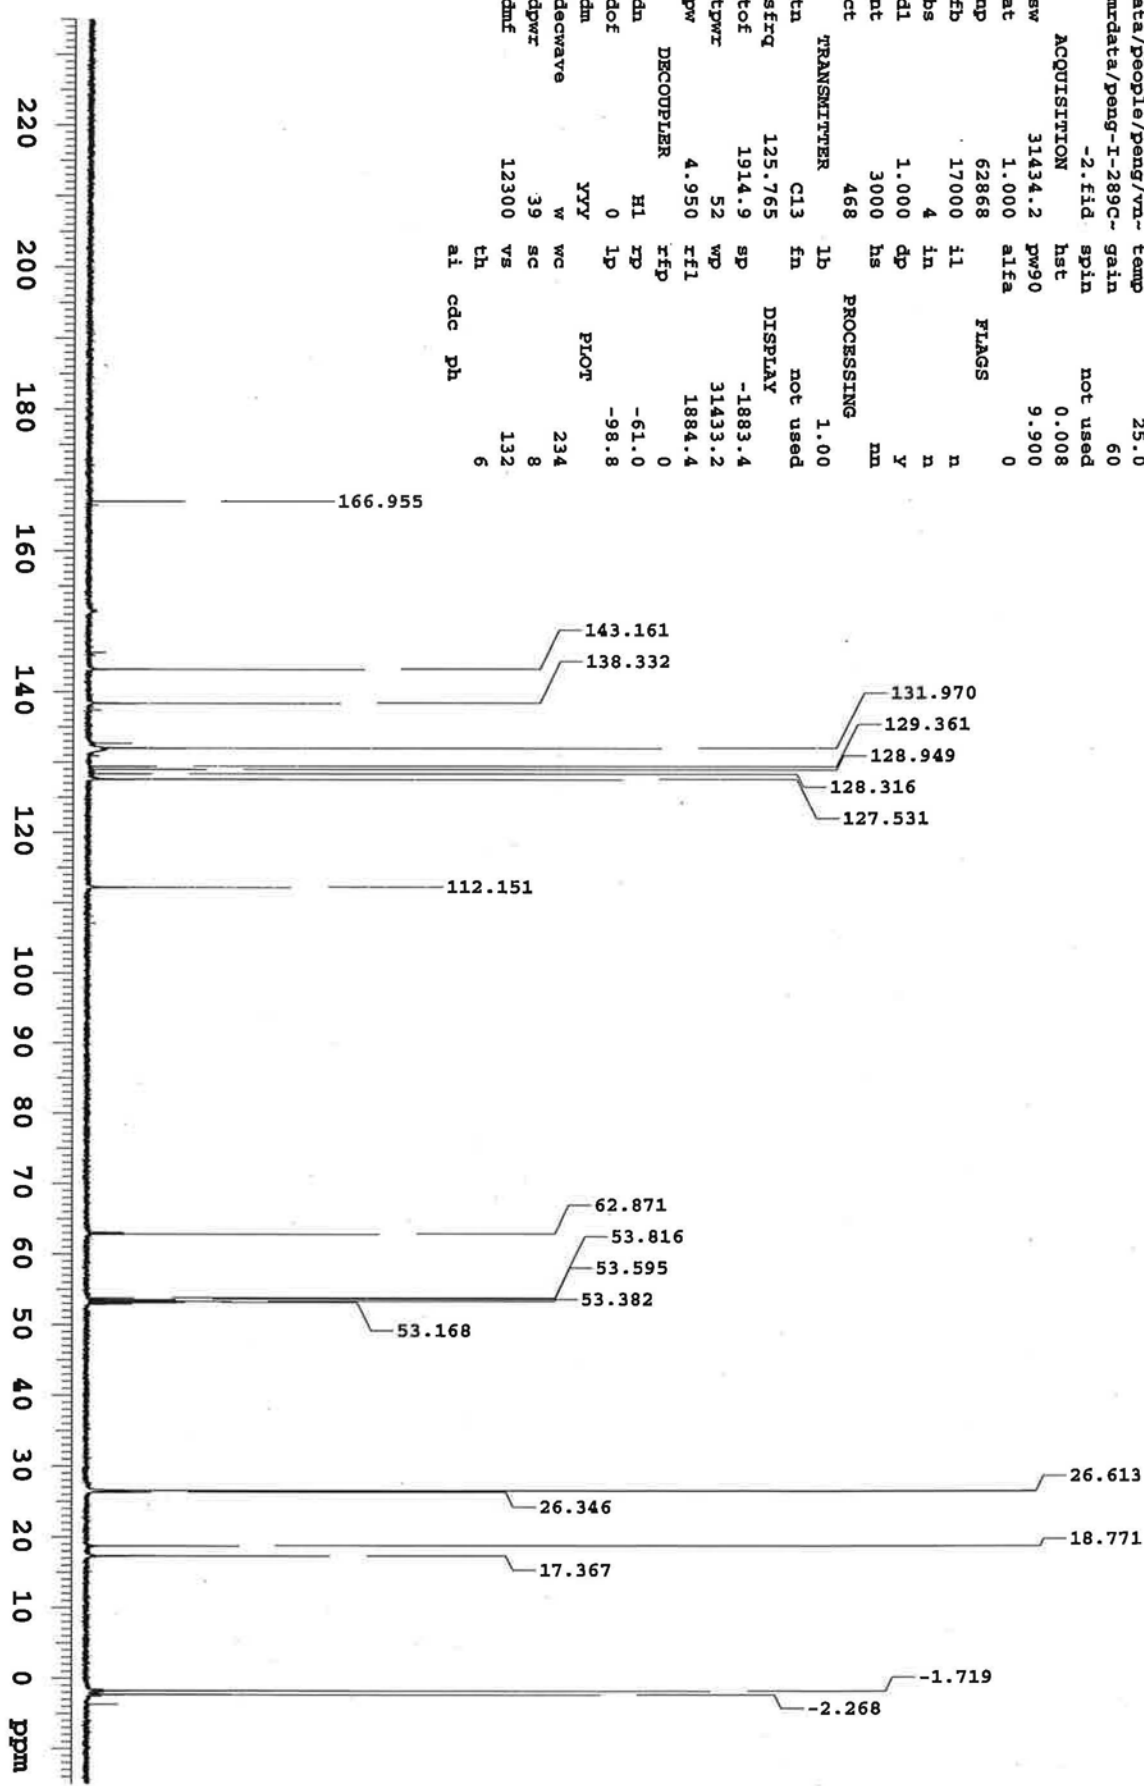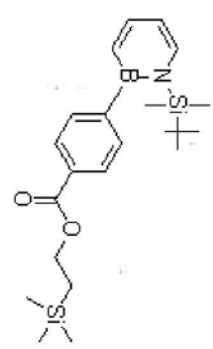

UO Inova-300-North Boron-11

exptl Boron-11

|             |            |            |          |
|-------------|------------|------------|----------|
| date        | Nov 7 2013 | satmode    | n        |
| solvent     | cd2cl2     | wet        | n        |
| file        | exp        | SPECIAL    |          |
| ACQUISITION | temp       | not used   |          |
| sw          | 40000.0    | gain       | 20       |
| at          | 0.200      | spin       | not used |
| np          | 16000      | hst        | 0.008    |
| fb          | 22000      | pw90       | 10.000   |
| bs          | 8          | alfa       | 0        |
| d1          | 0.200      | FLAGS      |          |
| nt          | 2000       | i1         | n        |
| ct          | 184        | in         | n        |
| TRANSMITTER | dp         | y          |          |
| tn          | B11        | hs         | nm       |
| sfrq        | 96.268     | PROCESSING |          |
| tof         | 2891.6     | lb         | 10.00    |
| tpwr        | 58         | fn         | not used |
| pw          | 8.000      | DISPLAY    |          |
| DECOUPLER   | sp         | -19995.1   |          |
| dn          | H1         | wp         | 39995.1  |
| dof         | 0          | rfl        | 20000.0  |
| dm          | nm         | rfd        | 0        |
| decwave     | w          | rp         | -27.9    |
| dpwr        | 36         | lp         | -28.8    |
| dmf         | 10940      | PILOT      |          |
|             | wc         | 250        |          |
|             | sc         | 0          |          |
|             | vs         | 331239     |          |
|             | th         | 38         |          |
|             | al         | cdc        | ph       |

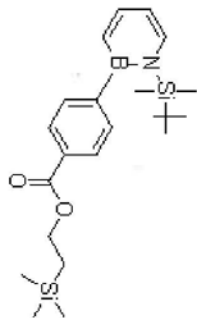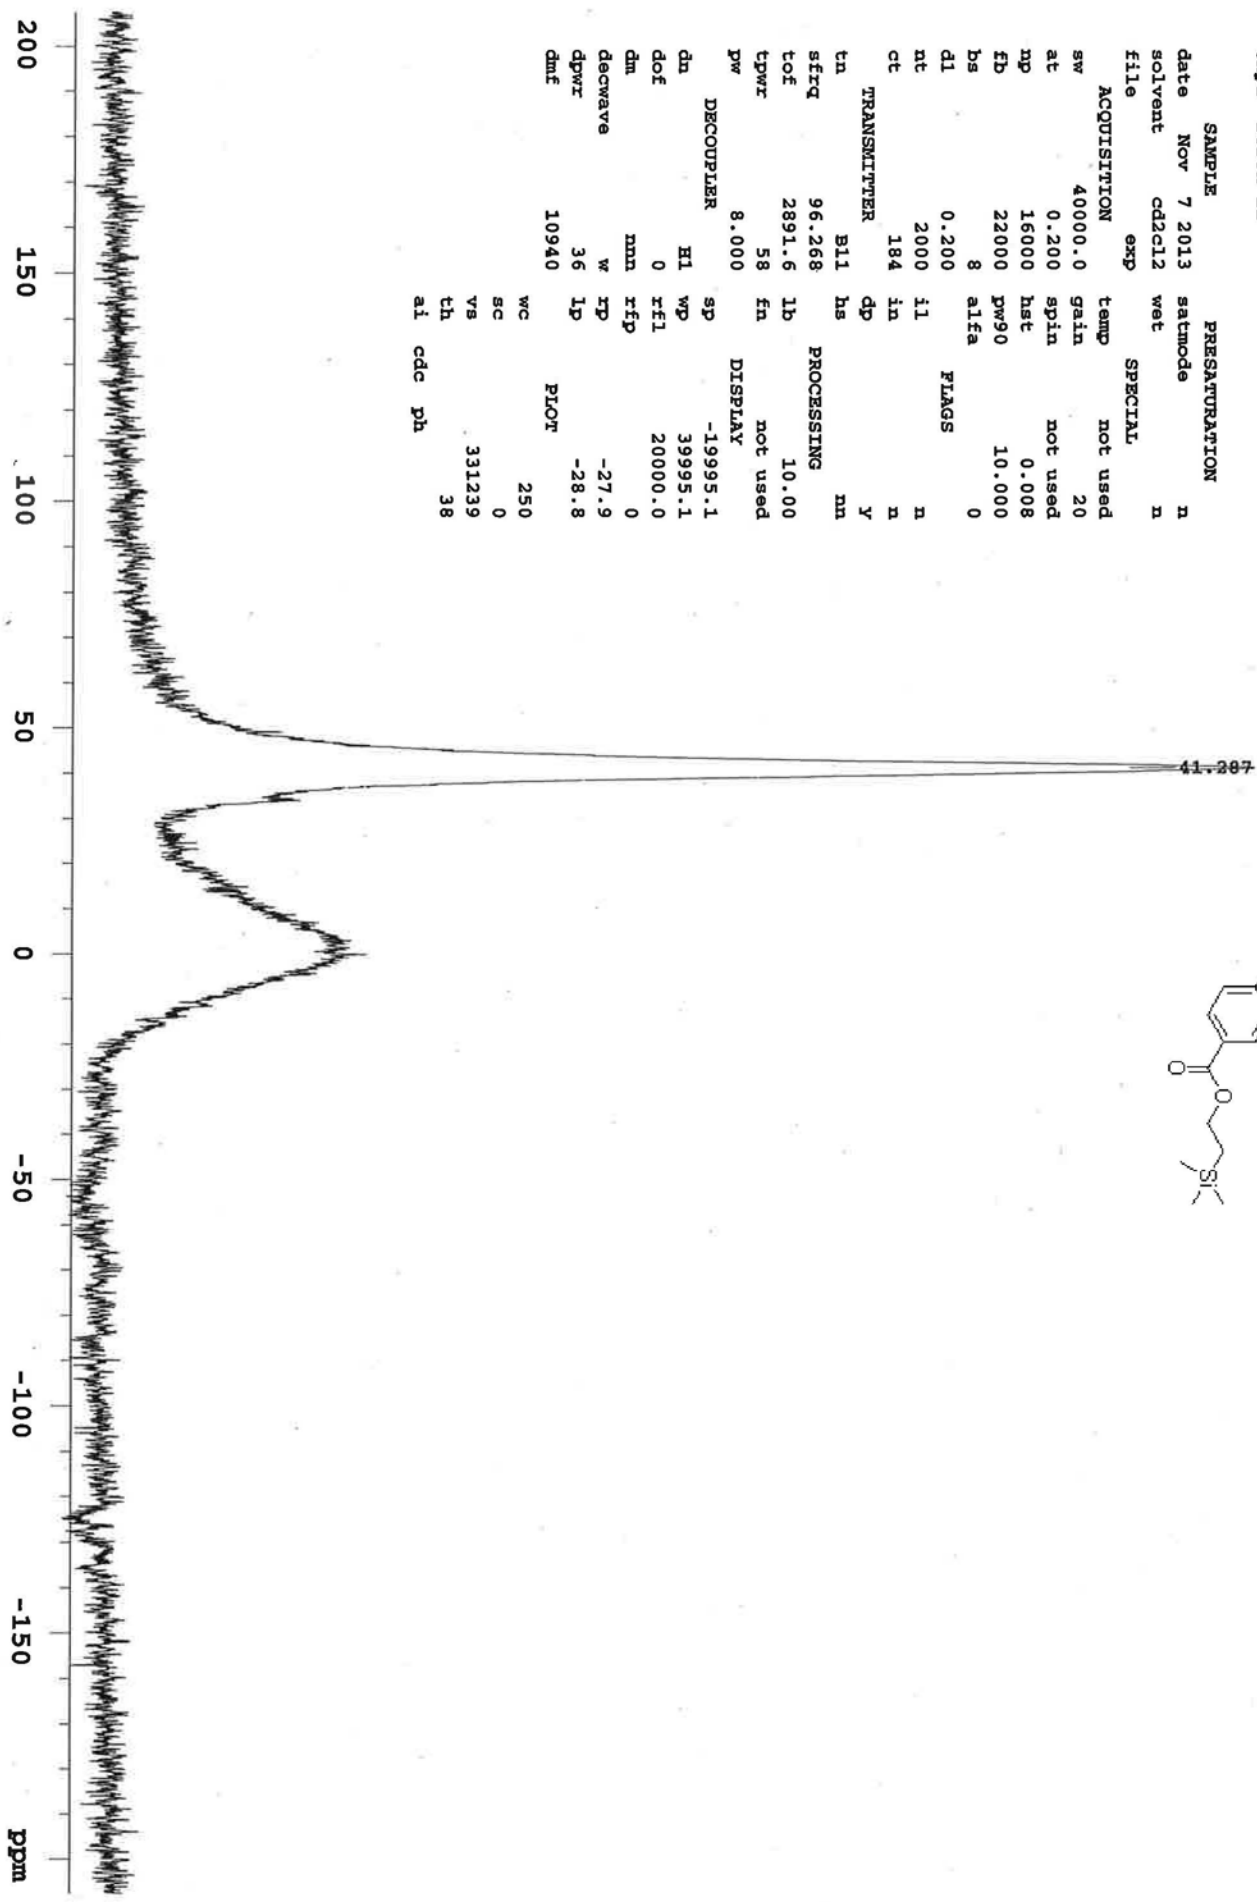



sxu-10-155-B11-crude

exp2 PROTON

*Handwritten notes:*  
E-11  
B-11  
CONF

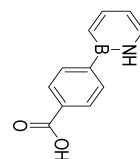

|             |             |         |          |
|-------------|-------------|---------|----------|
| date        | Jan 17 2014 | satmode | n        |
| solvent     | acetone     | wet     | n        |
| file        | exp         | SPECIAL |          |
| ACQUISITION | exp         | temp    | 25.0     |
| sw          | 8012.8      | gain    | 30       |
| at          | 2.045       | Spin    | 20       |
| np          | 32768       | hst     | 0.008    |
| fd          | 4000        | pw90    | 8.900    |
| bs          | 32          | alfa    | 10.000   |
| di          | 1.000       | FLAGS   |          |
| nt          | 8           | i1      | n        |
| ct          | 8           | in      | n        |
| tn          | TRANSMITTER | dp      | v        |
| stfq        | 499.886     | hs      | nn       |
| tof         | 499.8       | fn      | not used |
| tpwr        | 59          | DISP    | not used |
| pw          | 4.450       | sp      | -1006.6  |
| dn          | DECOUPLER   | wp      | 8012.3   |
| dof         | 0           | rfl     | 1007.1   |
| dm          | nn          | rffp    | 0        |
| decwave     | v40_HCNsm   | tp      | -31.7    |
| dpwr        | 35          | TP      | 0        |
| dmf         | 32258       | WC      | PLOT     |
|             |             | SC      | 250      |
|             |             | VS      | 0        |
|             |             | th      | 1077     |
|             |             | ai      | 1        |
|             |             | cdc     | ph       |

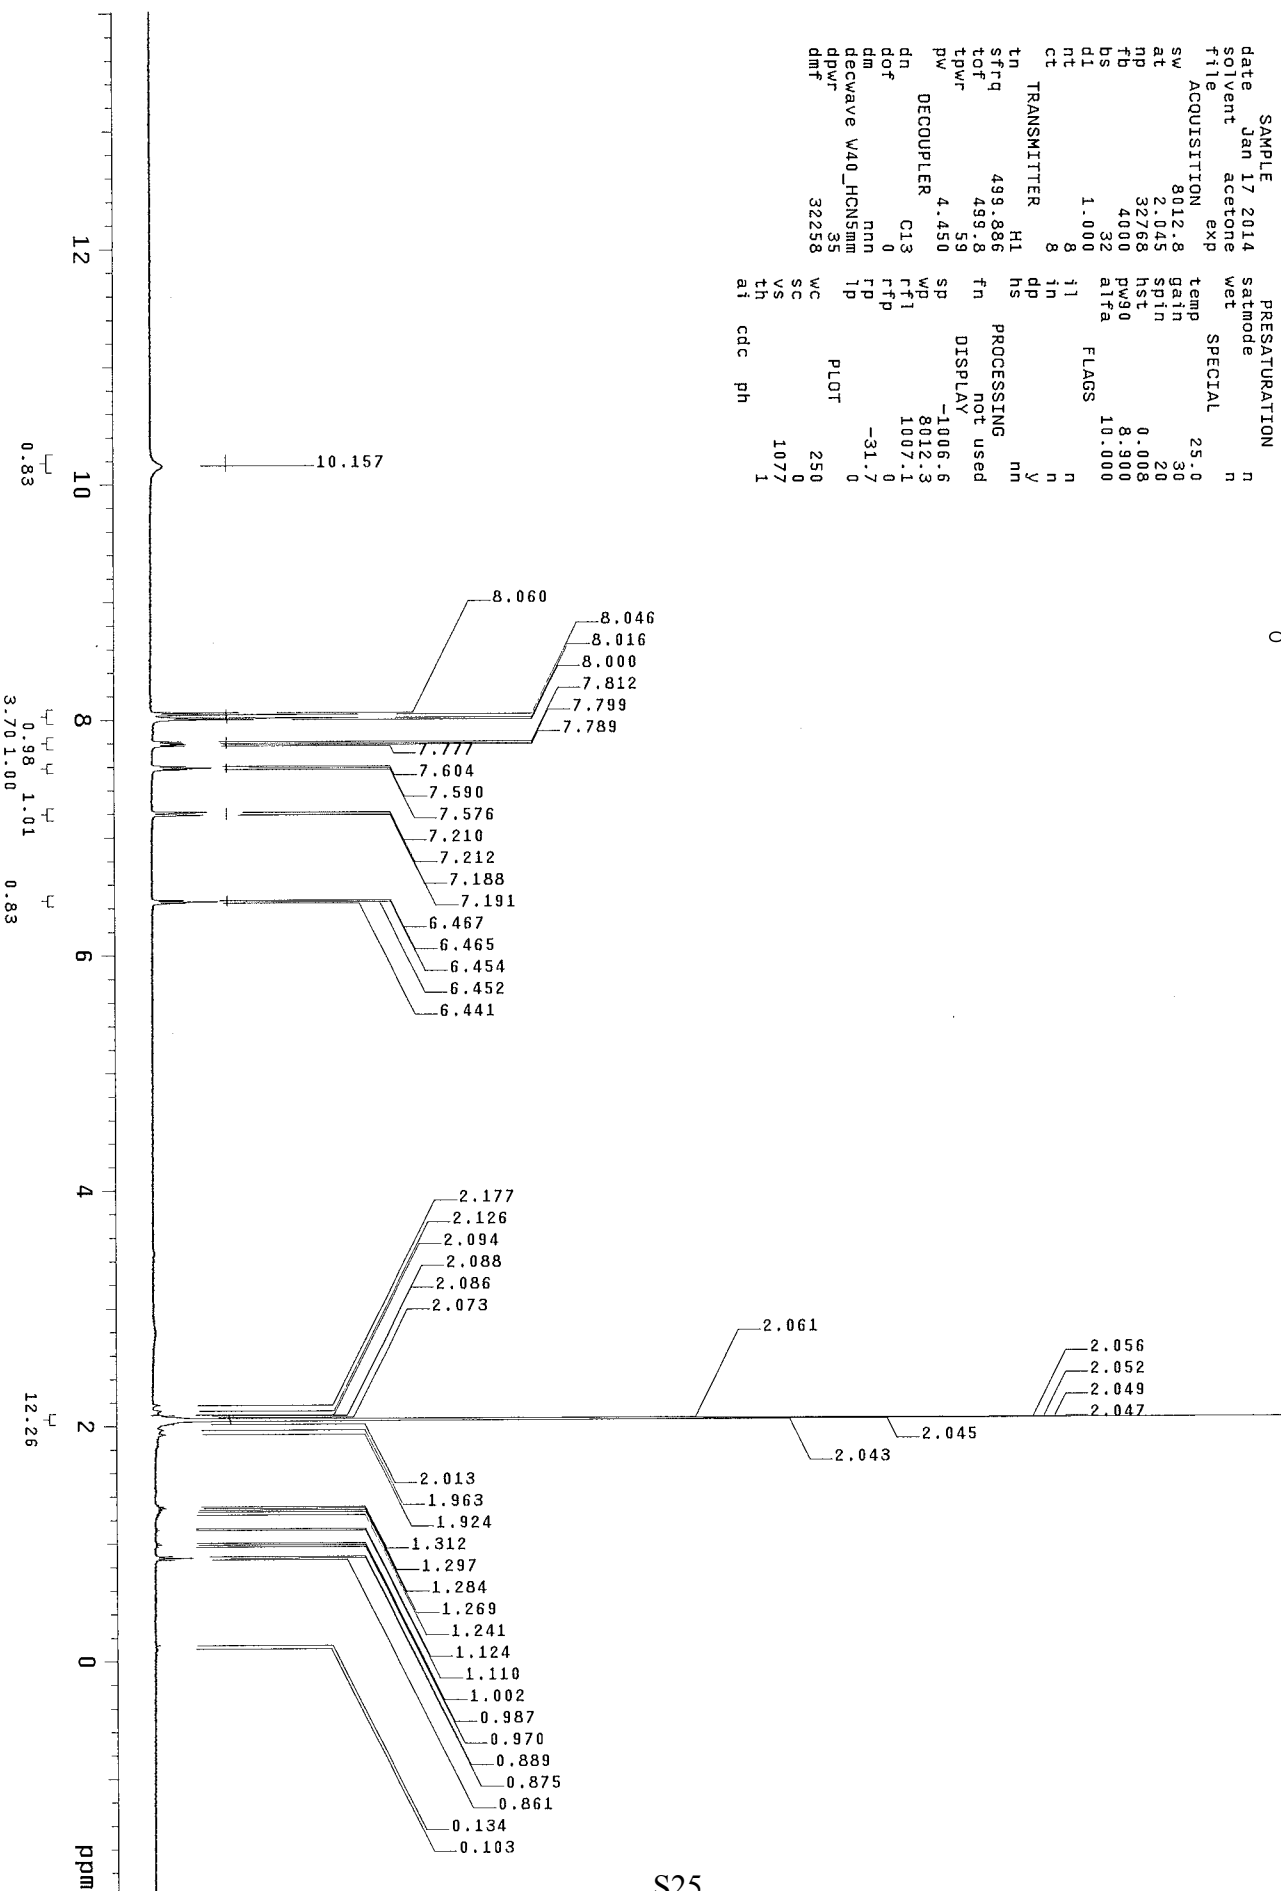

UN Inova-500 Carbon-13

exp1 CARBON

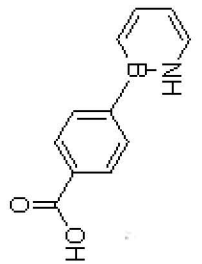

SAMPLE PRESATURATION

date Nov 5 2013 satmode n

solvent acetone wet n

file 0 exp SPECIAL

ACQUISITION 1 temp 25.0

sw 31433.2 gain 60

at 1.000 spin not used

mp 62868 hst 0.008

fb 17000 pw90 9.900

bs 4 alfa 0

d1 1.000 i1 FLAGS

nt 5000 i1 n

ct 748 in n

TRANSMITTER dp y

tn C13 hs nm

sfrq 125.766 PROCESSING

tof 1914.8 lb 1.00

tpwr 52 fn not used

pw 4.950 DISPLAY

DECOUPLER sp -1883.4

dn H1 wp 31433.2

dof 0 rfl 1884.4

dm YYY rfp 0

decwve w ip -3.0

dpr 39 lp -96.0

dmf 12300 PLOT

wc 250

sc 0

vs 155

th 3

nm cdc ph

220 200 180 160 140 120 100 80 60 40 20 0 ppm

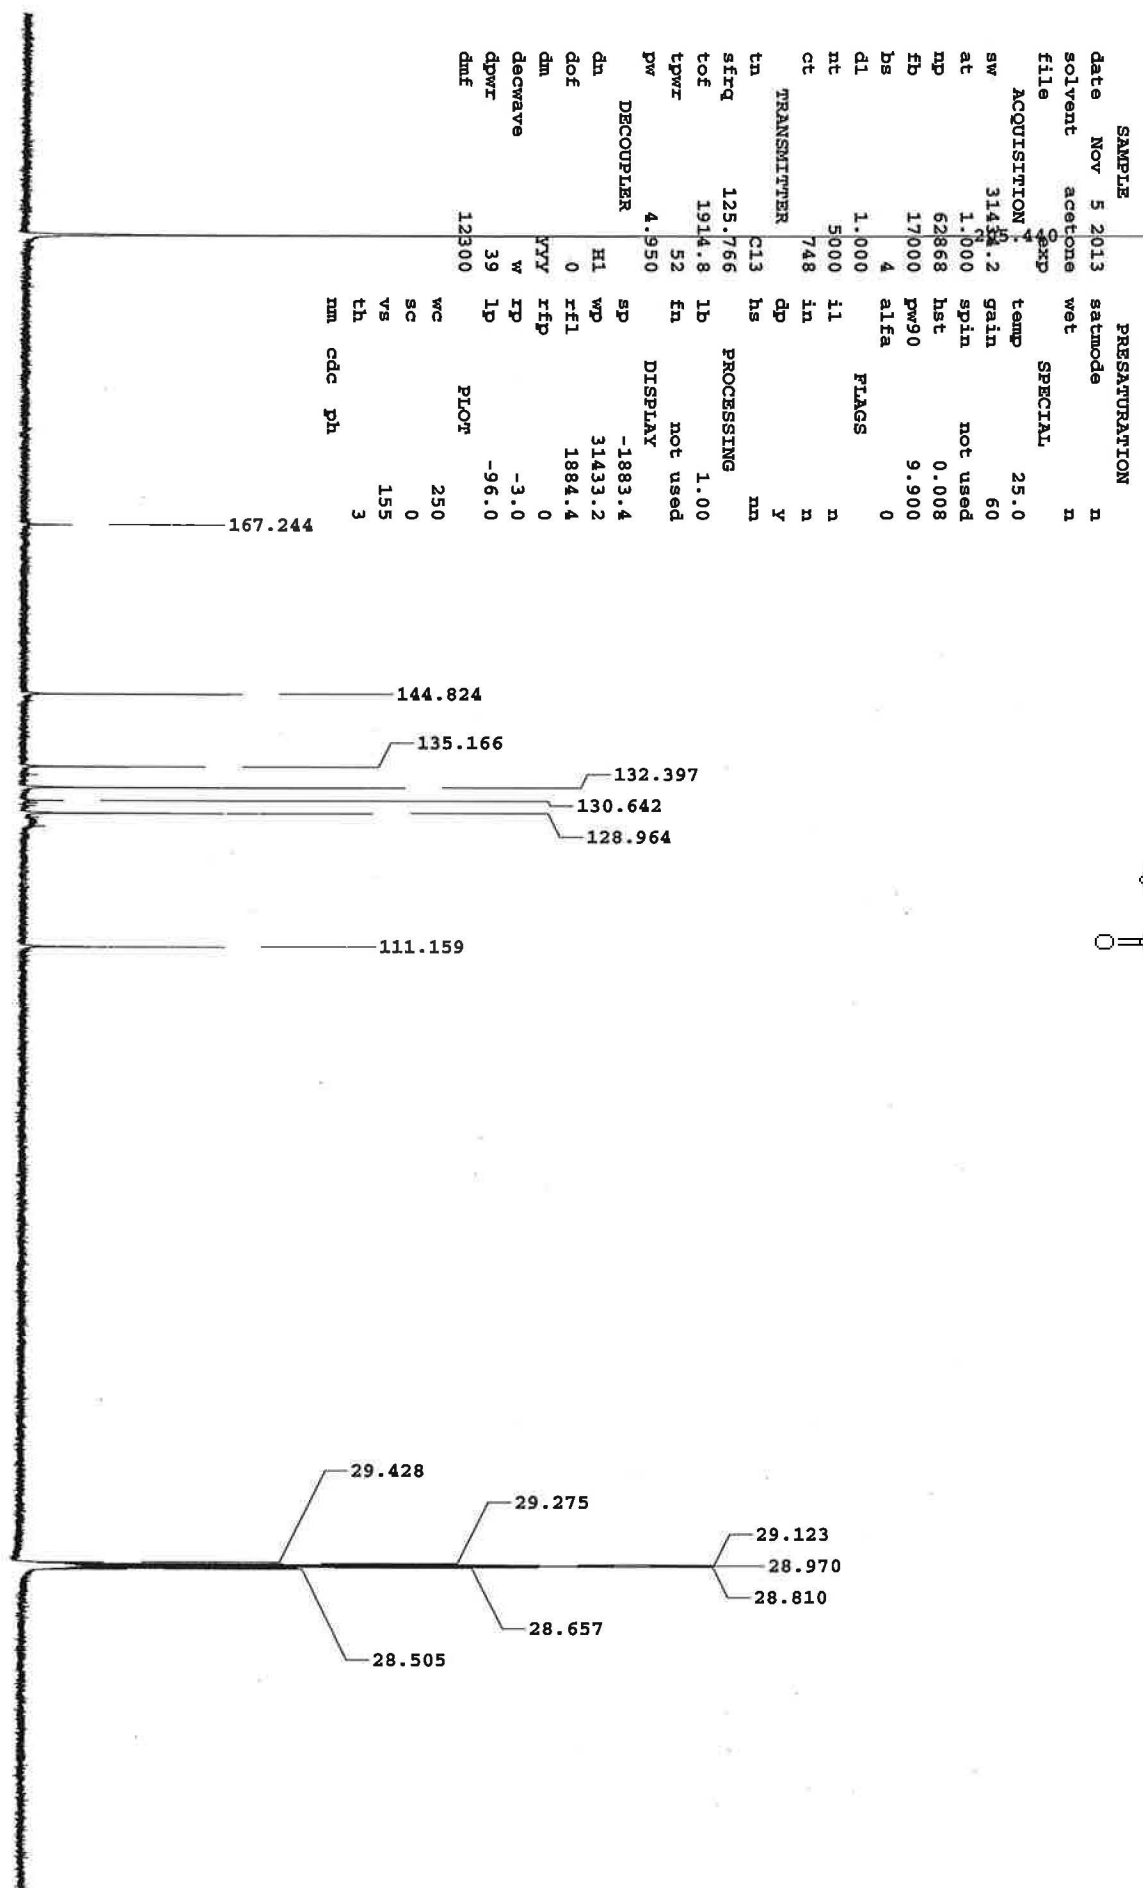

UO Inova-300-North Boron-11

exp1 Boron-11

SAMPLE PRESATURATION

|         |            |         |   |
|---------|------------|---------|---|
| date    | Nov 4 2013 | satmode | n |
| solvent | cd2cl2     | wet     | n |
| file    | exp        | SPECIAL |   |

|             |         |          |          |
|-------------|---------|----------|----------|
| ACQUISITION | temp    | not used |          |
| sw          | 40000.0 | gain     | 20       |
| at          | 0.200   | spin     | not used |
| np          | 16000   | hst      | 0.008    |
| fb          | 22000   | pw90     | 10.000   |
| bs          | 8       | alfa     | 0        |

|    |       |    |    |
|----|-------|----|----|
| dl | 0.200 | il | n  |
| nt | 2000  | in | n  |
| ct | 400   | dp | y  |
| tn | B11   | hs | nn |

|      |        |            |          |
|------|--------|------------|----------|
| stfq | 96.268 | PROCESSING |          |
| tof  | 2891.6 | lb         | 10.00    |
| tpwr | 58     | fn         | not used |
| pw   | 8.000  | DISPLAY    |          |

|           |       |          |         |
|-----------|-------|----------|---------|
| DECOUPLER | sp    | -19995.1 |         |
| dn        | H1    | wp       | 39995.1 |
| doe       | 0     | rfl      | 20000.0 |
| dm        | nmn   | rfp      | 0       |
| decwve    | w     | rp       | -28.3   |
| dpwr      | 36    | lp       | -28.8   |
| dmf       | 10940 | PLOT     |         |

|    |        |
|----|--------|
| wc | 250    |
| sc | 0      |
| vs | 345639 |
| th | 60     |
| ai | cdc    |
| ph |        |

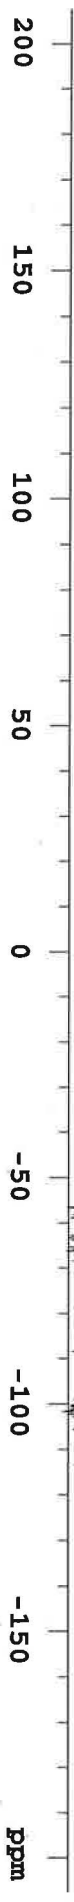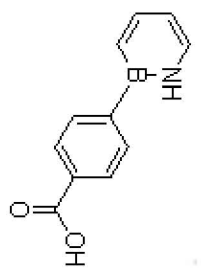

33.578

exp3 PROTON

```
SAMPLE 5 2015 PRESATURATION
date May 5 2015 satmode n
solvent cdc13 wet n
file exp SPECIAL 25.0
ACQUISITION temp 52.0
sw 6410.3 gain 52
at 2.556 spin not used
np 32768 hst 0.008
fb 4000 pw50 8.700
bs 32 alfa 10.000
d1 1.000
nt 8
ct 8
TRANSMITTER H1
tn H1 hs
stfq 399.769
tof 399.8 fn
tpwr 62 DISPLAY
pw 4.350 SP -806.1
DECOUPLER C13 WP 6409.9
dn 0 rfi 806.5
dof 0 rfp 0
dm nn TP 99.9
decwave W40_AutoX_ TP 0
DB_PFG_MR0902W042 WC PLOT 250
dpwr 39 SC 0
dmf 29412 VS 120
ai cdc ph 3
```

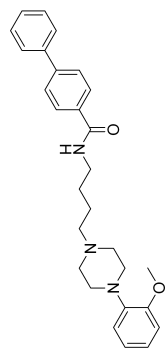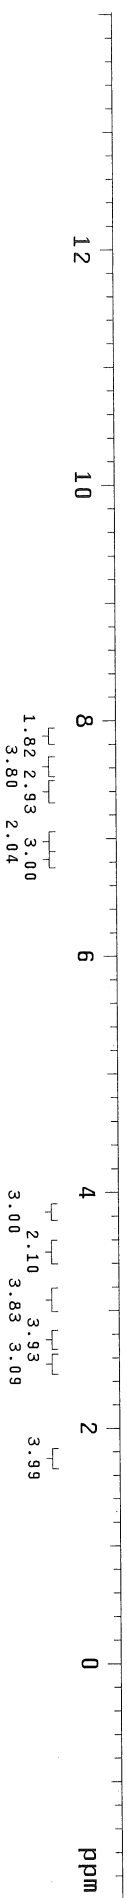

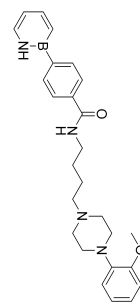

```

exp1  PROTON
SAMPLE 5 2015
date Nov 5 2015
solvent cd2cl2
file exp
PRESATURATION
satmode n
wet SPECIAL
temp 25.0
ACQUISITION
sw 6410.3 gain
at 2.556 sp1n not used
np 32768 hst 0.008
fb 4000 pw90 8.700
bs 4 alfa 10.000
d1 1.000
nt 72
ct 72
TRANSMITTER H1
tn H1
sf-rq 399.759 fn
tof 399.7 fn not used
tpwr 52 DISPLAY
pw 4.350 SP -806.2
DECOUPLER C13 WP 6409.9
dn 0 rfp 806.6
dof 0 rfp 0
dm nnn rfp -83.3
decouple V40_AutoX~
DB_PFG_MR0902W042 39
dppw WC 250
dmf 29412 VS 0
          VS 973
          tn 3
          at cdc ph
  
```

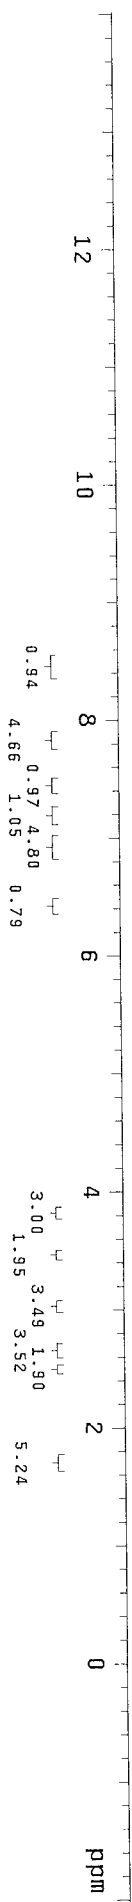

expt1 CARBON

SAMPLE PRESATURATION  
date Feb 12 2014 satmode n  
solvent cd2c12 wet n  
file ACQUISITION exp SPECIAL 25.0  
sw 31250.0 gain 30  
at 1.049 spin not used  
np 65356 hst 0.008  
fb 17000 pw90 10.000  
bs 4 alfa 10.000  
dl 1.000  
nt 2000 t1 n  
ct 332 in n  
tn TRANSMITTER C13 hs y  
stf 125.709 PROCESSING nm  
tof 1914.0 lb 0.50  
tpwr 55 fn not used  
pw 5.000 DISPLAY  
dn DECOUPLER H1 sp -1797.5  
dot 0 wd 31249.0  
dm 0 rfp 1798.5  
decwawe w rfp -116.4  
dpwr 40 tp 0  
dmf 12361 PLOT  
wc 250  
sc 0  
vs 100  
tn 4  
nm cdc ph

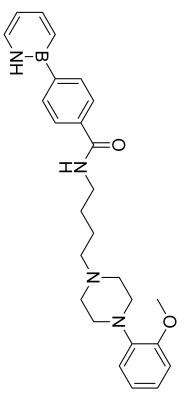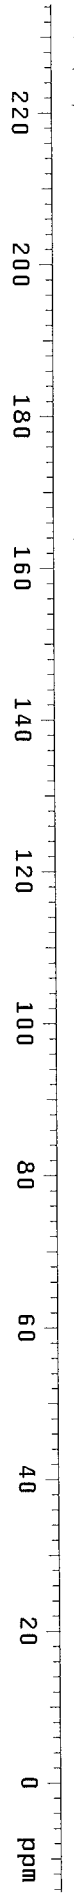

Automated Probe tuning parameter

```

exp1 s2pu1
SAMPLE
date Apr 24 2015
solvent cd2c12
file exp
PRESATURATION
satmode n
wet n
SPECIAL
temp 25.0
gain 16
at 0.100 not used
np 7812 hst 0.008
fb 17000 pw90 32.250
bs 4 altfa 10.000
dl 0.100
nt 4000
ct 212
TRANSMITTER B11
hs
dp
PROCESSING 0.50
tn 192.409 1b
sfreq 11557.8 fn
tof 60 not used
tpwr 32.250
pw 32.250
DECOUPLER
sp -13768.2
dn H1 wp 39053.0
dof 0 rfi 13777.7
dm nny ffp 0
decwawe v fp 104.6
qpwr 45 1p
PLOT
dmf 15504 WC 250
VS 0
th 72489
ai cdc ph 19
  
```

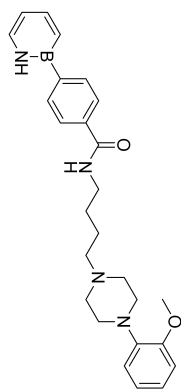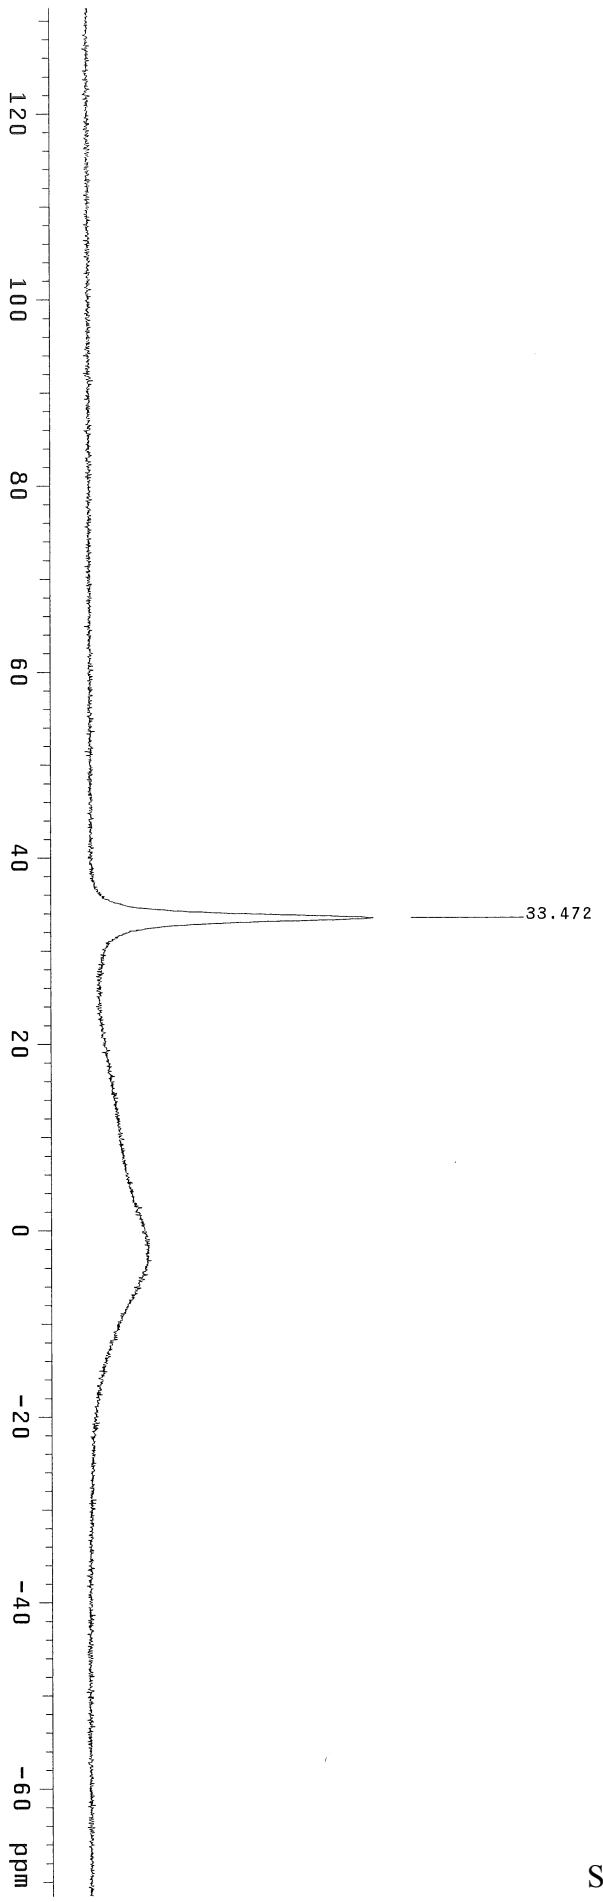

expt1 PROTON

SAMPLE Oct 10 2014 PRESATURATION n  
date Oct 10 2014 satmode n  
solvent acetone wet acetone  
file exp SPECIAL 25.0  
ACQUISITION gain not used  
sw 7996.0 at 2.049 spm 20  
np 32768 hst 0.008  
fb 4000 pw90 10.750  
bs 32 a1fa 10.000  
dl 1.000  
nt 8  
ct 8  
TRANSMITTER H1  
tn 499.778 fn hs  
sffq 499.778 fn not used  
tof 499.8 DISPLAY not used  
tpwr 63  
pw 5.375 SP -998.8  
DECOUPLER C13 WP 7995.5  
dn 0 rfi 999.3  
dof 0 rfp 0  
dm nnn 1.9  
decwave W40\_HCN5mm lp -72.4  
dpwr 42 PLOT 250  
dmf 32258 WC SC 0  
VS 0  
th 87  
ai cdc ph 2

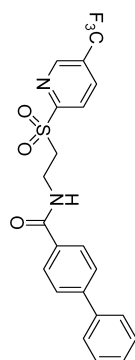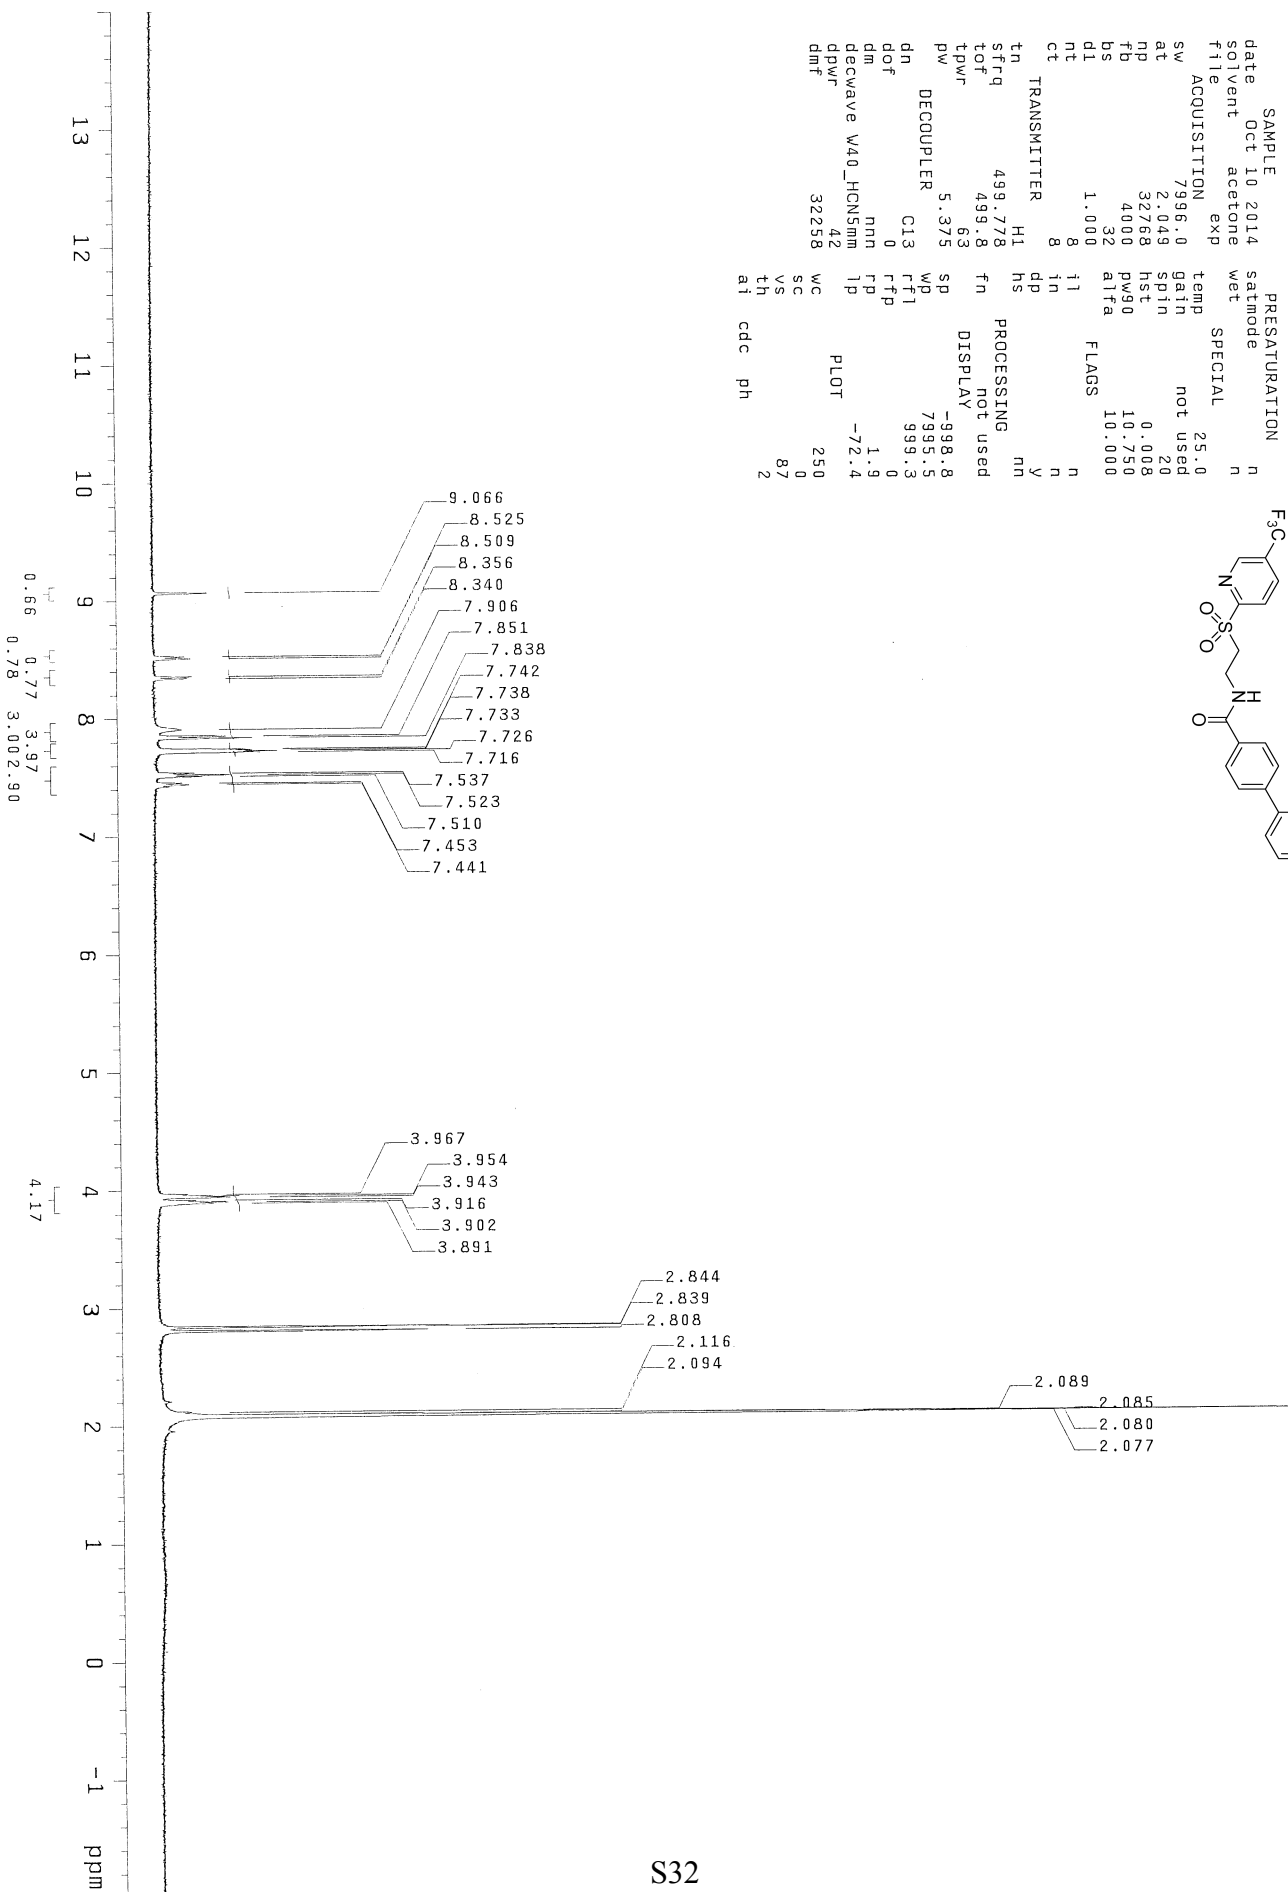



STANDARD 1H OBSERVE - profile

expt PROTON  
 SAMPLE date Oct 17 2014 PRESATURATION n  
 solvent dmsd satmode n  
 file ACQUISITION exp temp SPECIAL 25.0  
 sw 8012.8 gain 30  
 at 2.045 spin not used  
 np 32768 hst 0.008  
 fb 4000 pw90 9.125  
 bs 32 alfa 10.000  
 dl 1.000  
 nt 8  
 ct TRANSMITTER h1  
 tn 499.886  
 sfrq 499.9  
 tof 59  
 tpwr 4.562  
 pw DECOUPLER C13  
 dn 0  
 dof 0  
 dm rfp  
 decwvave W40\_HCN5mm  
 dpwr 35  
 dmf 32258  
 al th cdc ph  
 1 75 0 250  
 1 75 0 250

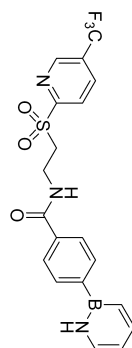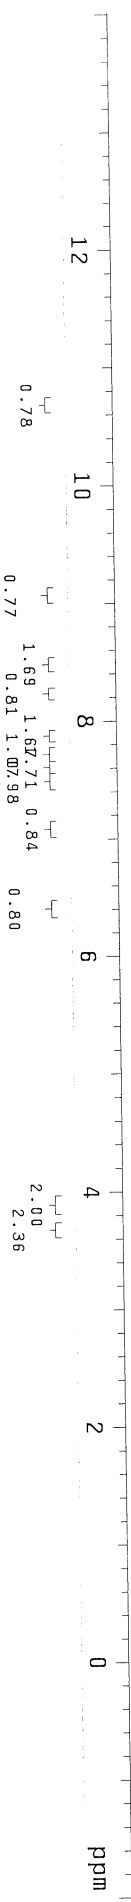

STANDARD 1H OBSERVE - profile

exp1 CARBON

|             |           |             |               |          |    |
|-------------|-----------|-------------|---------------|----------|----|
| SAMPLE      | date      | Oct 17 2014 | PRESATURATION | satmode  | n  |
| solvent     | dmsc      |             | wet           | SPECIAL  | n  |
| file        | exp       |             | temp          | 25.0     |    |
| ACQUISITION | sw        | 31250.0     | gain          | 30       |    |
|             | at        | 1.049       | spin          | not used |    |
|             | np        | 65536       | hst           | 0.008    |    |
|             | fb        | 17000       | pw90          | 10.000   |    |
|             | bs        | 4           | atfa          | 10.000   |    |
|             | d1        | 1.000       | FLAGS         |          |    |
|             | nt        | 40000       | i1            | n        |    |
|             | ct        | 168         | in            | n        |    |
| TRANSMITTER | hs        |             | dp            | y        |    |
| tn          | C13       |             | PROCESSING    | 0.50     |    |
| sfreq       | 125.710   |             | ld            | not used |    |
| tof         | 1913.9    |             | fn            |          |    |
| tpwr        | 5.000     |             | DISPLAY       | -1797.5  |    |
| pw          | DECOUPLER | H1          | sp            | 31248.0  |    |
| dn          | dof       | 0           | wp            | 1798.5   |    |
| dm          | yyy       | N           | rfp           | 0        |    |
| decwave     | N         |             | fp            | -123.3   |    |
| dpwr        | 40        |             | lp            | 0        |    |
| dmf         | 12361     |             | PLOT          |          |    |
|             | WC        | 250         | nm            | cdc      | ph |
|             | SC        | 0           |               |          |    |
|             | VS        | 100         |               |          |    |
|             | TH        | 3           |               |          |    |

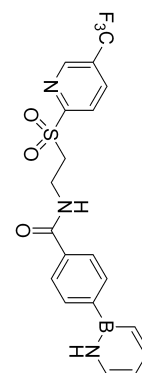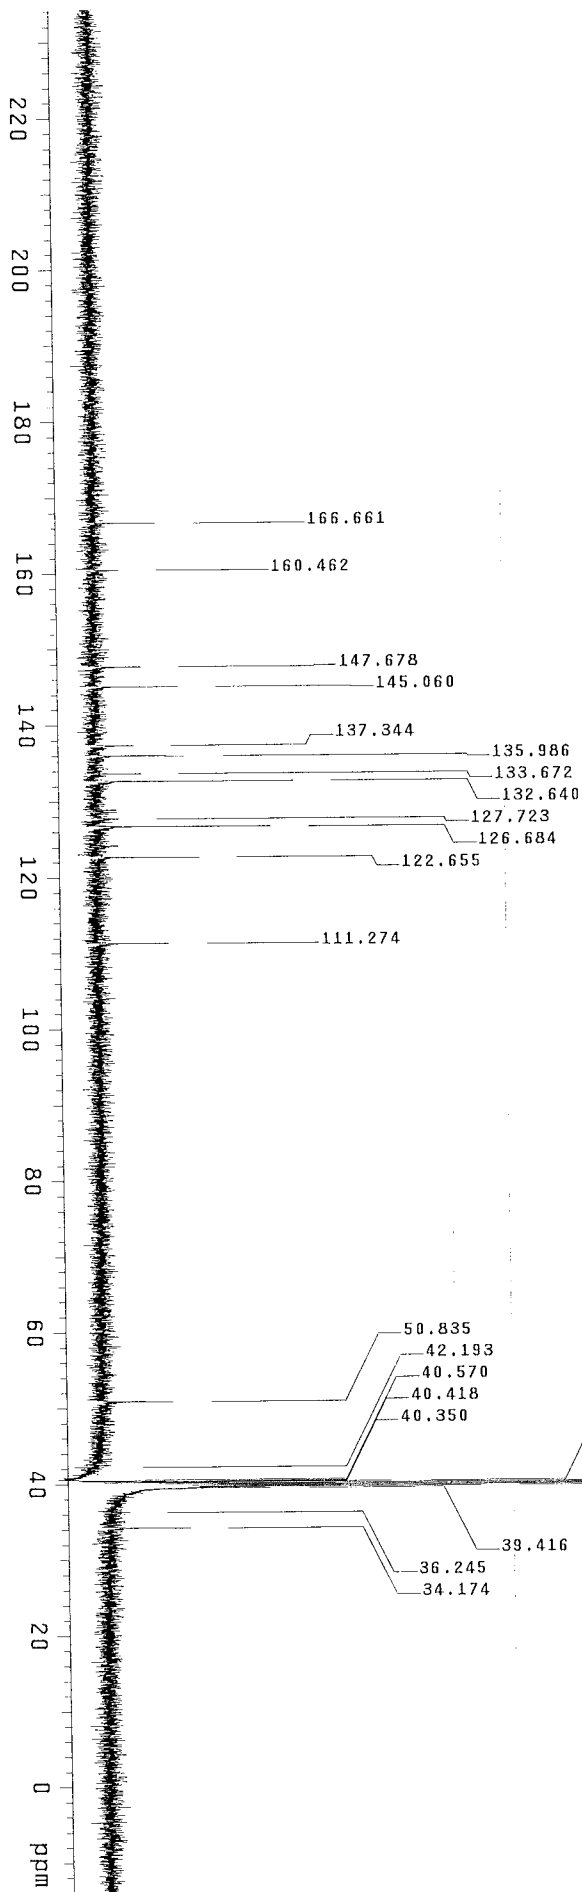

STANDARD 1H OBSERVE - profile

expt s2pu1

|             |             |             |               |          |   |
|-------------|-------------|-------------|---------------|----------|---|
| SAMPLE      | date        | Oct 17 2014 | PRESATURATION | satmode  | n |
| solvent     | dms         | dms         | temp          | 25.0     |   |
| file        | exp         | 32051.3     | gain          | 30       |   |
| ACQUISITION | exp         | 0.100       | sp1n          | not used |   |
| sw          | 6410        | hst         | pw90          | 11.900   |   |
| at          | 17000       | alfta       | 10.000        |          |   |
| np          | 4           | FLAGS       |               |          |   |
| fb          | 0.100       | f1          | n             |          |   |
| bs          | 4000        | f2          | n             |          |   |
| d1          | 312         | in          | y             |          |   |
| nt          | TRANSMITTER | dp          | mn            |          |   |
| ct          | B11         | hs          |               |          |   |
| tn          | 160.382     | 1b          | PROCESSING    | 15.00    |   |
| strq        | 4817.4      | fn          | not used      |          |   |
| tof         | 55          | sp          | DISPLAY       | -15615.5 |   |
| tpwr        | 11.750      | wp          | 32043.5       |          |   |
| pw          | DECOUPLER   | rfl         | 15623.3       |          |   |
| dn          | H1          | rfp         | 152.1         |          |   |
| dof         | 0           | tp          | 0             |          |   |
| dm          | nmv         | PL0T        | 250           |          |   |
| decwawe     | w           | WC          | 0             |          |   |
| dpwr        | 40          | SC          | 0             |          |   |
| dmf         | 12361       | VS          | 125748        |          |   |
|             |             | th          | 26            |          |   |
|             |             | at          | cdc           | ph       |   |

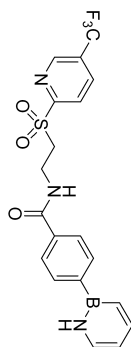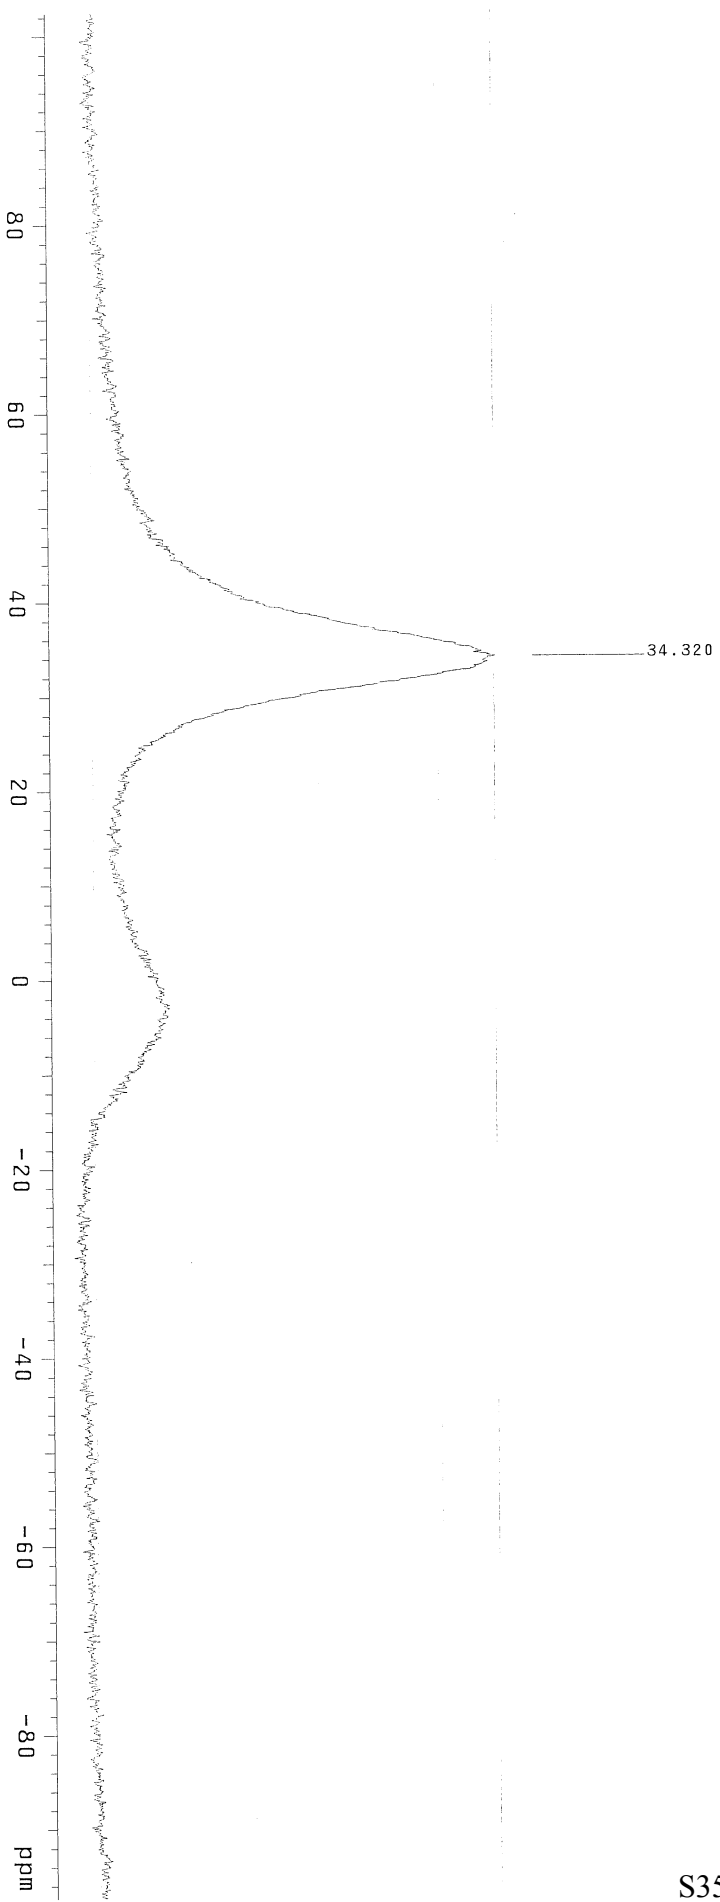

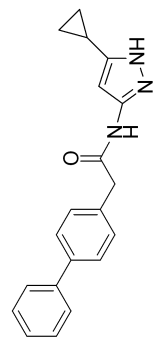

```

exp1 PROTON
SAMPLE 4 2015
date Aug 4 2015
solvent dmsd
file ACQUISITION exp
PRESATURATION n
satmode SPECIAL n
temp 25.0
gain 25.44
at 2.556
np 32768
fb 4000
bs 32
d1 1.000
nt 8
ct 8
TRANSMITTER HI
in HI
sfrq 399.771
tof 399.8
pw 4.350
DECOUPLER C13
dn 0
dof 0
dm nnn
decwave W40_AutoX_
DB_PFG_MR0902W042 39
dwd 29412
dmf 29412
PRESATURATION n
satmode SPECIAL n
temp 25.0
gain 25.44
at 2.556
np 32768
fb 4000
bs 32
d1 1.000
nt 8
ct 8
TRANSMITTER HI
in HI
sfrq 399.771
tof 399.8
pw 4.350
DECOUPLER C13
dn 0
dof 0
dm nnn
decwave W40_AutoX_
DB_PFG_MR0902W042 39
dwd 29412
dmf 29412

```

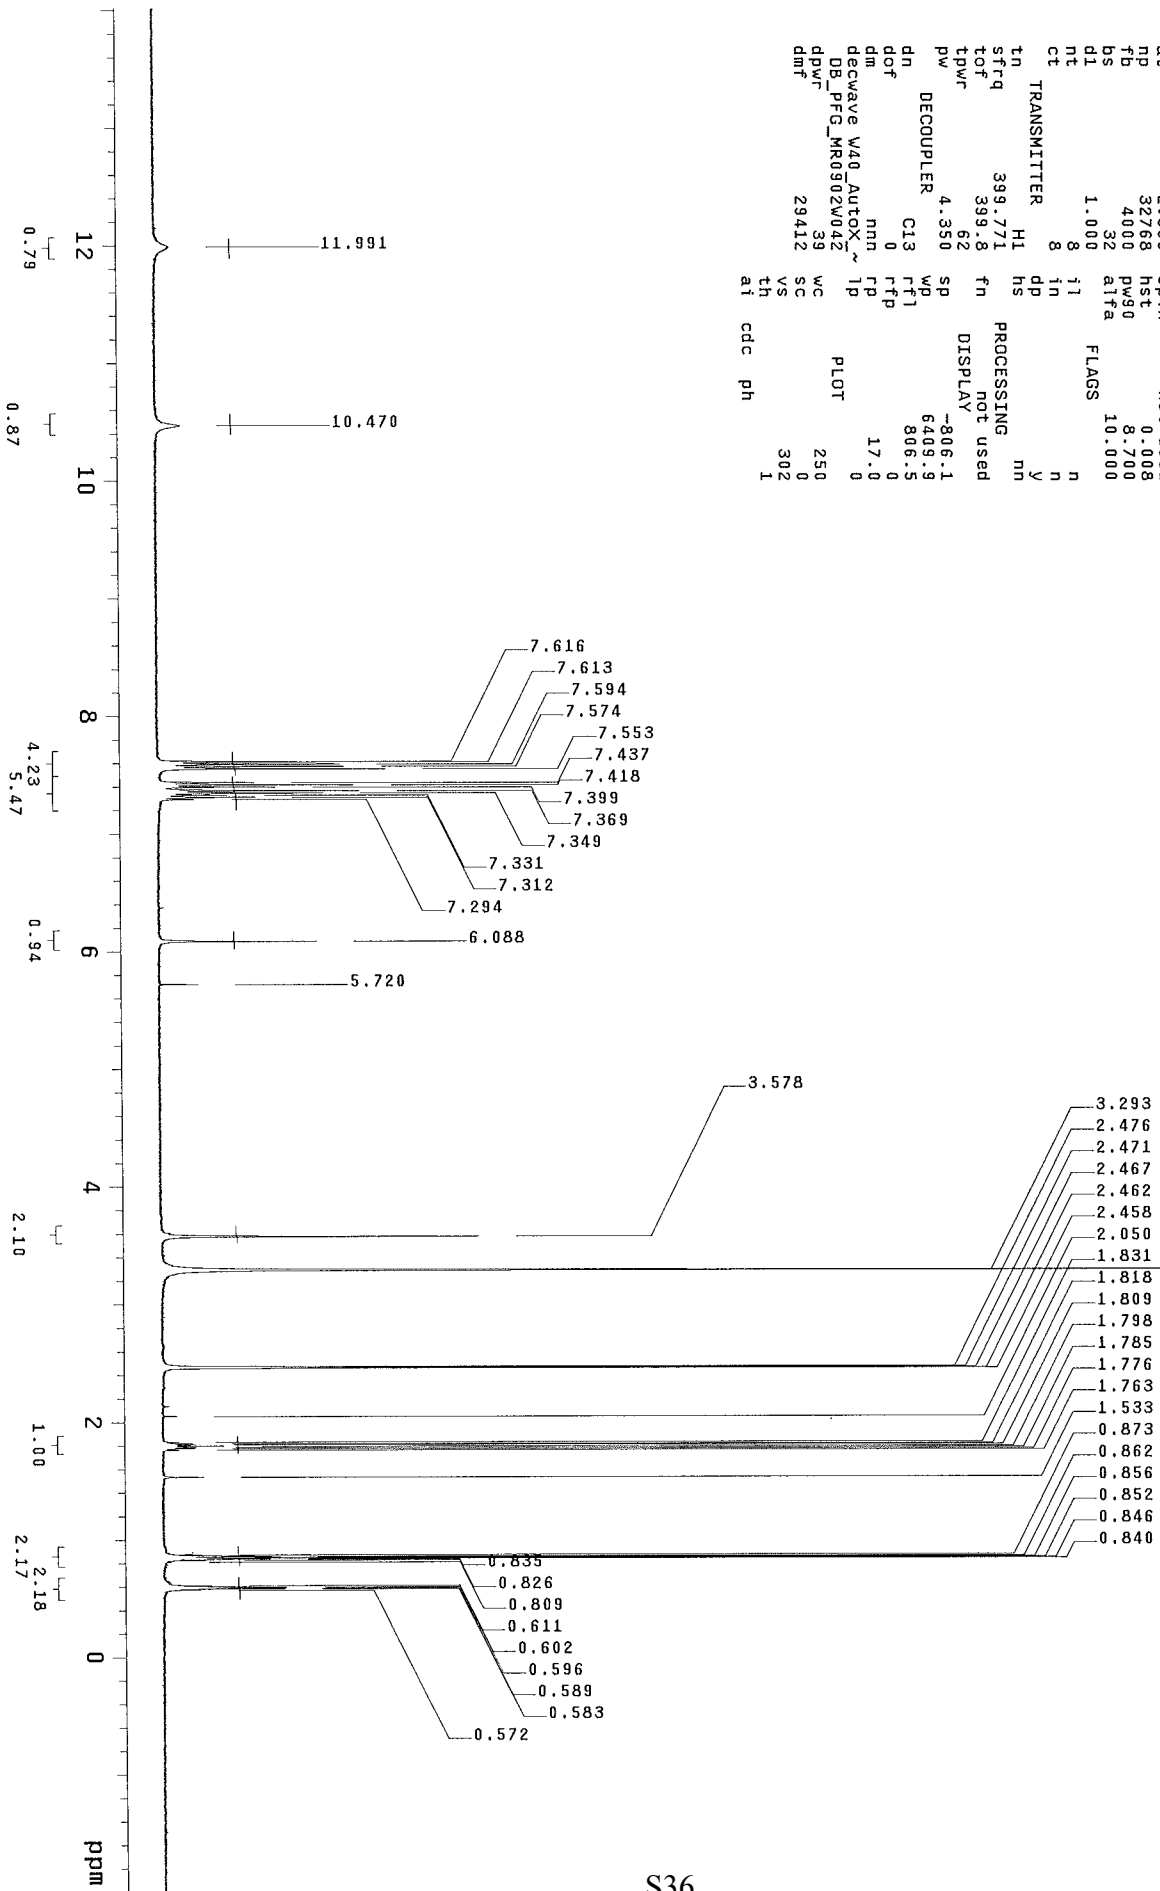

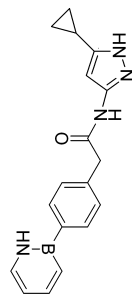

```

expt  PROTON
SAMPLE 7 2015
date Aug 7 2015
solvent dms0
file ACQUISITION exp
sw 8012.8 gain 25.0
at 2.045 spin 30
np 32768 hst not used
fb 4000 pw90 0.008
bs 32 alfa 11.675
d1 1.000 10.000
nt 8 f1 n
ct 8 f1 n
TRANSMITTER 8 dp n
tn HI hs y
strq 499.886 fn PROCESSING nm
tof 499.9 fn not used
tpwr 62 DISPLAY
pw 5.838 sp -1006.6
DECOUPLER C13 wd 8012.3
dn 0 rfl 1007.1
dof 0 rfp 0
dm nnn rp 115.7
decwave W40_Susah~ K1e1n PLOT
dplr 41 WC 250
dmf 32258 VS 0
th 312
at cdc ph 1
  
```

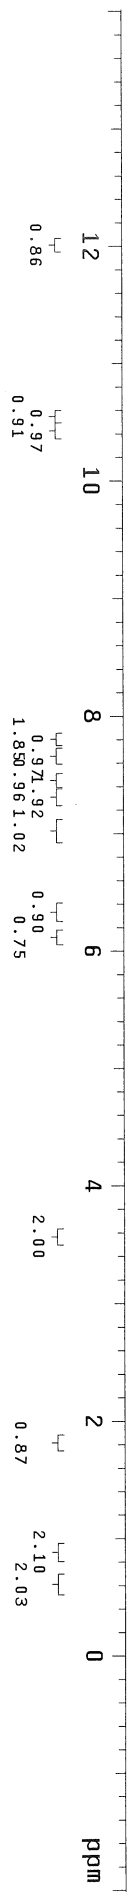

yz-2-271F-2

exp2 CARBON

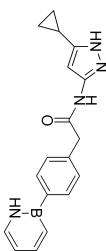

SAMPLE

PRESATURATION

date Oct 8 2016 satmode n  
solvent dmsd wet n

file exp SPECIAL

ACQUISITION temp 25.0

sw 31250.0 gain 30

at 1.049 spin 0

np 65536 hst 0.008

fb 17000 pw90 11.200

bs 4 alfa 10.000

dl 1.000 FLAGS

nt 4000 i1 n

ct 412 in n

TRANSMITTER dp y

tn C13 hs nm

sfrq 125.710 PROCESSING 0.50

tof 1913.9 lb not used

tpwr 60 fn DISPLAY

pw 5.600 sp -1797.5

DECOUPLER dn H1 wp 31249.0

dof 0 rfl 1798.5

dm YYY rfp 0

decwawe w ip 41.1

qpwr 43 lp 0

dmf 12579 PLOT

WC 234

SC 8

VS 71

lh 3

nm cdc ph

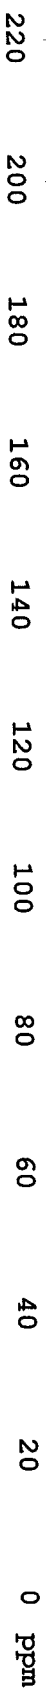

STANDARD 1H OBSERVE - profile

exp2 szpui

|             |         |             |          |    |
|-------------|---------|-------------|----------|----|
| date        | SAMPLE  | May 20 2015 | satmode  | n  |
| solvent     |         | cdcl3       | wet      | n  |
| file        |         | exp         | SPECIAL  | n  |
| ACQUISITION |         |             |          |    |
| sw          | 32051.3 | temp        | 25.0     |    |
| at          | 0.100   | gain        | 30       |    |
| np          | 6410    | spn         | not used |    |
| fb          | 17000   | hst         | 0.008    |    |
| bs          | 4       | pw90        | 11.900   |    |
| dl          | 0.100   | atfa        | 10.000   |    |
| nt          | 4000    | flags       |          |    |
| ct          | 152     | i1          | n        |    |
| tn          | B11     | in          | n        |    |
| TRANSMITTER |         |             |          |    |
| sfreq       | 160.382 | hs          | y        |    |
| tof         | 4817.4  | dp          | nn       |    |
| tpwr        | 11.750  | fn          | not used |    |
| PROCESSING  |         |             |          |    |
| DISPLAY     |         |             |          |    |
| pw          | 11.750  | sp          | -16017.8 |    |
| DECOUPLER   |         |             |          |    |
| dn          | H1      | wp          | 32043.5  |    |
| dof         | 0       | rfl         | 16025.6  |    |
| dm          | ny      | rffp        | 0        |    |
| decwave     | w       | rp          | 94.0     |    |
| dpwr        | 40      | lp          | 0        |    |
| dmf         | 12361   | PLOT        |          |    |
|             |         | wc          | 250      |    |
|             |         | sc          | 0        |    |
|             |         | vs          | 138848   |    |
|             |         | th          | 28       |    |
|             |         | ai          | cdc      | ph |

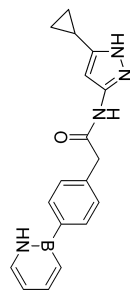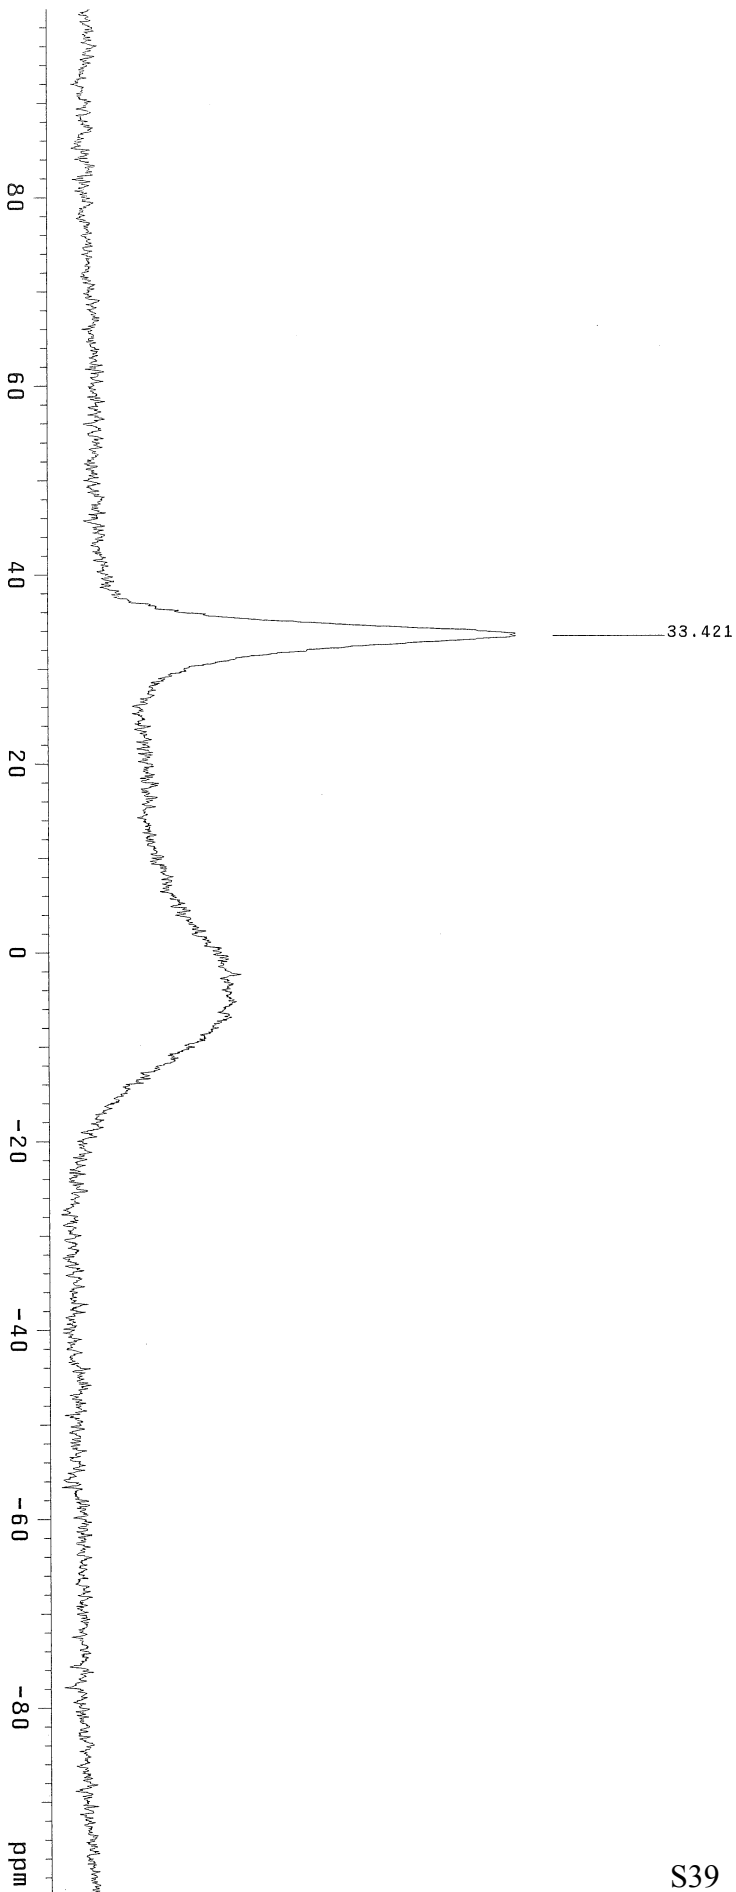

peng-34-2 stability time 0

expt1 PROTON

|                     |                |                     |               |          |
|---------------------|----------------|---------------------|---------------|----------|
| date                | May 14 2015    | SAMPLE              | PRESATURATION | n        |
| solvent             | cdcl3          | date                | satmode       | n        |
| file                | /home/liu/vnm~ | solvent             | wet           | n        |
| rSYS/data/peng/V/5~ | -459-8.f1d     | rsys/data/peng/V/5~ | temp          | 25.0     |
|                     |                |                     | gain          | 30       |
|                     |                |                     | spin          | not used |
|                     |                |                     | hst           | 0.008    |
|                     |                |                     | pw90          | 10.600   |
|                     |                |                     | alpha         | 10.000   |
|                     |                |                     | flags         | n        |
|                     |                |                     | t1            | n        |
|                     |                |                     | in            | n        |
|                     |                |                     | dd            | y        |
|                     |                |                     | hs            | nm       |
|                     |                |                     | ct            | 8        |
|                     |                |                     | tn            | HI       |
|                     |                |                     | fn            | not used |
|                     |                |                     | DISPLAY       | -998.9   |
|                     |                |                     | SP            | 7995.5   |
|                     |                |                     | WD            | 999.4    |
|                     |                |                     | RF1           | 0        |
|                     |                |                     | FFP           | -78.7    |
|                     |                |                     | TP            | -99.4    |
|                     |                |                     | IP            |          |
|                     |                |                     | PLOT          | 250      |
|                     |                |                     | WC            | 0        |
|                     |                |                     | SC            | 136      |
|                     |                |                     | VS            | 50       |
|                     |                |                     | th            |          |
|                     |                |                     | at            | cdc ph   |

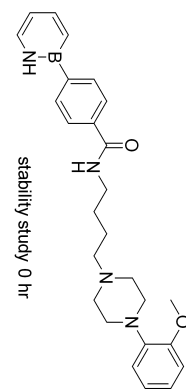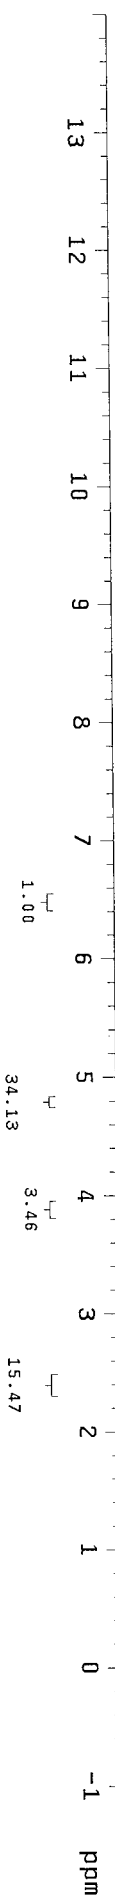



peng-34-2 stability time 24hr

exp1 PROTON

|             |             |         |               |          |
|-------------|-------------|---------|---------------|----------|
| date        | May 15 2015 | SAMPLE  | PRESATURATION | n        |
| solvent     | cdcl3       | date    | satmode       | n        |
| file        | exp         | solvent | wet           | n        |
| ACQUISITION | exp         | temp    | SPECIAL       |          |
| sw          | 8012.8      | gain    | 25.0          |          |
| at          | 2.045       | spin    | 30            |          |
| np          | 32768       | hst     | not used      |          |
| fb          | 4000        | pw90    | 0.008         |          |
| bs          | 32          | alfa    | 9.125         |          |
| di          | 1.000       | alpha   | 10.000        |          |
| nt          | 8           | tl      | 11            | n        |
| ct          | 8           | in      | in            | n        |
| TRANSMITTER | H1          | dp      | dp            | y        |
| tn          | 499.884     | hs      | hs            | nm       |
| stfq        | 499.884     | fn      | fn            | not used |
| tpwr        | 59          | sp      | sp            | -1006.7  |
| pw          | 4.562       | wd      | wd            | 8012.3   |
| DECOUPLER   | C13         | fft1    | fft1          | 1007.2   |
| dn          | 0           | rfp     | rfp           | 0        |
| dof         | 0           | tp      | tp            | 133.5    |
| dm          | nmn         | WC      | WC            | 250      |
| decwave     | w40_HCN5mm  | SC      | SC            | 0        |
| dpwr        | 35          | VS      | VS            | 412      |
| dmf         | 32258       | th      | th            | 412      |
|             |             | ai      | ai            | 7        |

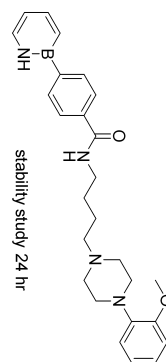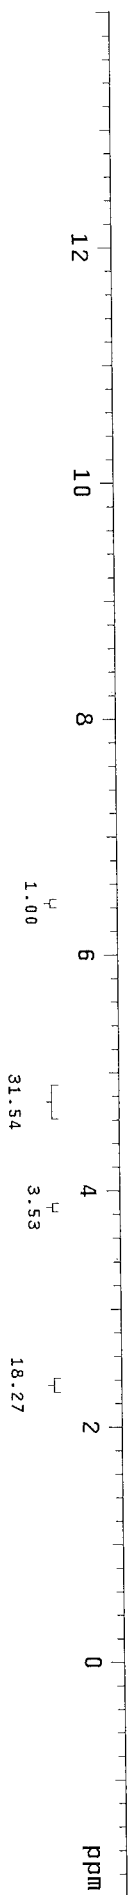

peng-34-2 stability time 0

expt s2pu1

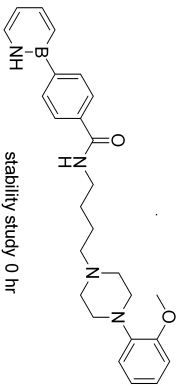

SAMPLE PRESATURATION  
 date May 14 2015 satmode n  
 solvent cdcl3 wet n  
 file exp SPECIAL  
 ACQUISITION exp temp 25.0  
 sw 32051.3 gain not used  
 at 0.100 spin 0.008  
 np 6410 hst 11.900  
 fb 17000 pw90 10.000  
 bs 4 alpha  
 dl 0.100 11  
 nt 4000 11  
 ct 276 276  
 TRANSMITTER B11  
 tn B11  
 sfreq 160.382 lb PROCESSING nm  
 tof 4817.4 fn 15.00  
 tpwr 55 not used  
 pw 11.750 DISPLAY  
 DECOUPLER SP -16190.2  
 dn H1 WP 32043.5  
 dof 0 rfl 16198.0  
 dm nny rfp 0  
 decwave w rfp -149.0  
 dpwr 40 1p PLOT  
 dmf 12361 WC 250  
 SC 0  
 VS 211484  
 th 29  
 ai cdc ph

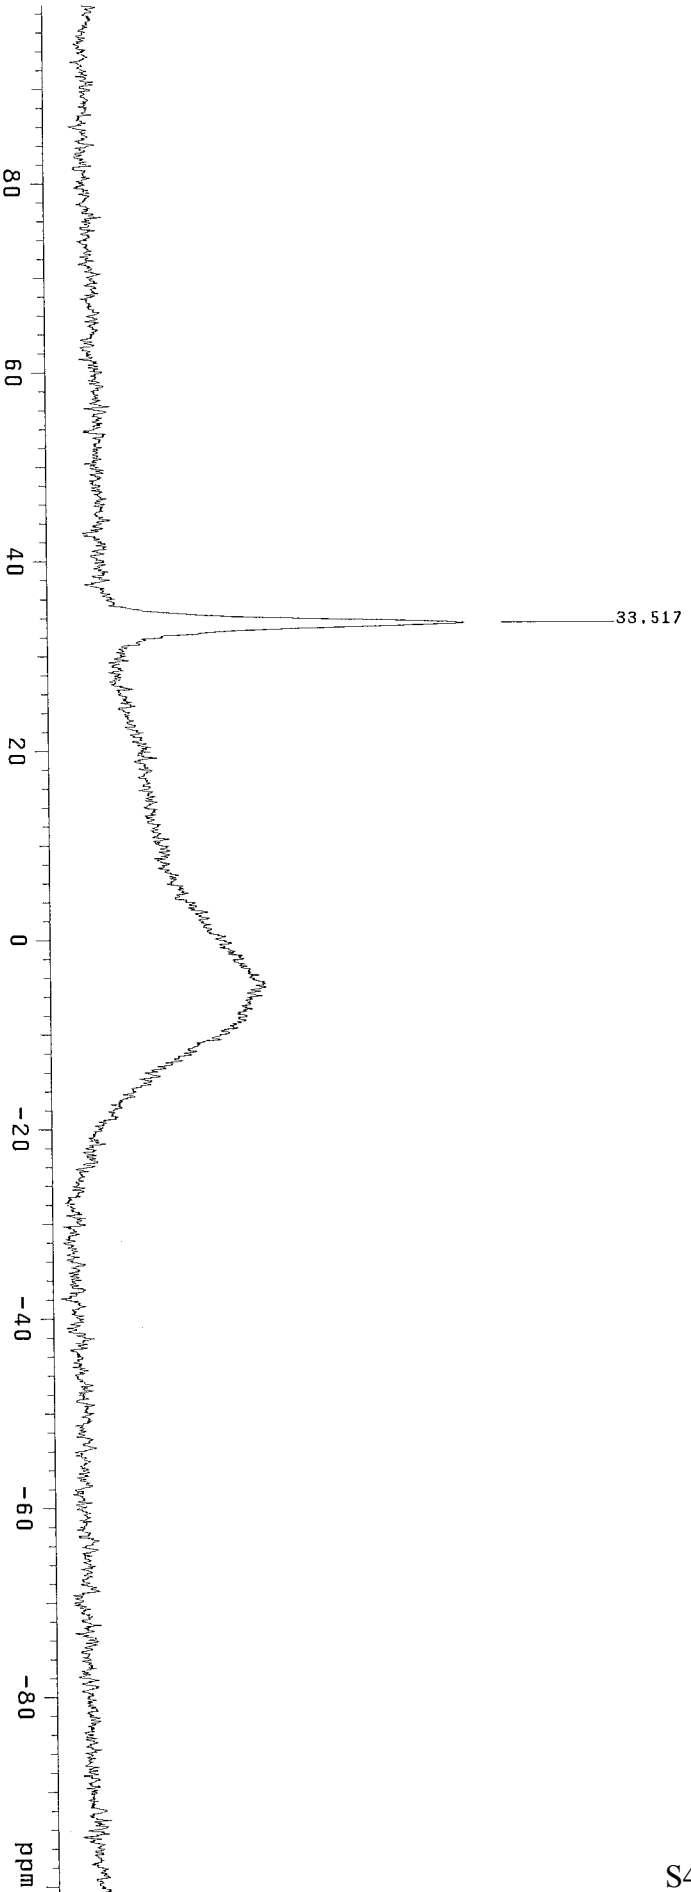

peng-34-2 stability time 24hr

expl szpu1

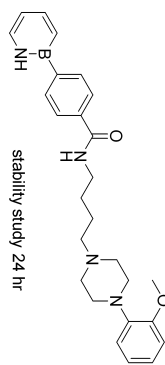

SAMPLE May 15 2015 PRESATURATION n  
solvent cdcl3 cdc13 satmode n  
file exp SPECIAL n  
ACQUISITION exp temp 25.0  
sw 32051.3 gain 30  
at 0.100 spin not used  
np 6410 hst 0.008  
fb 17000 pw90 11.900  
bs 4 alpha 10.000  
di 0.100 flags  
nt 4000 i1 n  
ct 288 in n  
dp hs y  
tn B11 PROCESSING nm  
strq 160.382 lb 15.00  
tof 4817.4 fn not used  
tpwr 55 DISPLAY  
pw 11.750 SP -16210.0  
DECOUPLER H1 WP 32043.5  
dn 0 rfi 16217.8  
dof 0 rfp 0  
dm any w -131.1  
decwave w tp 0  
dpwr 40 PLOT  
dmf 12361 WC 250  
VS 0  
th 299079  
at cdc ph 40

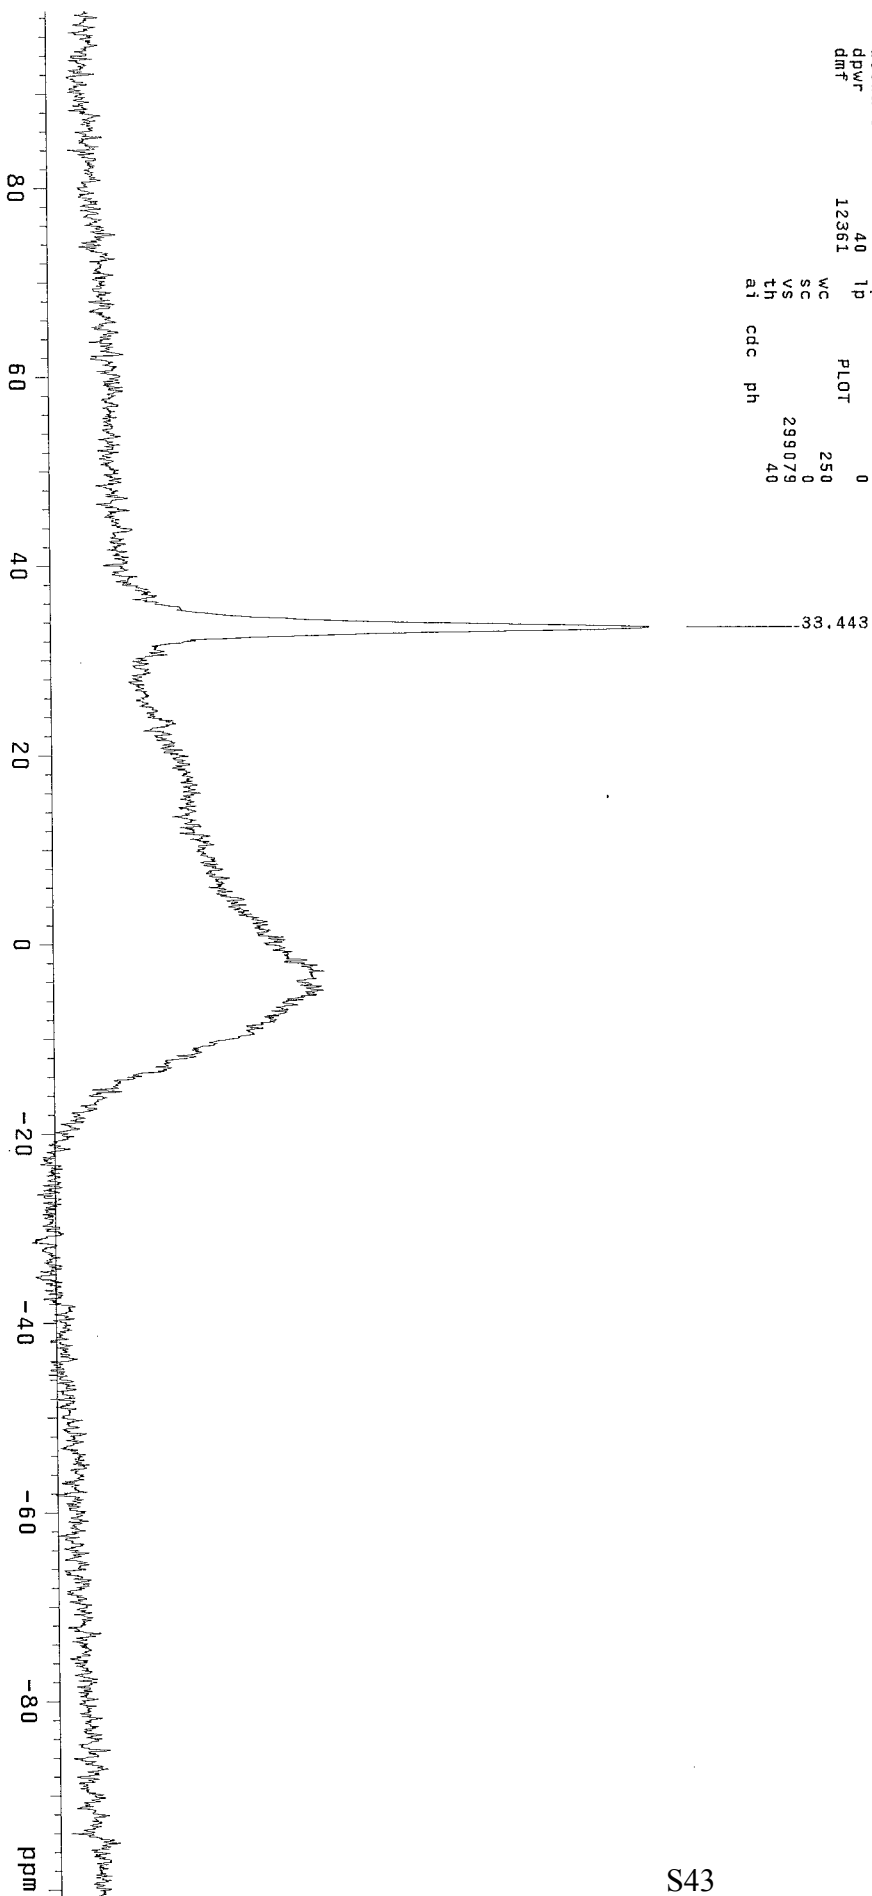

peng-91-2 stability time0

exp3 PROTON

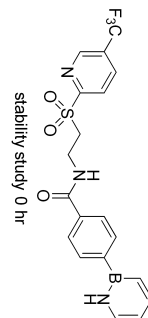

|                   |             |               |          |
|-------------------|-------------|---------------|----------|
| date              | May 11 2015 | PRESATURATION | n        |
| solvent           | dms0        | satmode       | n        |
| file              | exp         | wet           | n        |
| ACQUISITION       | 9           | SPECIAL       | n        |
| sw                | 6410.3      | temp          | 25.0     |
| at                | 2.556       | gain          | 50       |
| np                | 32768       | spn           | not used |
| fb                | 4000        | hst           | 0.008    |
| bs                | 32          | pw90          | 8.700    |
| d1                | 1.000       | alpha         | 10.000   |
| nt                | 8           | flags         | n        |
| ct                | 8           | i1            | n        |
| tn                | H1          | in            | n        |
| sfreq             | 399.771     | dp            | y        |
| tof               | 399.8       | hs            | nn       |
| tpwr              | 62          | fn            | not used |
| pw                | 4.350       | DISPLAY       | -806.1   |
| DECOUPLER         | C13         | sp            | 6409.9   |
| dn                | 0           | wp            | 806.5    |
| dof               | 0           | rfl           | 0        |
| dm                | nnn         | fp            | -160.1   |
| decwave           | M40_AutoX_  | tp            | 0        |
| DB_PFG_MR0902W042 | 39          | PLOT          | 250      |
| dpwr              | 29412       | wc            | 0        |
| dmf               |             | sc            | 204      |
|                   |             | vs            | 2        |
|                   |             | th            |          |
|                   |             | ai            |          |
|                   |             | cdc           |          |
|                   |             | ph            |          |

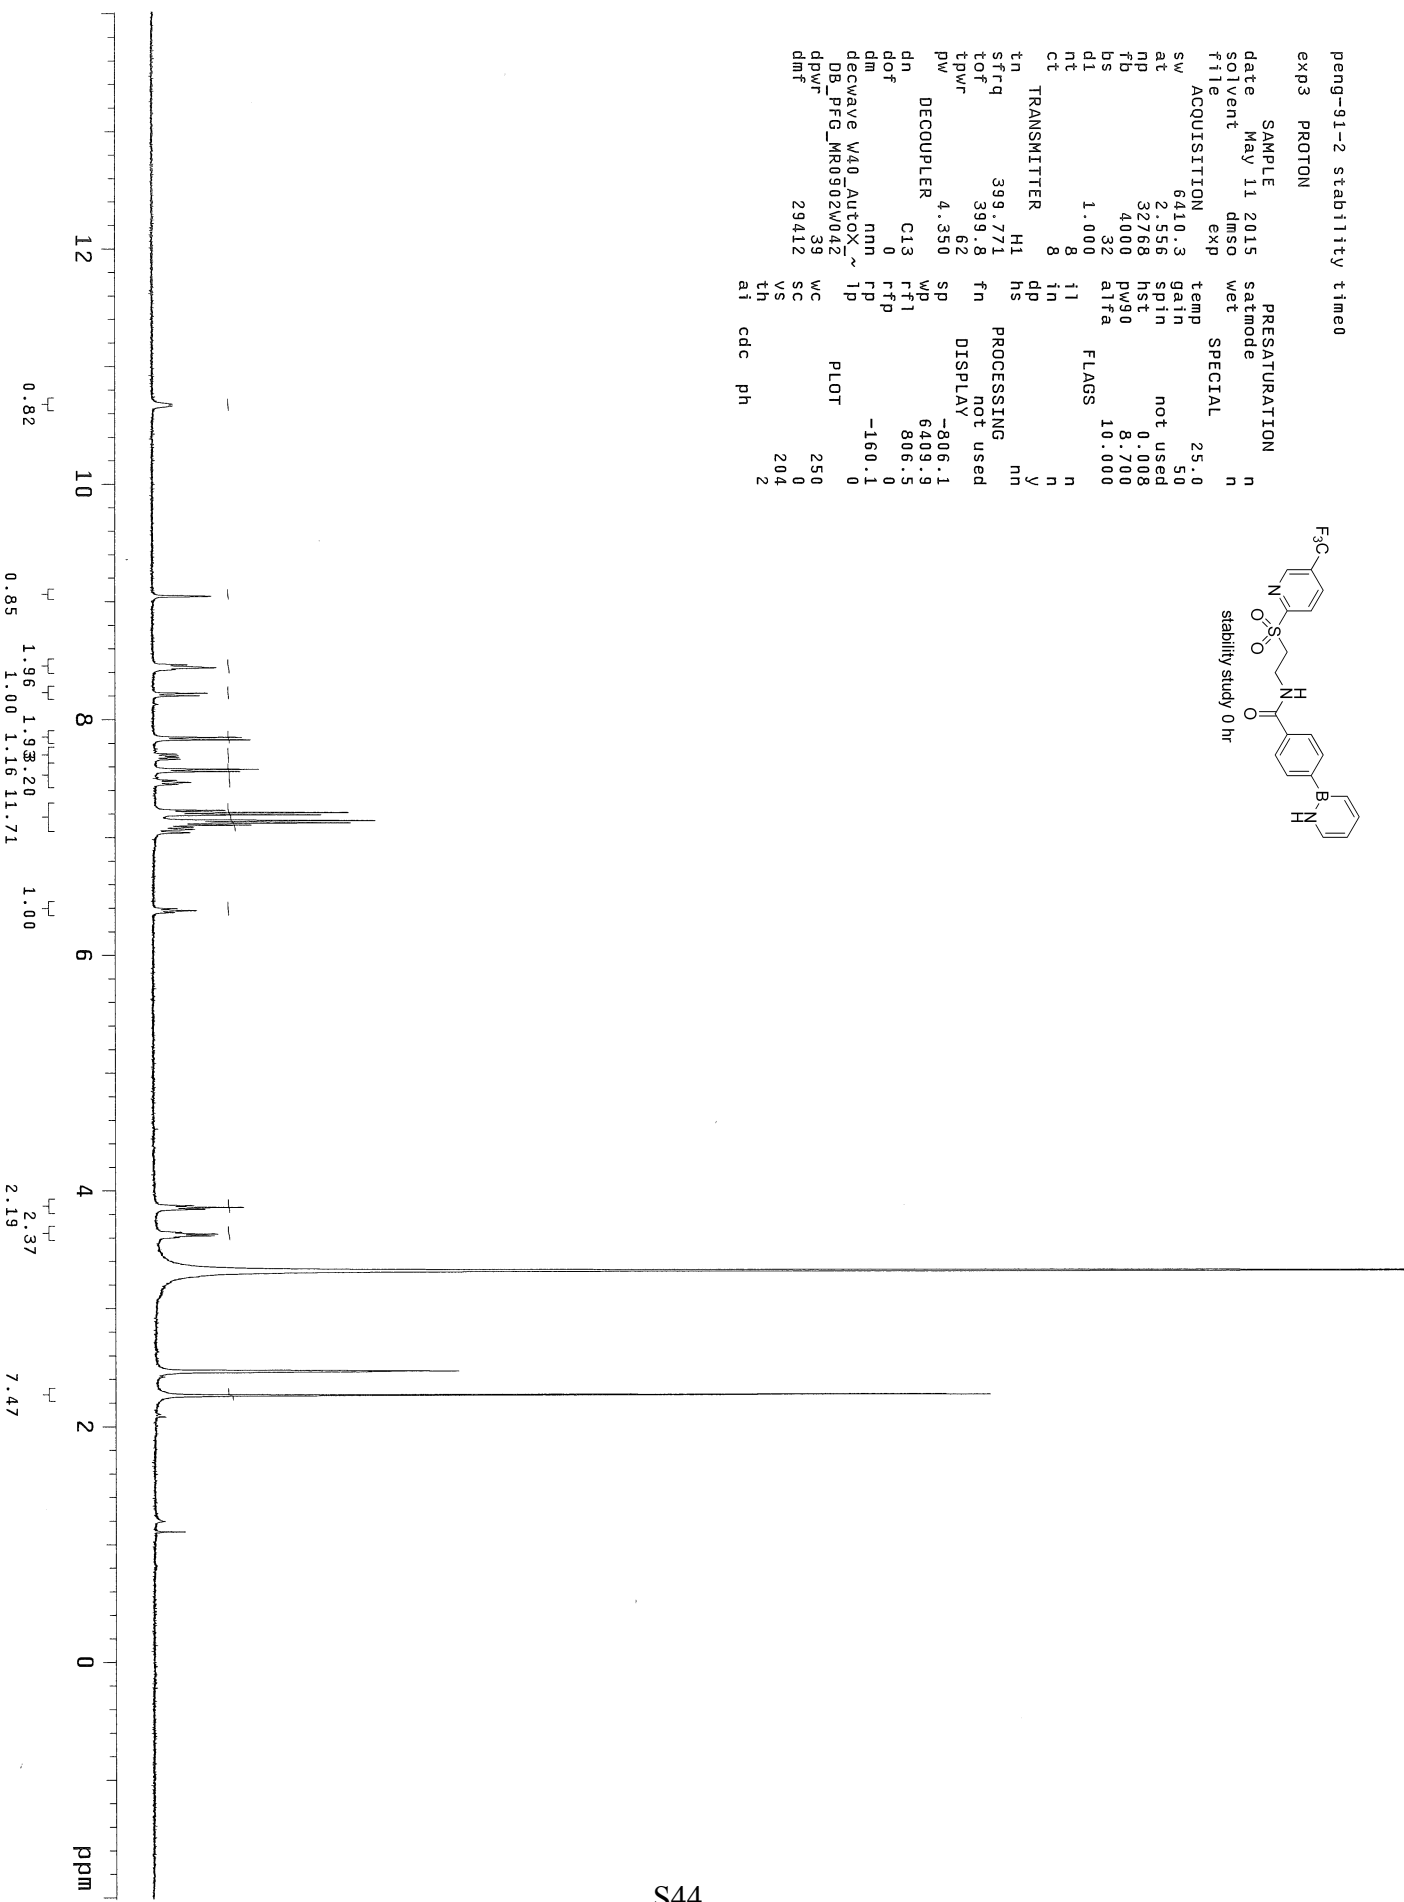

peng-91-2 stability time24hr

exp2 PROTON

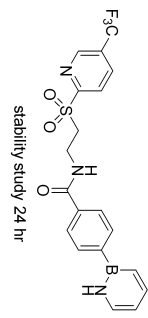

SAMPLE PRESATURATION  
 date May 12 2015 satmode n  
 solvent dms0 wet n  
 file exp SPECIAL 25.0  
 ACQUISITION temp 50  
 sw 6410.3 gain 50  
 at 2.556 sptn not used  
 nb 32768 hst 0.008  
 fd 4000 pw90 8.700  
 bs 32 atfa 10.000  
 dl 1.000  
 nt 8  
 ct 8  
 TRANSMITTER H1 hs  
 tn H1 dp  
 sfreq 399.771 fn PROCESSING  
 tof 399.8 not used  
 tpwr 62 DISPLAY  
 pw 4.350 SP -806.1  
 DECOUPLER C13 WP 6409.9  
 dn 0 rfi 806.5  
 dof 0 rfp 0  
 dm nnn fp -161.7  
 decwave W40\_AutoX\_~ PLOT 0  
 DB\_PFG\_MR0302W042 WC 250  
 dpwr 39 SC 0  
 dmf 29412 VS 171  
 ai cdc ph 2

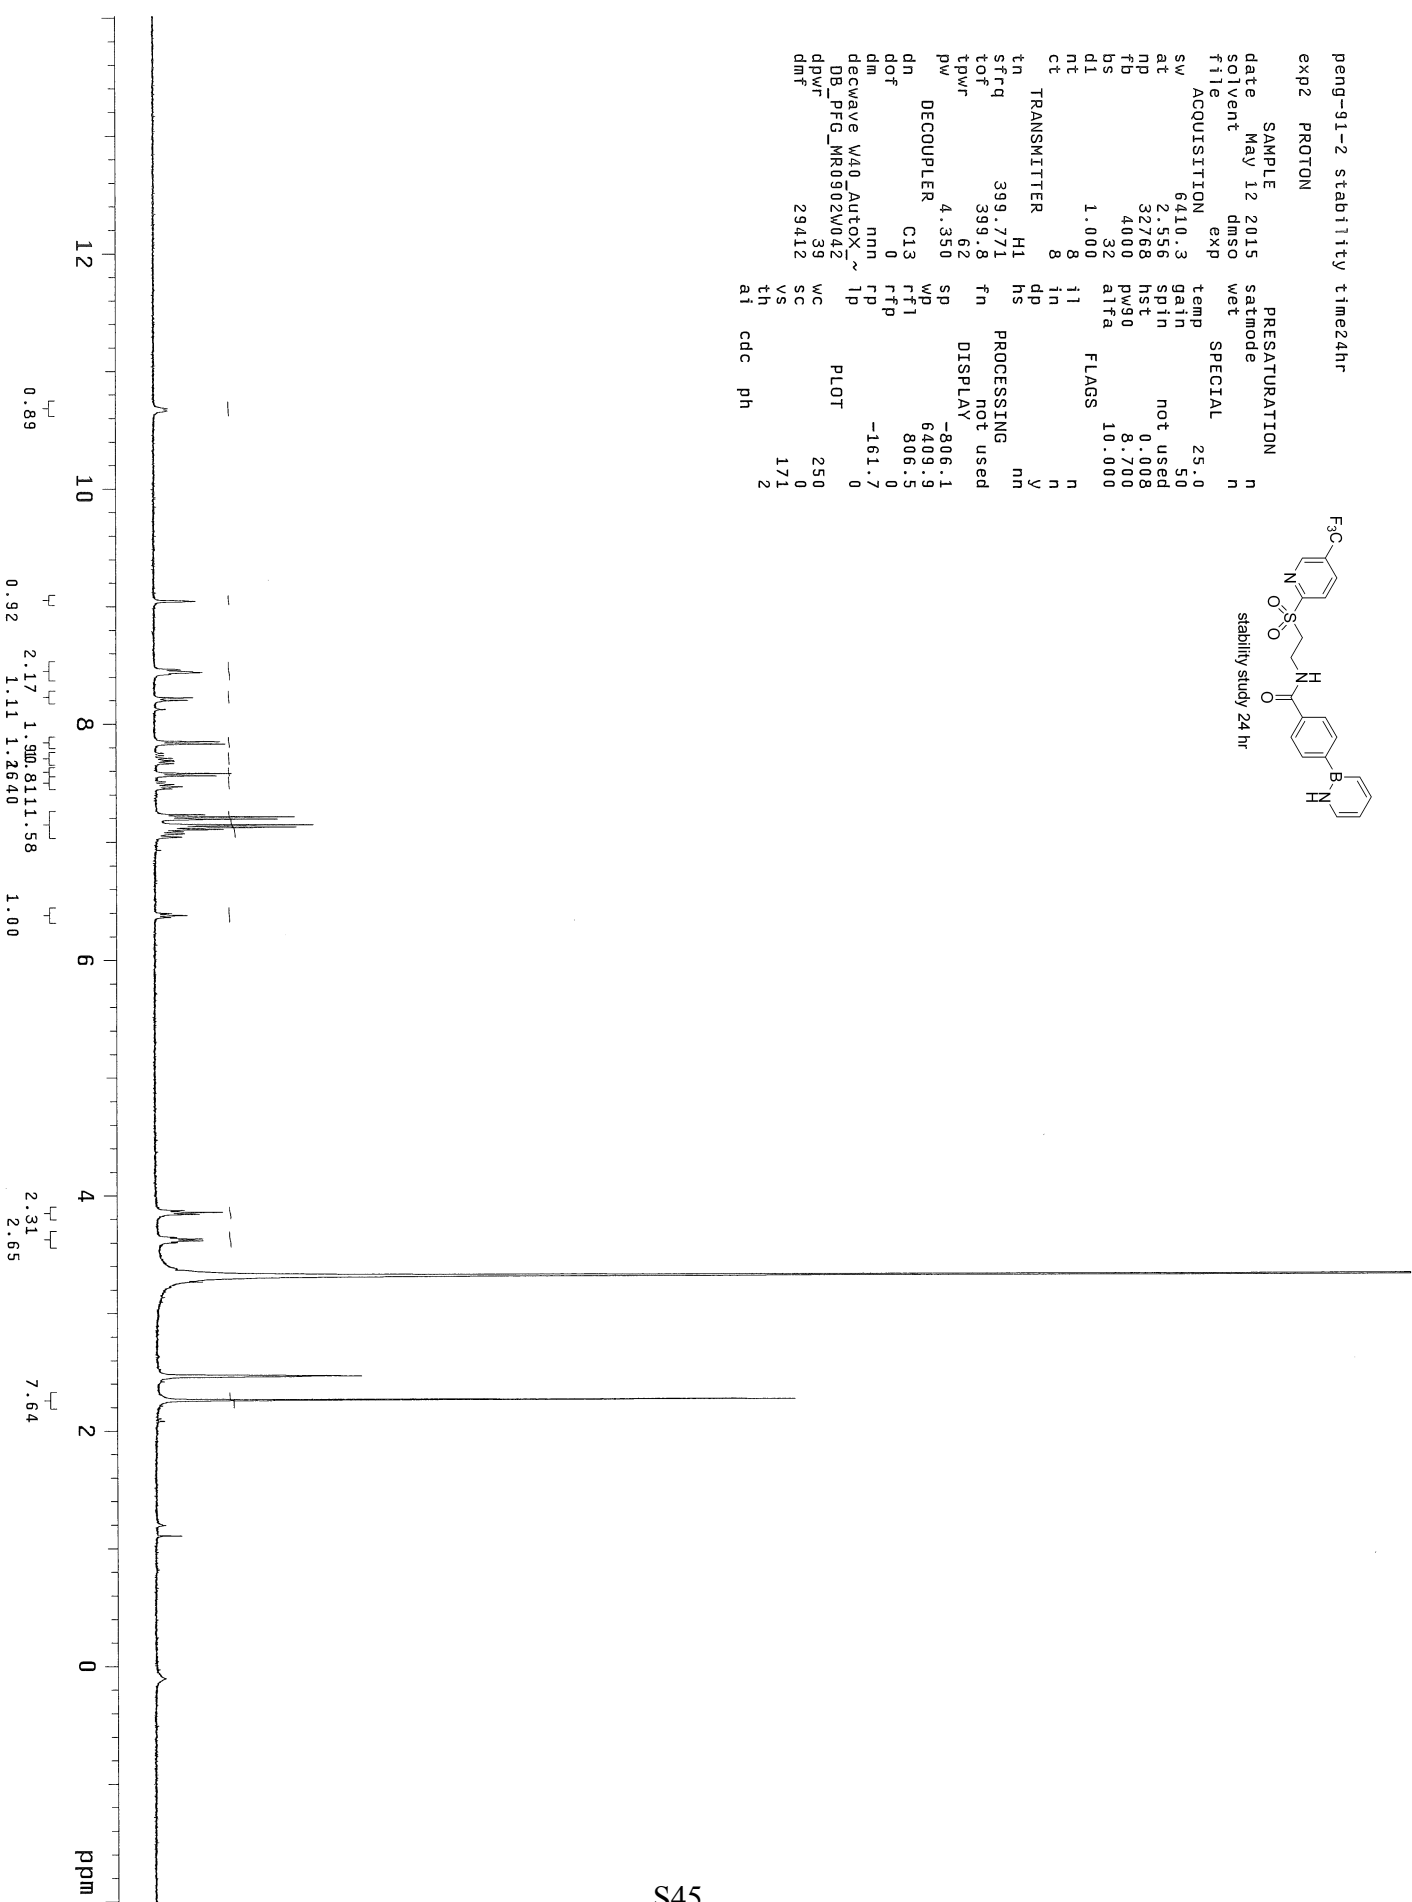

peng-91-2 stability time0

exp2 s2pu1

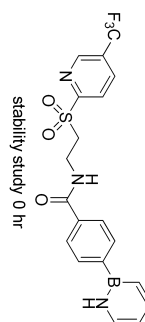

SAMPLE PRESATURATION  
 date May 11 2015 satmode n  
 solvent dms0 wet n  
 title exp SPECIAL 25.0  
 ACQUISITION temp 30  
 sw 32051.3 gain 30  
 at 0.100 sp1n not used  
 mp 6410 hst 0.008  
 fb 17000 pw90 11.900  
 bs 0.100 atfa 10.000  
 dl 4000 i1 n  
 nt 4000 in n  
 ct 164 dp y  
 TRANSMITTER B11 hs nm  
 tn 160.382 1b 15.00  
 sffq 4817.4 fn not used  
 tof 55  
 tpwr 11.750  
 pw 11.750  
 DECOUPLER sp -15775.9  
 dn H1 WP 32043.5  
 dof 0 rfl 15783.7  
 dm nny rfp 0  
 decwawe w fp -149.4  
 dpwr 40 lp 0  
 dmt 12361 PLOT  
 WC 250  
 SC 0  
 VS 105741  
 th 17  
 ai cdc ph

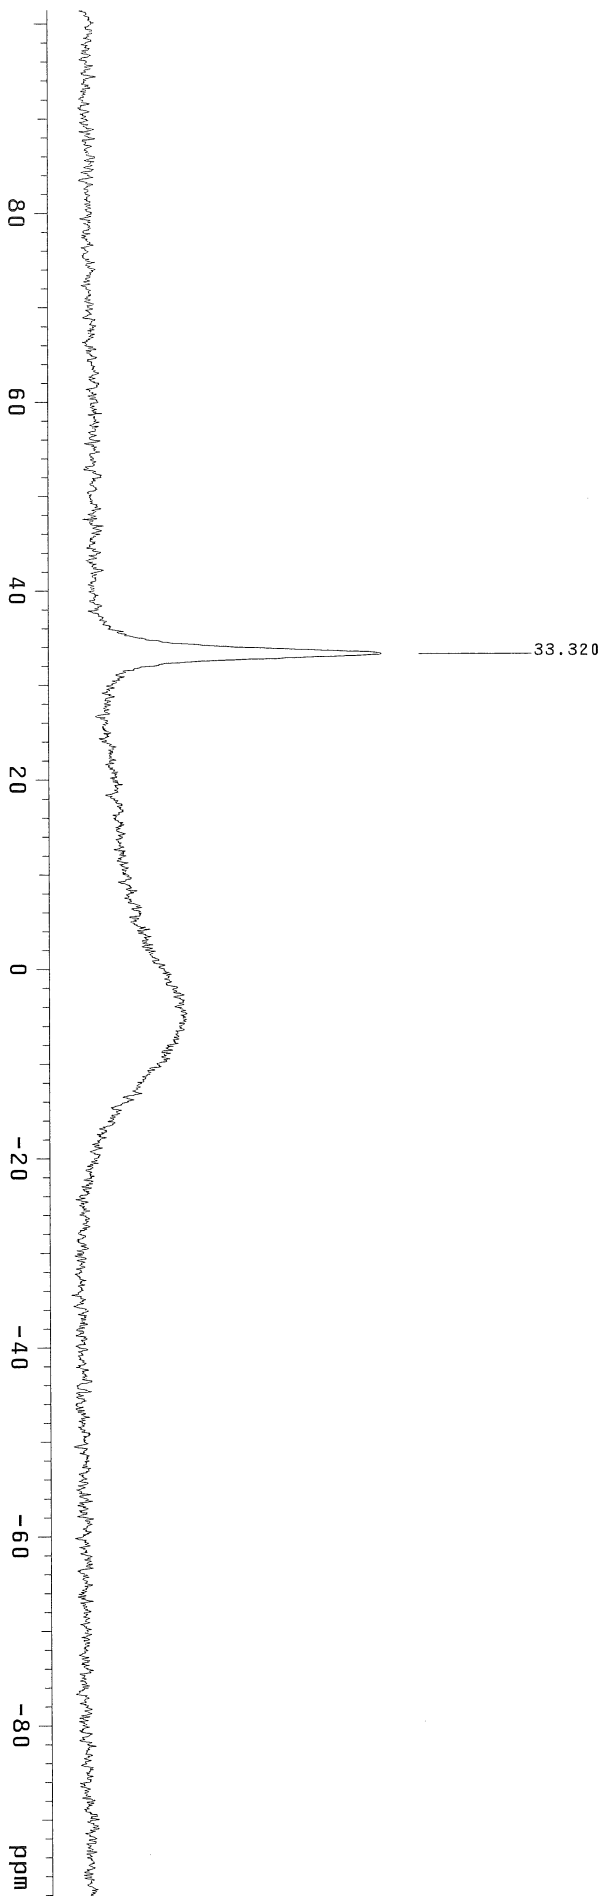

peng-91-2 stability time24hr

expt s2pu1

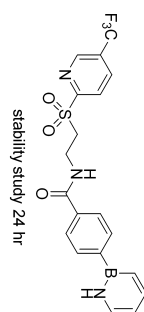

SAMPLE PRESATURATION  
date May 12 2015 satmode n  
solvent dmso wet n  
file exp SPECIAL 25.0  
ACQUISITION temp 30  
sw 32051.3 gain 30  
at 0.100 sp1n not used  
np 6410 hst 0.008  
fb 17000 pw90 11.900  
bs 4 attfa 10.000  
d1 0.100 FLAGS  
nt 4000 i1 n  
ct 284 in n  
TRANSMITTER B11 hs y  
dp dp  
PROCESSING  
tn 811 hs mn  
sfreq 160.382 lb 15.00  
tof 4817.4 fn not used  
tpwr 55  
pw 11.750 DISPLAY  
DECOUPLER SP -15754.2  
dn H1 WP 32043.5  
dof 0 rfl 15762.0  
dm nny rfp 0  
decwave w -136.2  
dpwr 40 TP 0  
dmf 12361 PLOT  
WC 250  
SC 0  
VS 105741  
th 22  
ai cdc ph

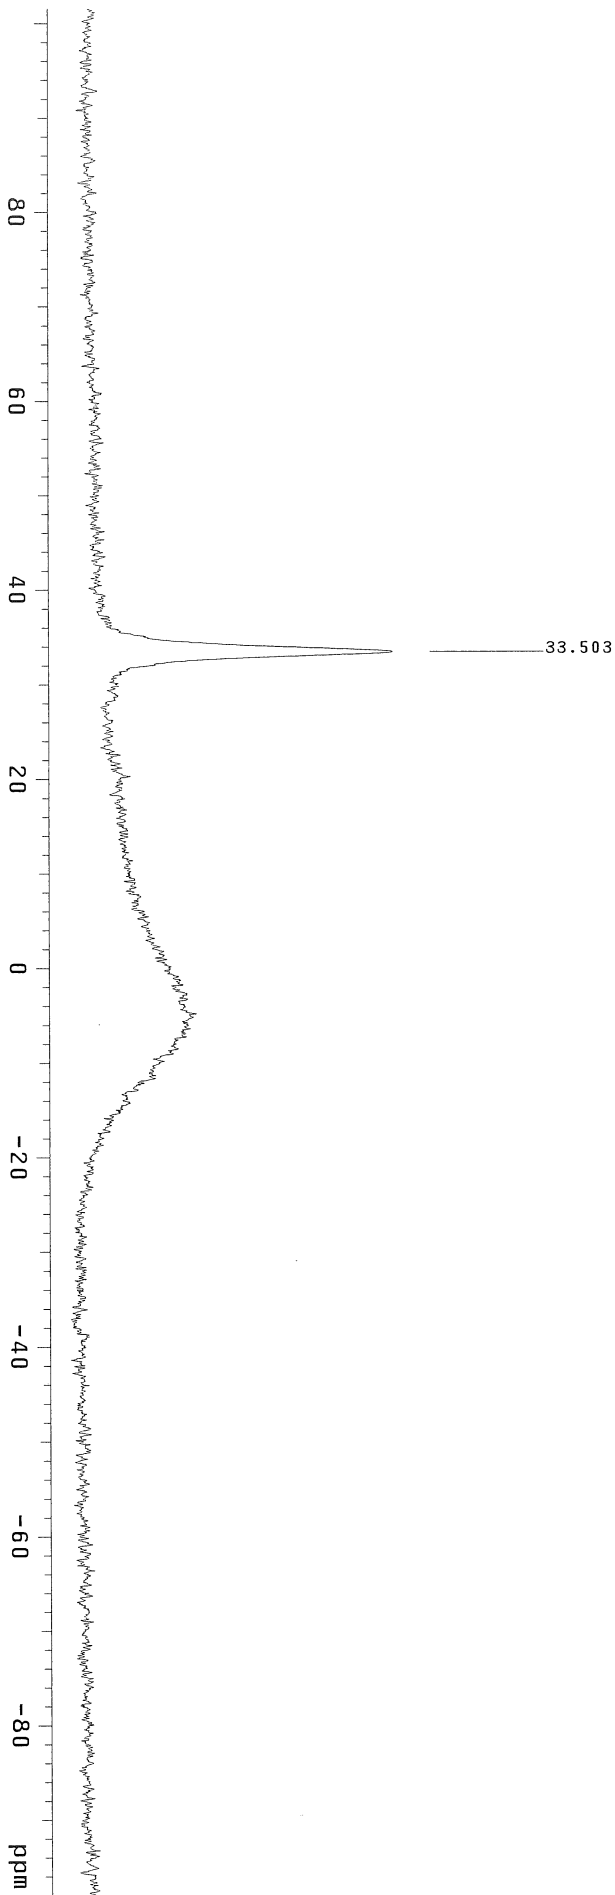

peng-103 stability time 0

exp2 PROTON

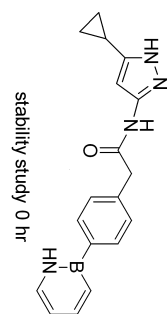

|                   |             |             |               |         |   |
|-------------------|-------------|-------------|---------------|---------|---|
| SAMPLE            | date        | May 20 2015 | PRESATURATION | satmode | n |
| SOLVENT           | dms         | dms         | wet           | wt      | n |
| FILE              | exp         |             | SPECIAL       |         |   |
| ACQUISITION       | temp        | 25.0        |               |         |   |
| sw                | gain        | 4.6         |               |         |   |
| at                | spn         | not used    |               |         |   |
| np                | hst         | 0.008       |               |         |   |
| fb                | pw90        | 8.700       |               |         |   |
| bs                | atfa        | 10.000      |               |         |   |
| d1                | 1.000       |             | FLAGS         |         |   |
| nt                | 8           |             | i1            | n       |   |
| ct                | 8           |             | in            | n       |   |
| TRANSMITTER       | HI          | hs          | dp            | y       |   |
| tn                | 399.771     | fn          | not used      | nn      |   |
| sfreq             | 399.8       | fn          | not used      |         |   |
| tof               | 62          | DISPLAY     |               |         |   |
| tpwr              | 4.350       | SP          | -806.1        |         |   |
| PW                | DECOUPLER   | C13         | WP            | 6409.9  |   |
| dn                | 0           | rfl         | 806.5         |         |   |
| dof               | 0           | rfl         | 0             |         |   |
| dm                | hnn         | lp          | -170.6        |         |   |
| decwave           | M40_AutoX_~ |             |               |         |   |
| DB_PFG_MR0902W042 | 39          | WC          | 250           |         |   |
| dpmr              | 29412       | SC          | 0             |         |   |
| dmf               |             | th          | 136           |         |   |
|                   |             | ai          | cdc           | ph      | 7 |

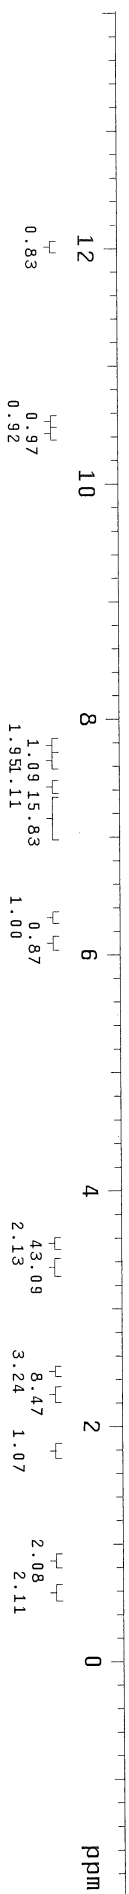



peng-103 stability time 0

expl s2pu1

```
SAMPLE      PRESSATURATION
date May 20 2015 satmode n
solvent Cdc13 wet n
file /home/liu/vnm~ SPECIAL
rsys/data/peng/5-1~ temp 25.0
71-28.fid gain 30
ACQUISITION spin not used
SW 32051.3 hst 0.008
at 0.100 pw90 11.900
np 6410 atfa 10.000
fb 17000
bs 4 11 n
d1 0.100 in n
nt 4000 dp y
ct 372 hs nn
TRANSMITTER B11 1b 15.00
stfq 160.382 fn not used
tof 4817.4 DISPLAY
tpwr 55 sp -16071.3
pw 11.750 wp 32043.5
DECOUPLER H1 rfi 16079.1
dn H1 rfp 0
dof 0 rfp -266.9
dm nny 1p 0
decwave w PLOT 250
dpwr 40 wc 0
dmf 12361 vs 417150
ai cdc ph 34
```

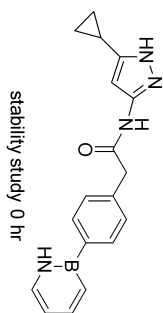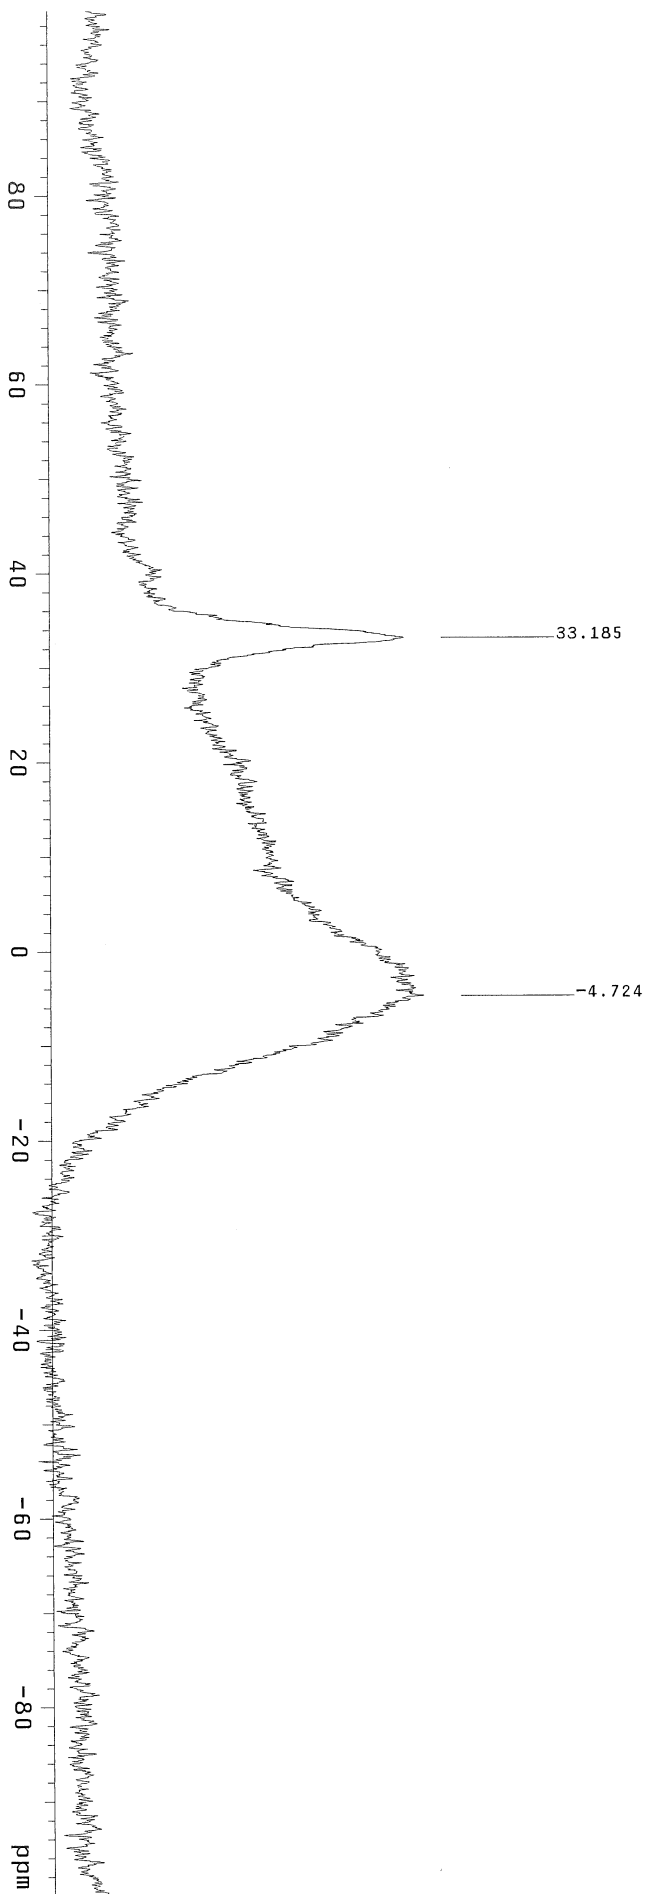

peng-103 stability time 24hr  
 exp2 PROTON

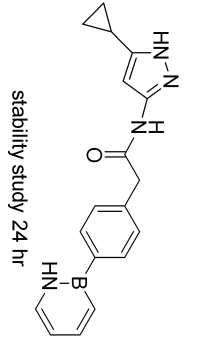

SAMPLE PRESATURATION  
 date May 21 2015 satmode n  
 solvent dms0 wet n  
 ffile SPECIAL  
 ACQUISITION temp 25.0  
 sw 6410.3 gain 46  
 at 2.556 spin not used  
 np 32768 hst 0.008  
 fb 4000 pw90 8.700  
 bs 32 a1fa 10.000  
 DI 1.000 FLAGS  
 DI i1 n  
 nt in n  
 ct 8 dp y  
 TRANSMITTER hs nn  
 tn H1  
 sfreq 399.771 fn not used  
 tof 399.8  
 tpwr 62  
 pw 4.350 SP DISPLAY  
 DECOUPLER C13 WP -806.1  
 dn 0 rff1 6409.9  
 dof 0 rfp 806.5  
 dm nn rp 0  
 decouple V40 AutoX ~ -170.9  
 DB\_PFG\_MR0502W042 PLOT  
 dpwr 39 WC 250  
 dmf 29412 VS 0  
 th 181  
 ai cdc ph 7

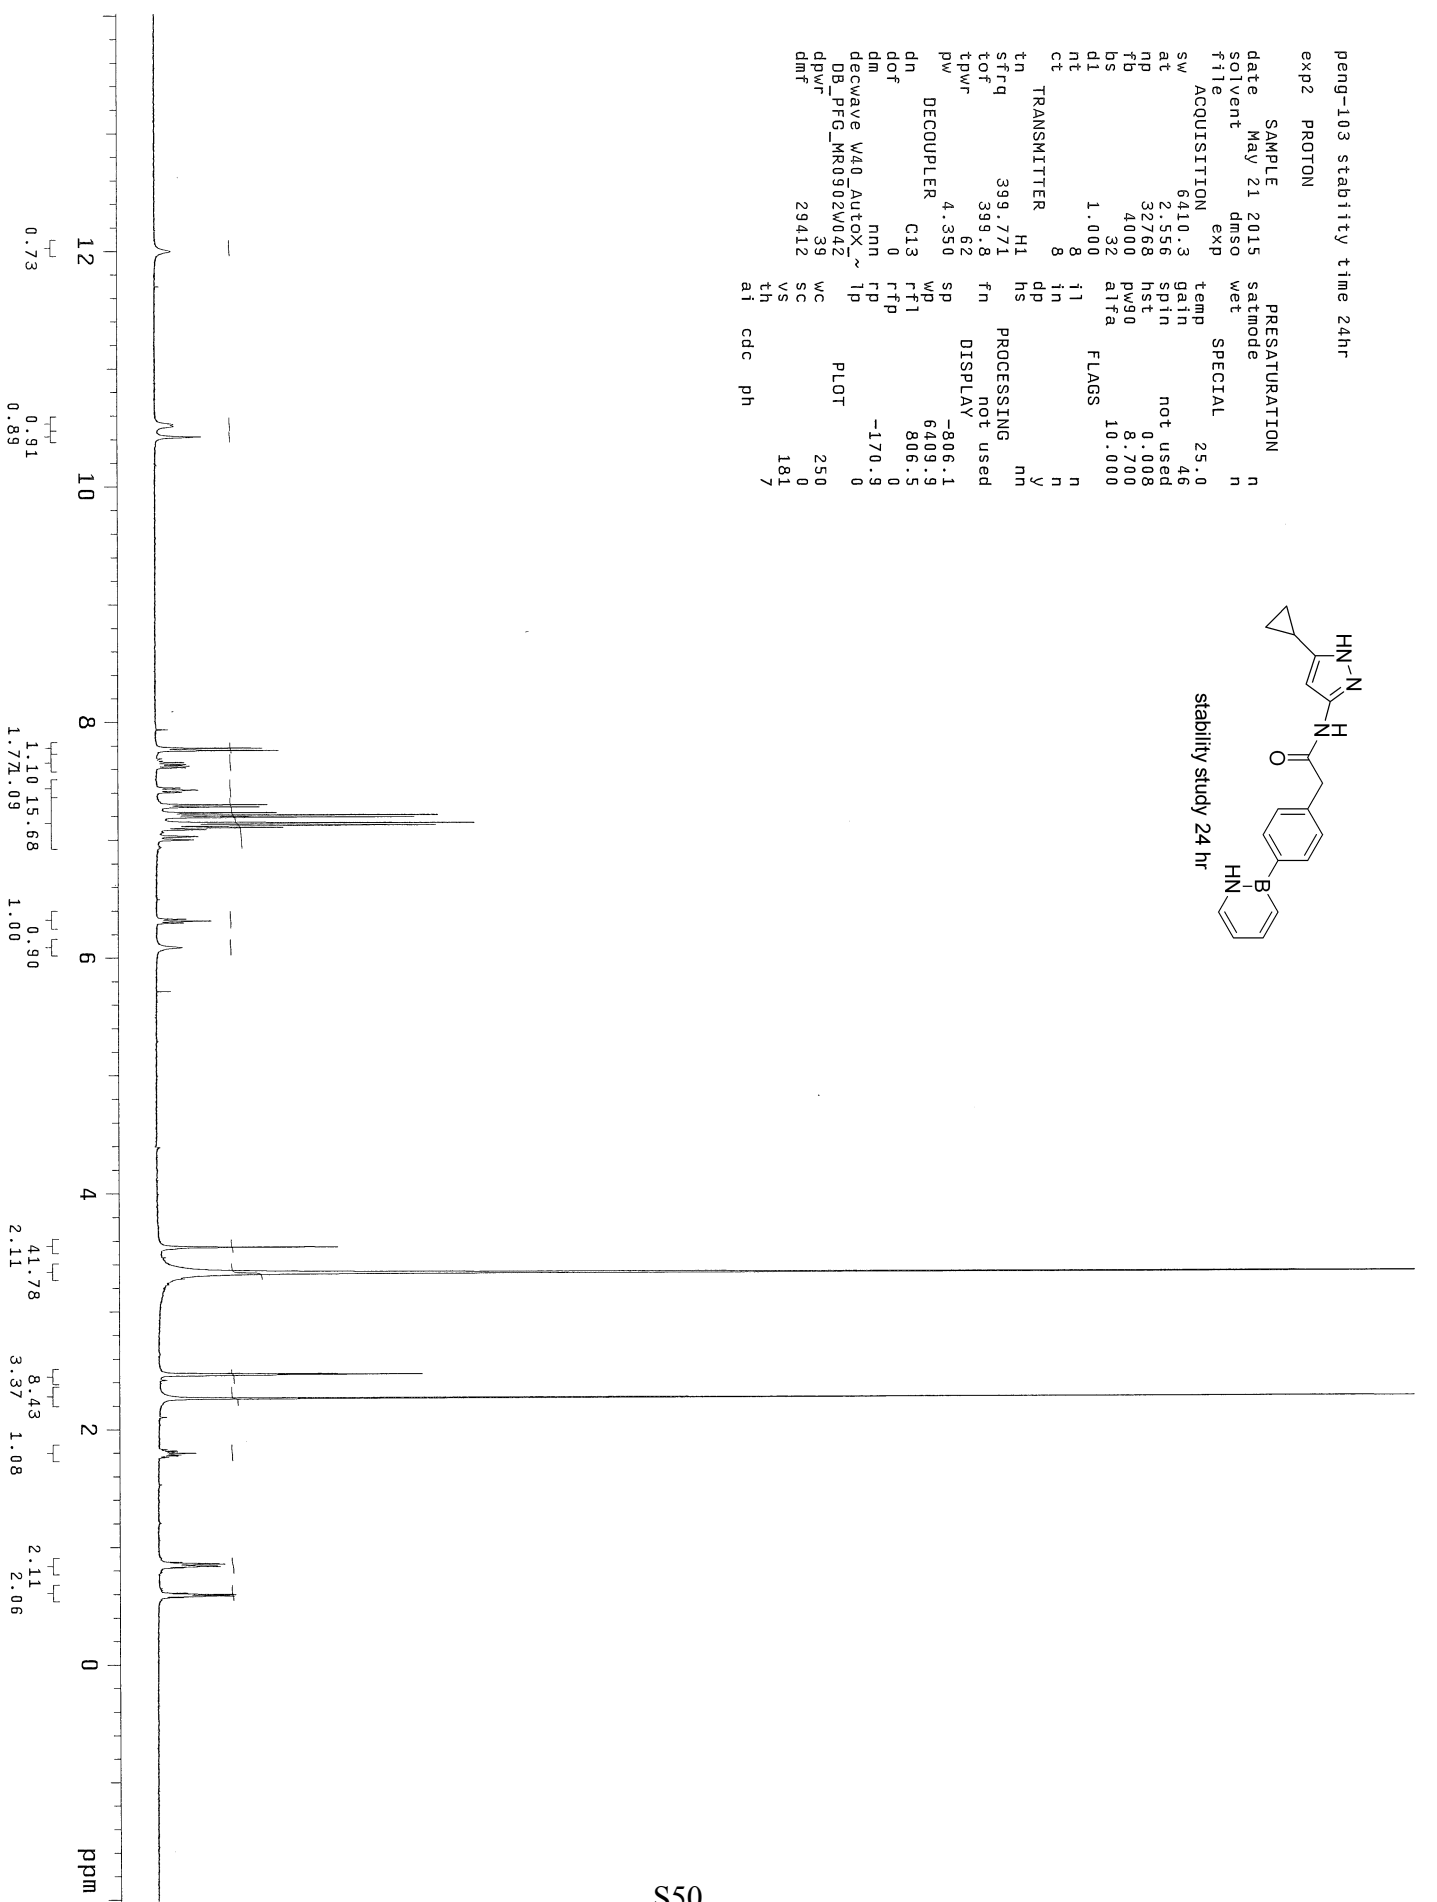

peng-103 stability time 24hr

exp2 szpu1

```
SAMPLE      PRESATURATION
date   May 21 2015  satmode  n
solvent  dmsd      wet      n
file     exp      SPECIAL  25.0
ACQUISITION  temp      30
sw       32051.3  gain      3.0
at       0.100   spin      not used
np       6410    hst       0.008
fb       17000  pw90     11.900
bs       4      atfa     10.000
dl       0.100  FLAGS
nt       4000   i1       n
ct       196    in       n
          TRANSMITTER  hs       y
          tn          dp       nn
          sfreq      160.382  fd       n
          tof       4817.4  fn       not used
          tpwr      11.750  DISPLAY
          pw       11.750  -15615.5
          DECOUPLER  H1      WP       32043.5
          dn       0      ffl      15623.3
          dof      0      rfp      0
          dm       nny    fp       -128.5
          decwave  v      lp       0
          dpwr     40     PLOT
          dmf      12361  wc       250
          vs       0      sc       0
          th       149540  th       0
          at       22     cdc      22
          ph
```

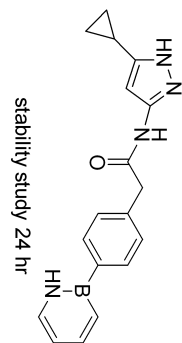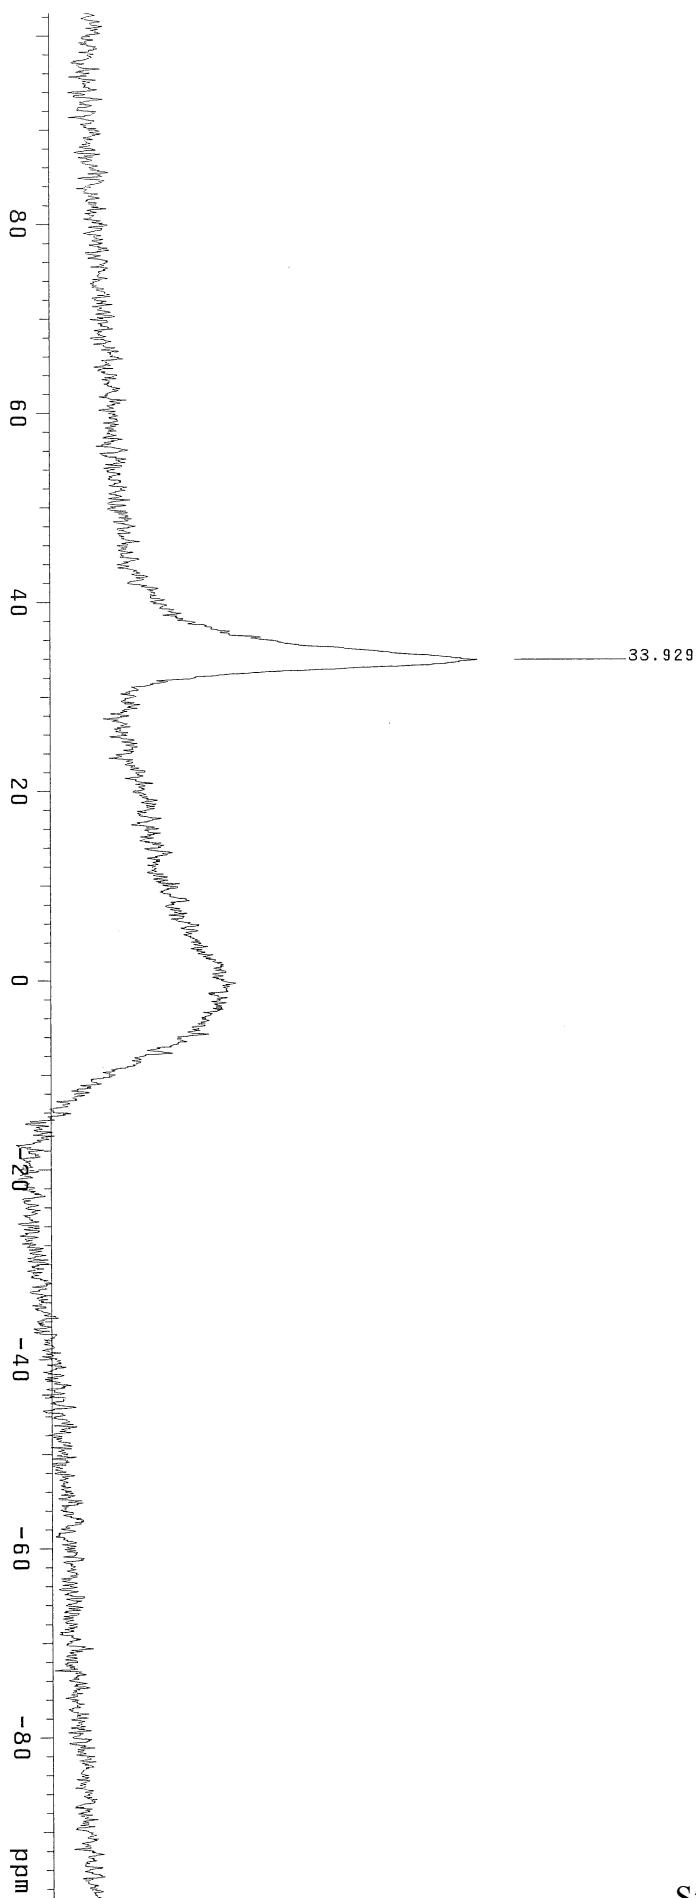

Supplement: NIHMS889376-supplement-Supporting_Information.pdf [file NIHMS889376-supplement-Supporting_Information.pdf]
